# Supplementary material for: Transversely isotropic lower crust of Variscan central Europe imaged by ambient noise tomography of the Bohemian Massif
Source: Copernicus journal article supplement (doi:10.5194/se-12-1051-2021), 2021-05-11
Supplement: Supplementary file 12 [file se-12-1051-2021-supplement.zip]

Archive with 29 entries (29 files):
- Supplement_20.pdf
- Supplement_22.pdf
- Supplement_19.pdf
- Supplement_12.pdf
- Captions_for_Supplementary_Figures.pdf
- se-12-1051-2021-supplement-title-page.pdf
- Supplement_16.pdf
- Supplement_26.pdf
- Supplement_15.pdf
- Supplement_11.pdf
- Supplement_24.pdf
- Supplement_05_upd1.pdf
- Supplement_17.pdf
- Supplement_02_upd1.pdf
- Supplement_23.pdf
- Supplement_01_upd1.pdf
- Supplement_21.pdf
- Supplement_25.pdf
- Supplement_13.pdf
- Supplement_14.pdf
- Supplement_06.pdf
- Supplement_10.pdf
- Supplement_18.pdf
- Captions_for_Supplementary_Figures.docx
- Supplement_07.pdf
- Supplement_09.pdf
- Supplement_08.pdf
- Supplement_04_upd1.pdf
- Supplement_03_upd1.pdf
