# Supplementary material for: Transversely isotropic lower crust of Variscan central Europe imaged by ambient noise tomography of the Bohemian Massif
Source: Copernicus journal article supplement (doi:10.5194/se-12-1051-2021), 2021-05-11
Supplement: Supplementary file 12 [file se-12-1051-2021-supplement.zip › se-12-1051-2021-supplement-title-page.pdf]

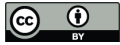

## *Supplement of*

# **Transversely isotropic lower crust of Variscan central Europe imaged by ambient noise tomography of the Bohemian Massif**

**Jiří Kvapil et al.**

*Correspondence to:* Jiří Kvapil ([j.kvapil@ig.cas.cz](mailto:j.kvapil@ig.cas.cz))

- [se-12-1051-2021-supplement-title-page.pdf](#)
- [Captions\\_for\\_Supplementary\\_Figures.docx](#)
- [Captions\\_for\\_Supplementary\\_Figures.pdf](#)
- [Supplement\\_01\\_upd1.pdf](#)
- [Supplement\\_02\\_upd1.pdf](#)
- [Supplement\\_03\\_upd1.pdf](#)
- [Supplement\\_04\\_upd1.pdf](#)
- [Supplement\\_05\\_upd1.pdf](#)
- [Supplement\\_06.pdf](#)
- [Supplement\\_07.pdf](#)
- [Supplement\\_08.pdf](#)
- [Supplement\\_09.pdf](#)
- [Supplement\\_10.pdf](#)
- [Supplement\\_11.pdf](#)
- [Supplement\\_12.pdf](#)
- [Supplement\\_13.pdf](#)
- [Supplement\\_14.pdf](#)
- [Supplement\\_15.pdf](#)
- [Supplement\\_16.pdf](#)
- [Supplement\\_17.pdf](#)

- [Supplement\\_18.pdf](#)
- [Supplement\\_19.pdf](#)
- [Supplement\\_20.pdf](#)
- [Supplement\\_21.pdf](#)
- [Supplement\\_22.pdf](#)
- [Supplement\\_23.pdf](#)
- [Supplement\\_24.pdf](#)
- [Supplement\\_25.pdf](#)
- [Supplement\\_26.pdf](#)

The copyright of individual parts of the supplement might differ from the article licence.
