# Supplementary figures and images for: Transversely isotropic lower crust of Variscan central Europe imaged by ambient noise tomography of the Bohemian Massif
Source: Copernicus journal article supplement (doi:10.5194/se-12-1051-2021), 2021-05-11

# Band-pass filter: 34-40 s

## Summer

## Winter

a)

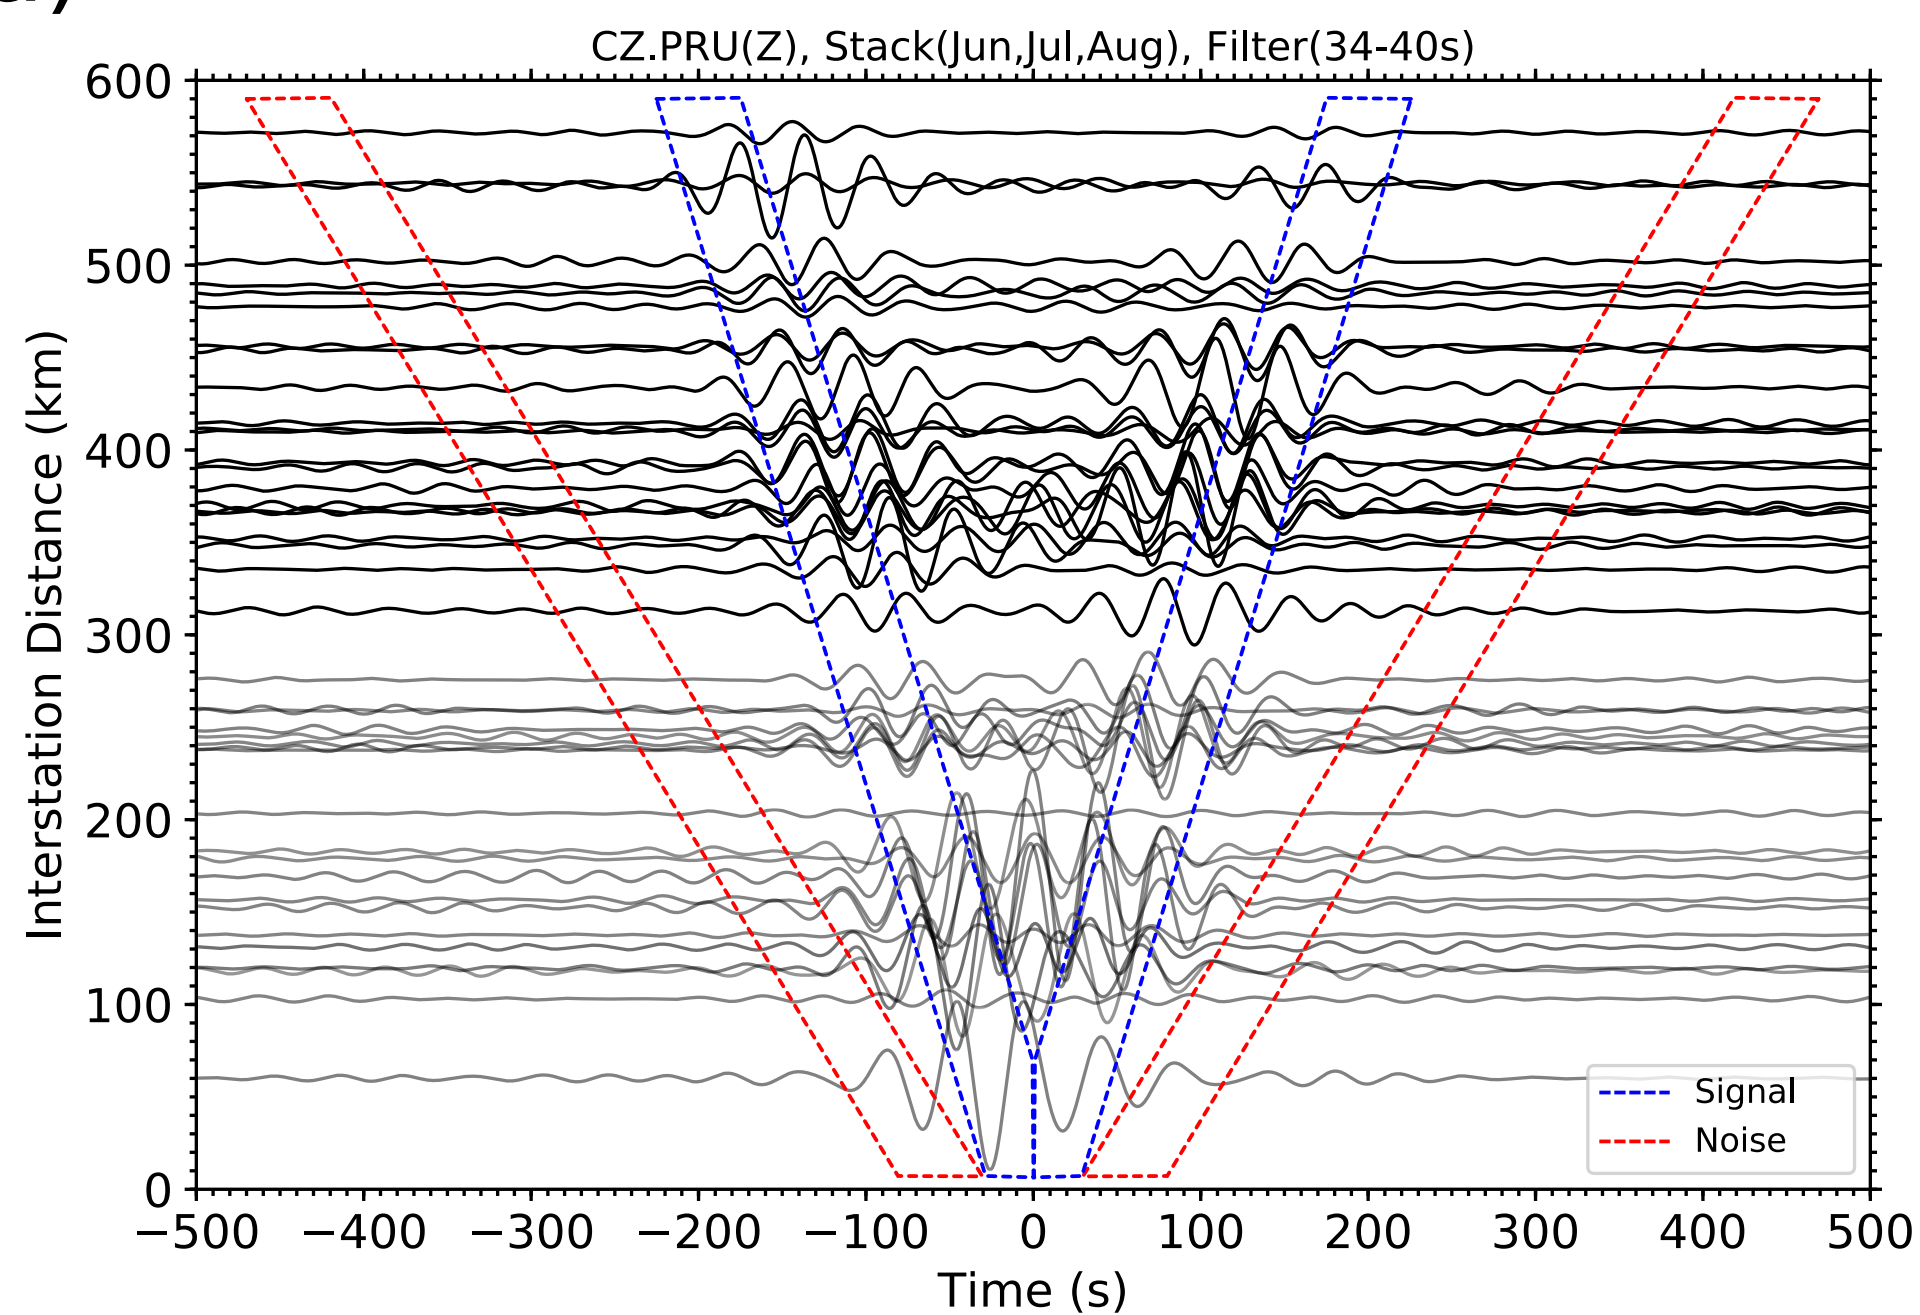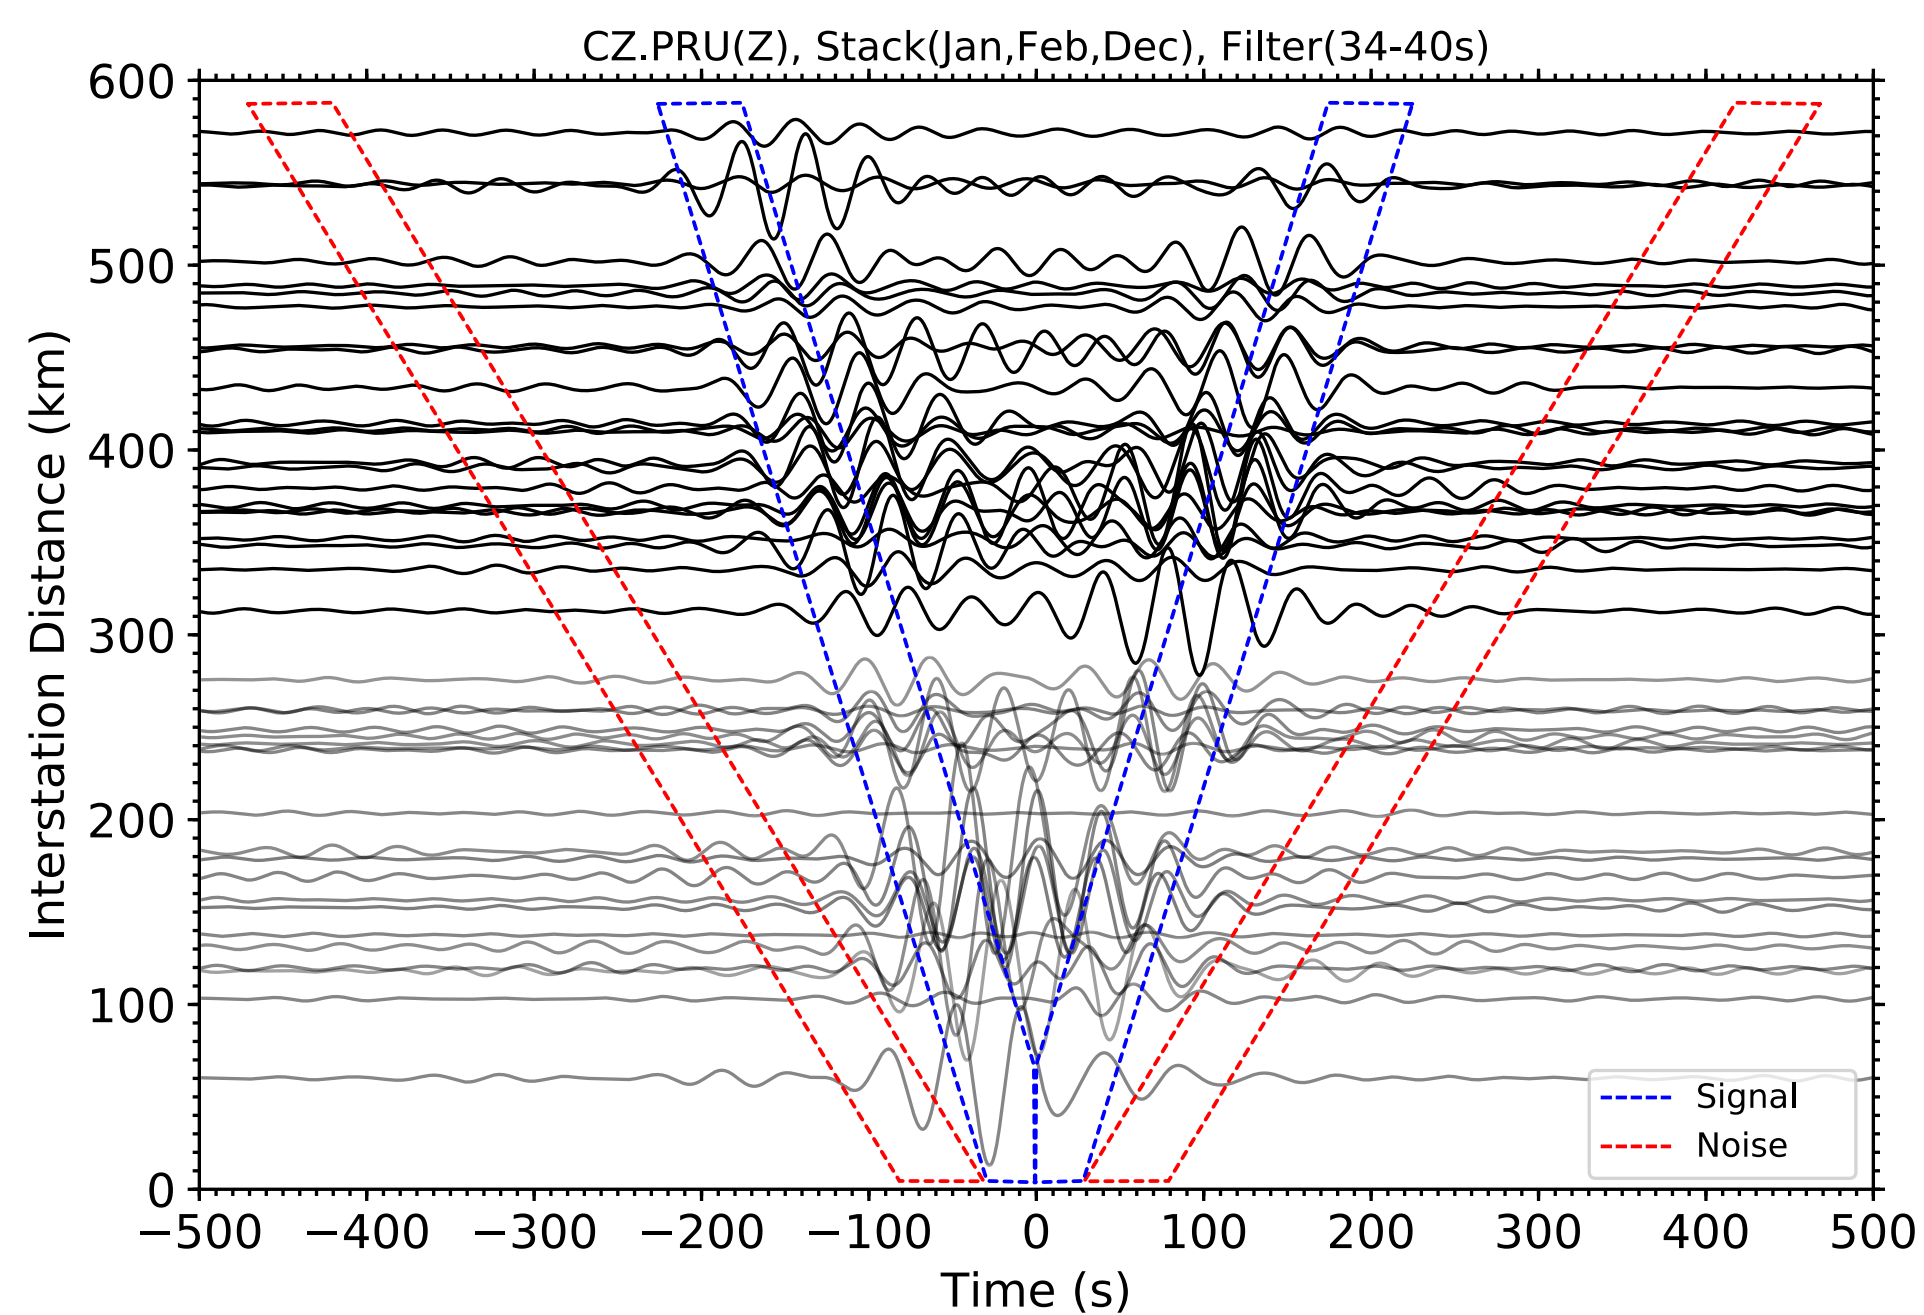

b)

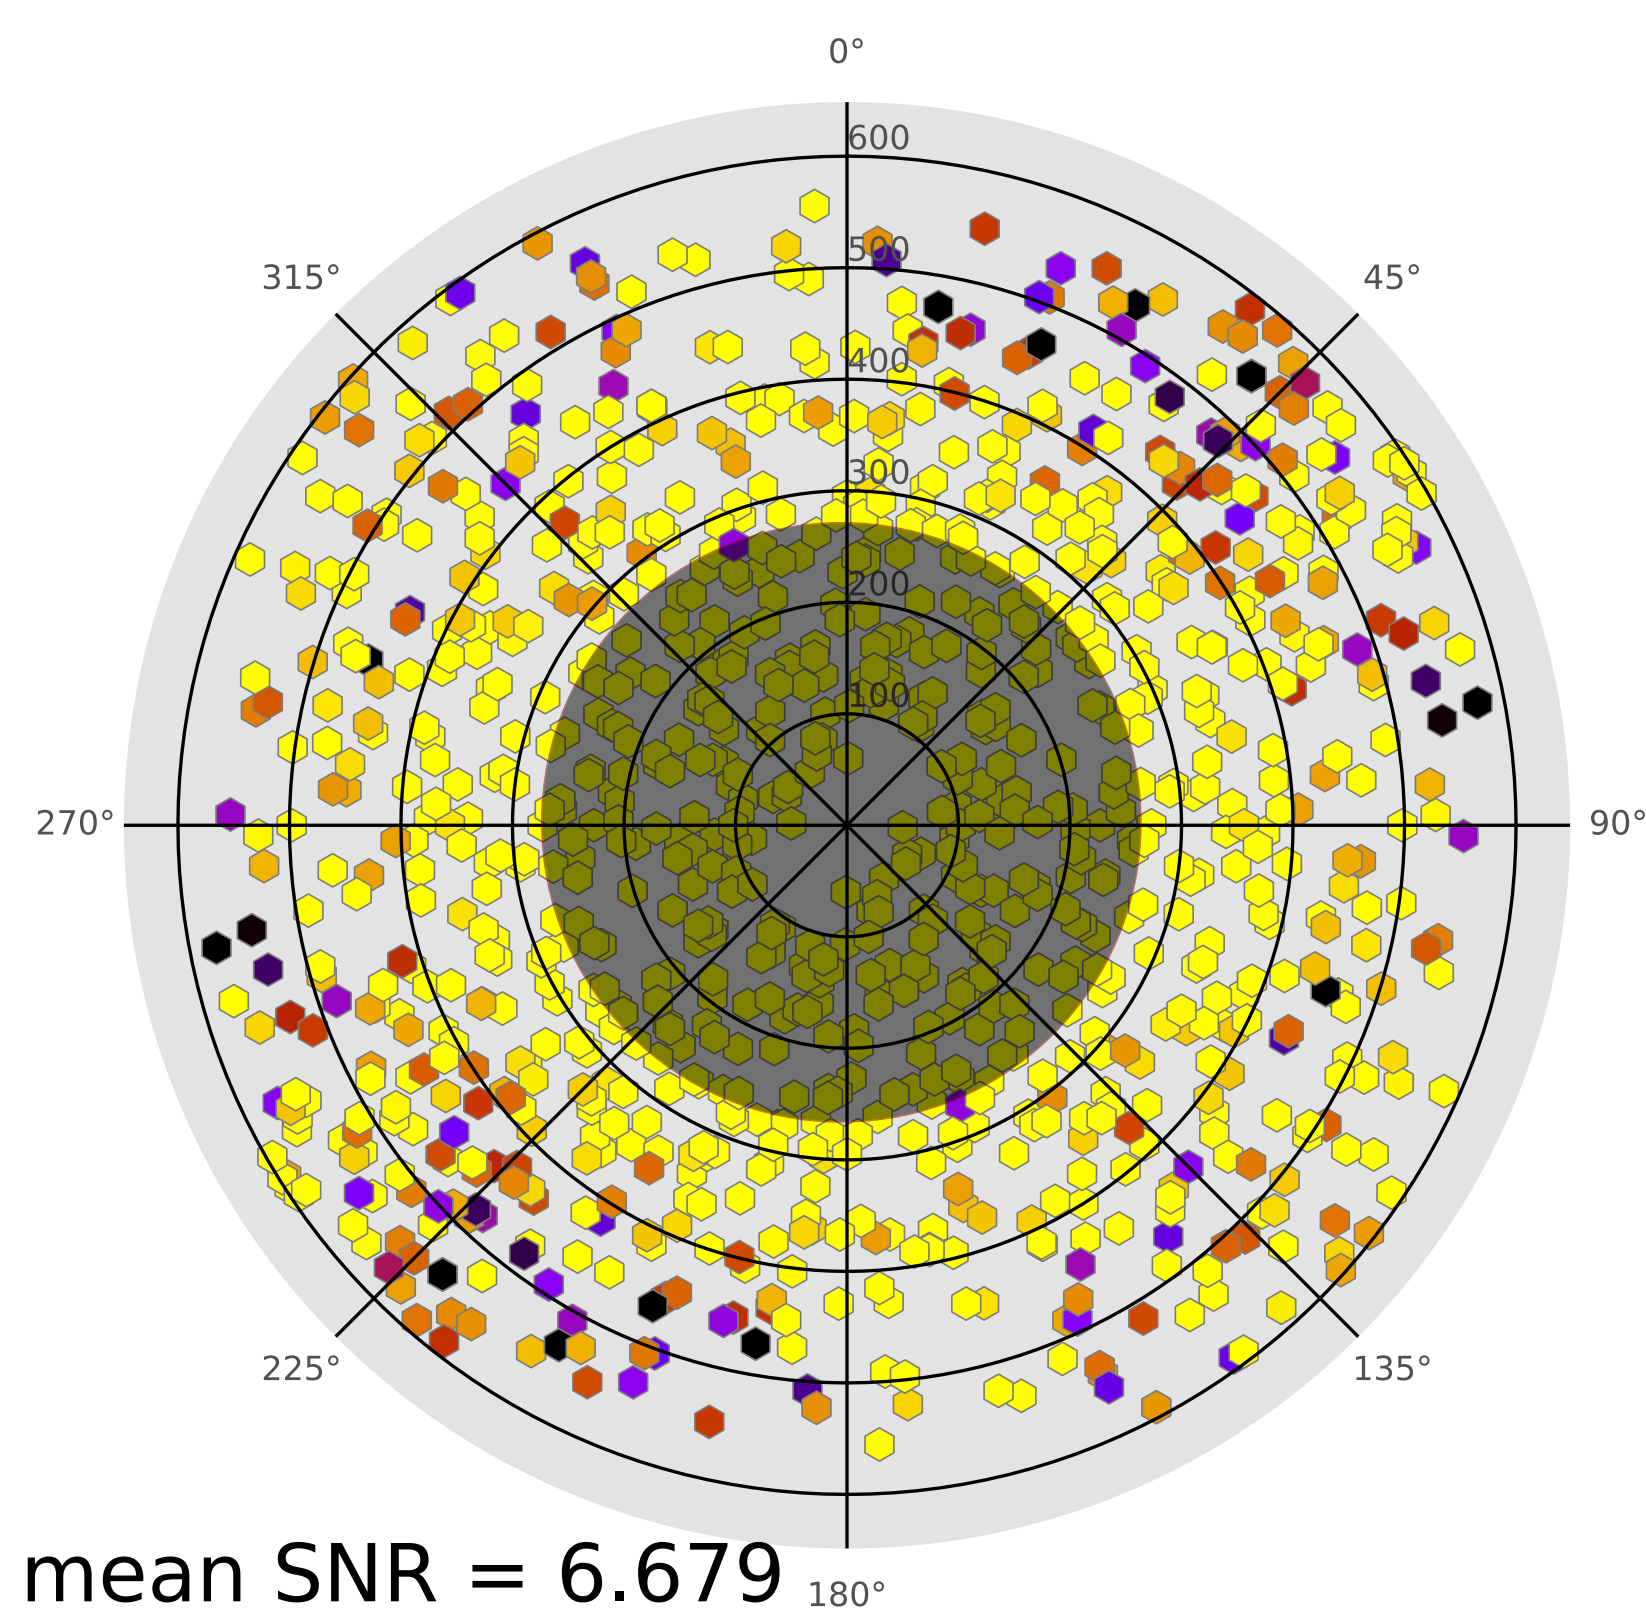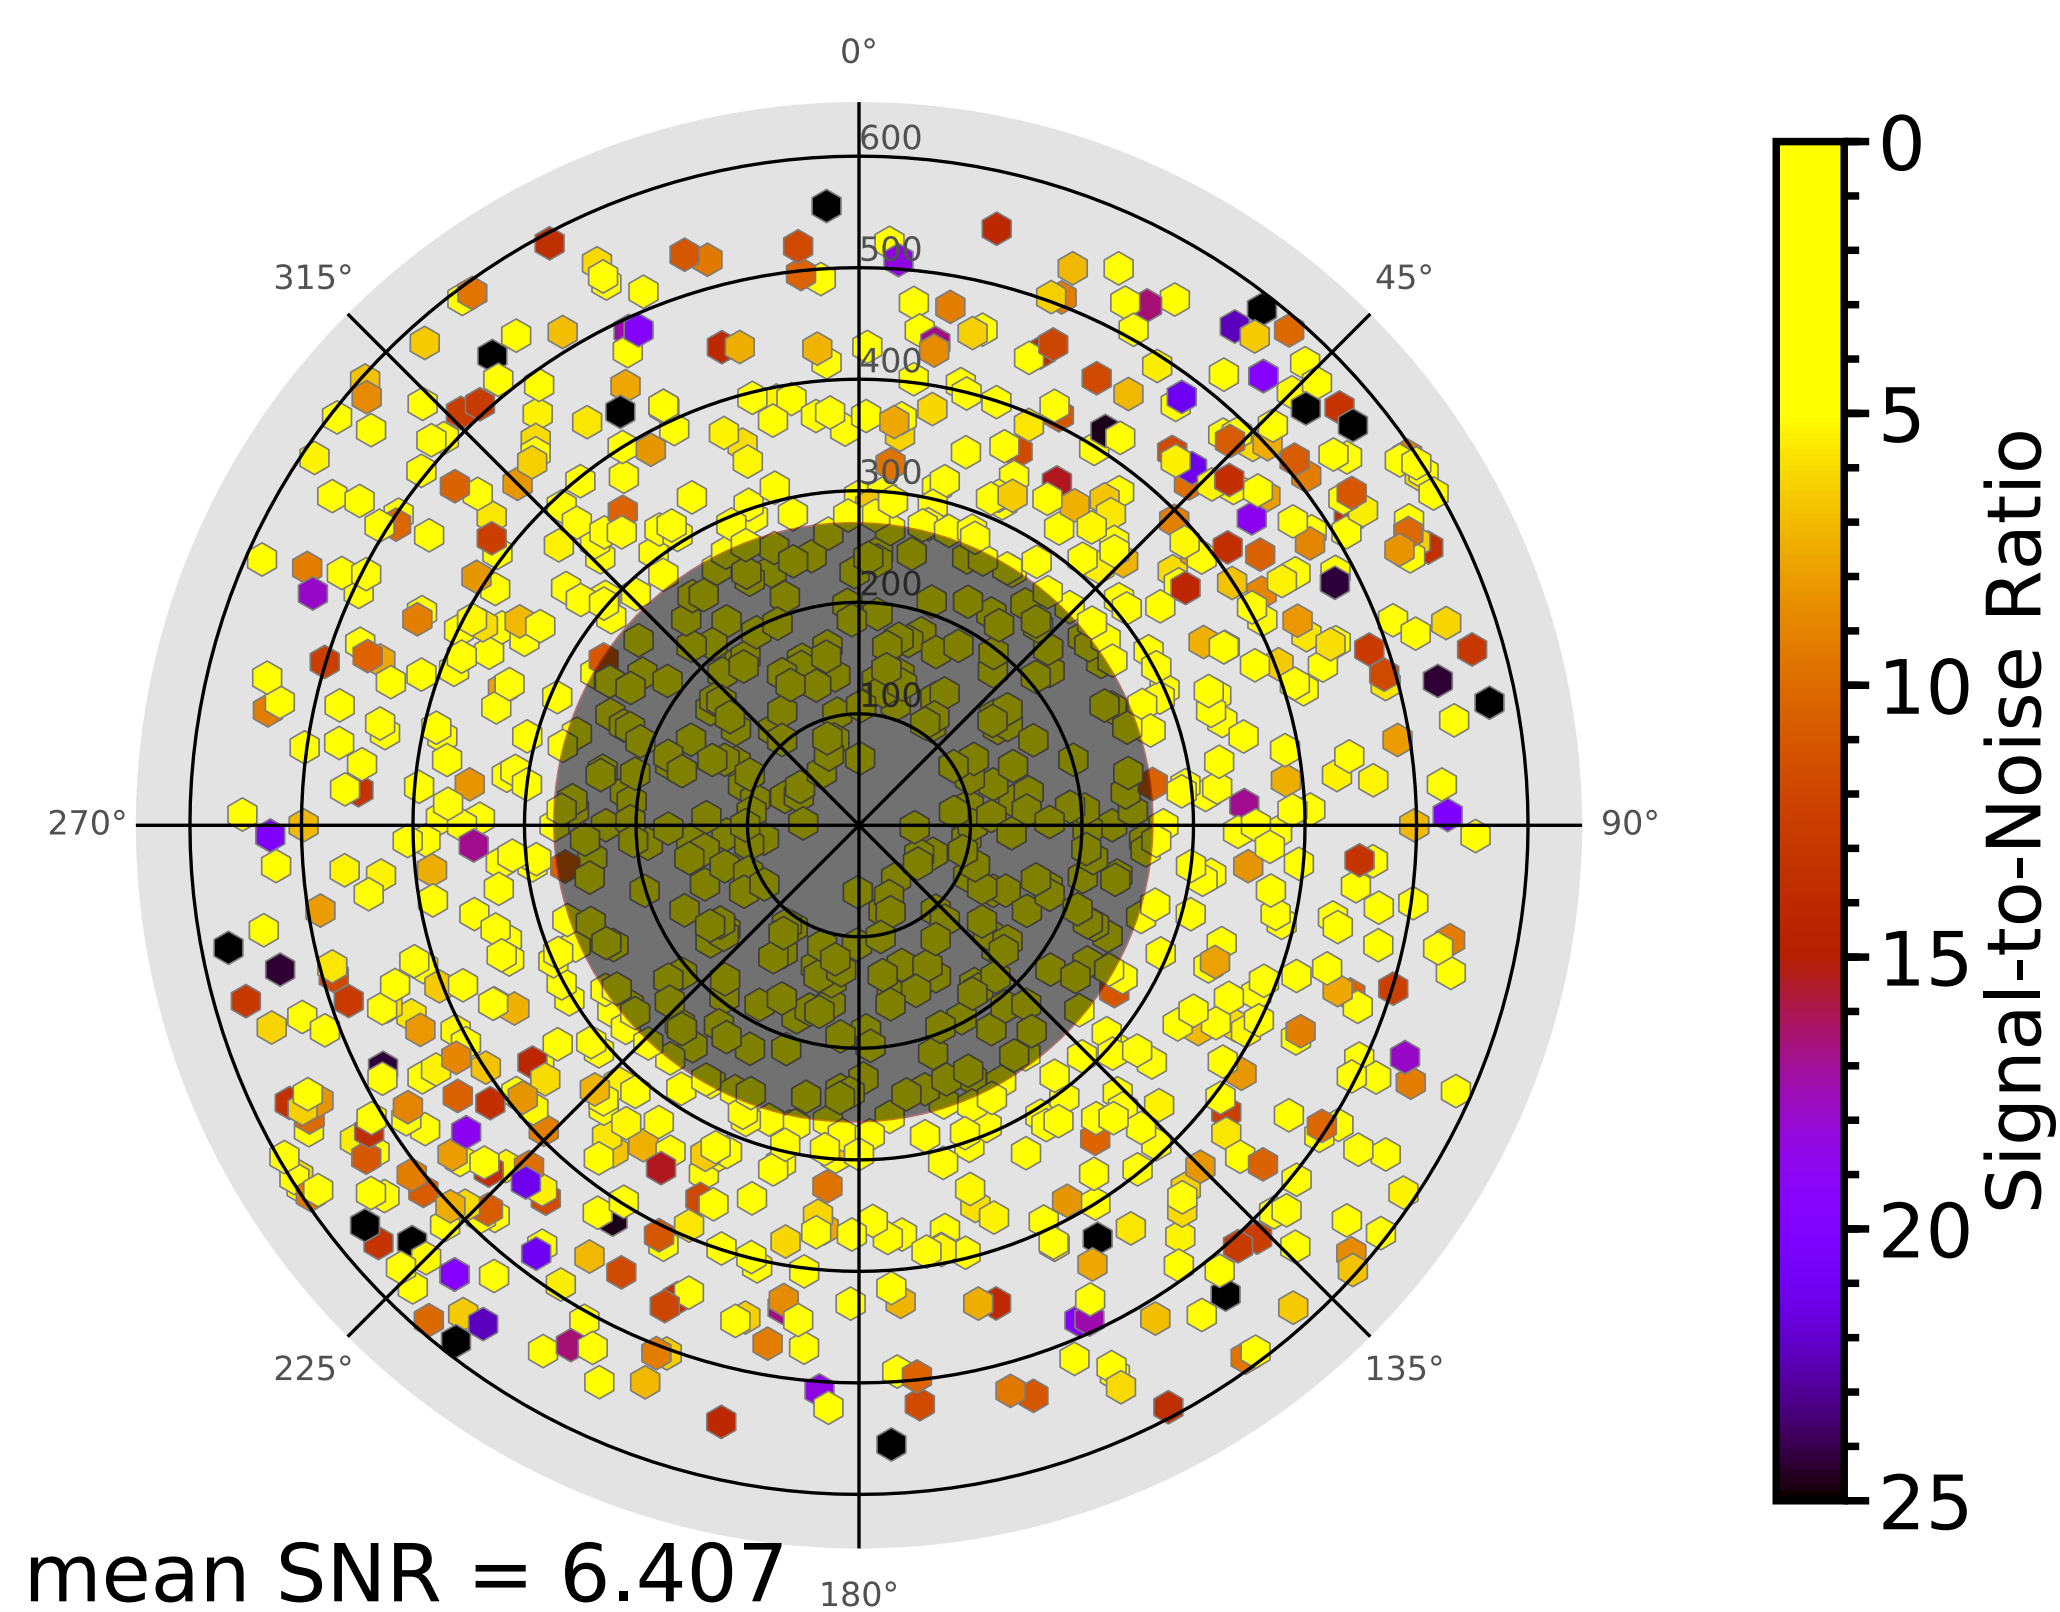

c)

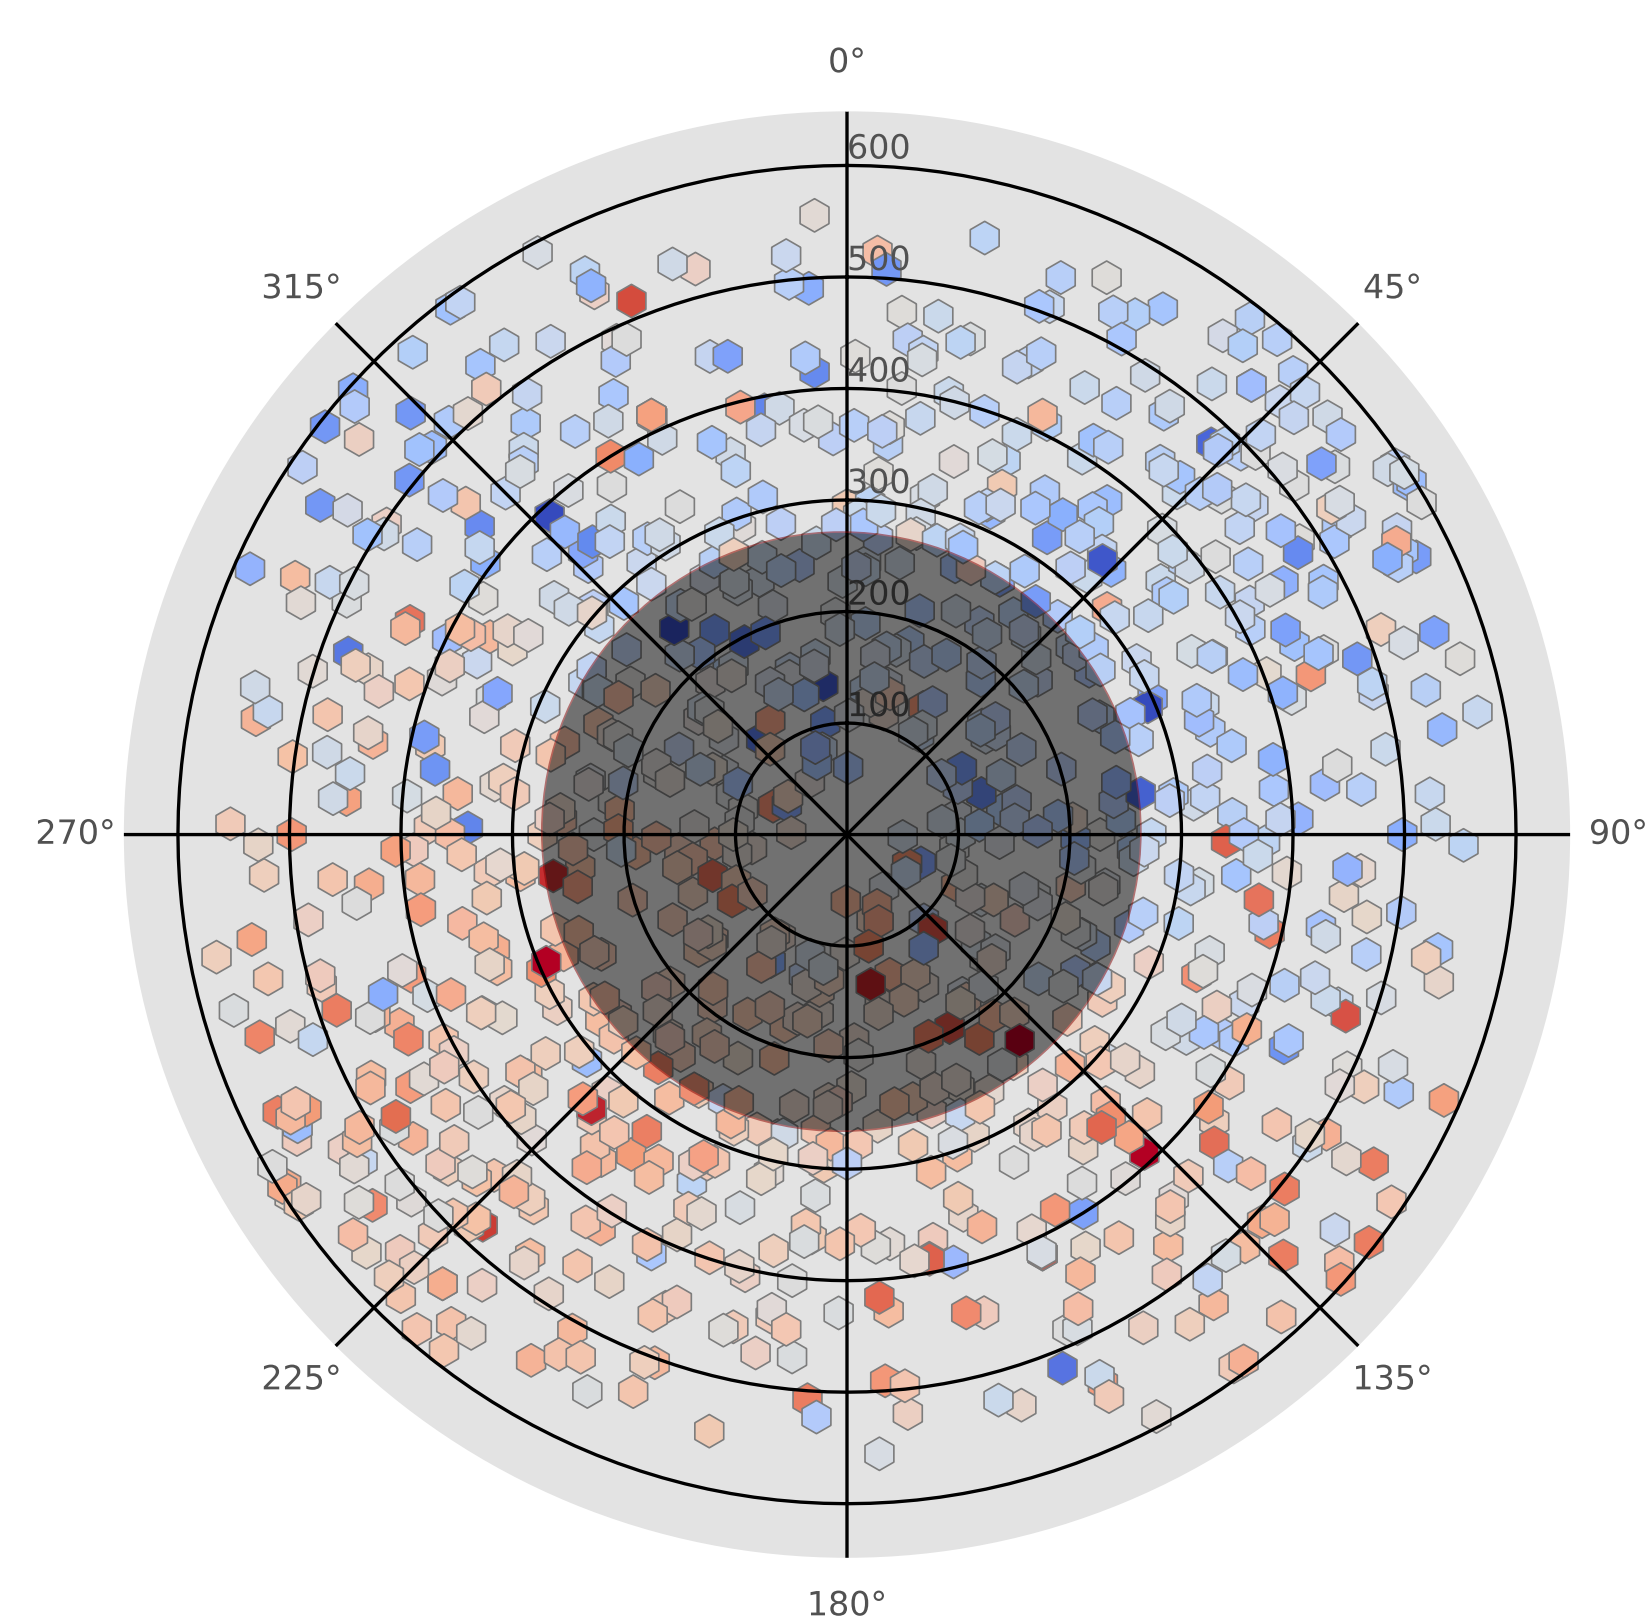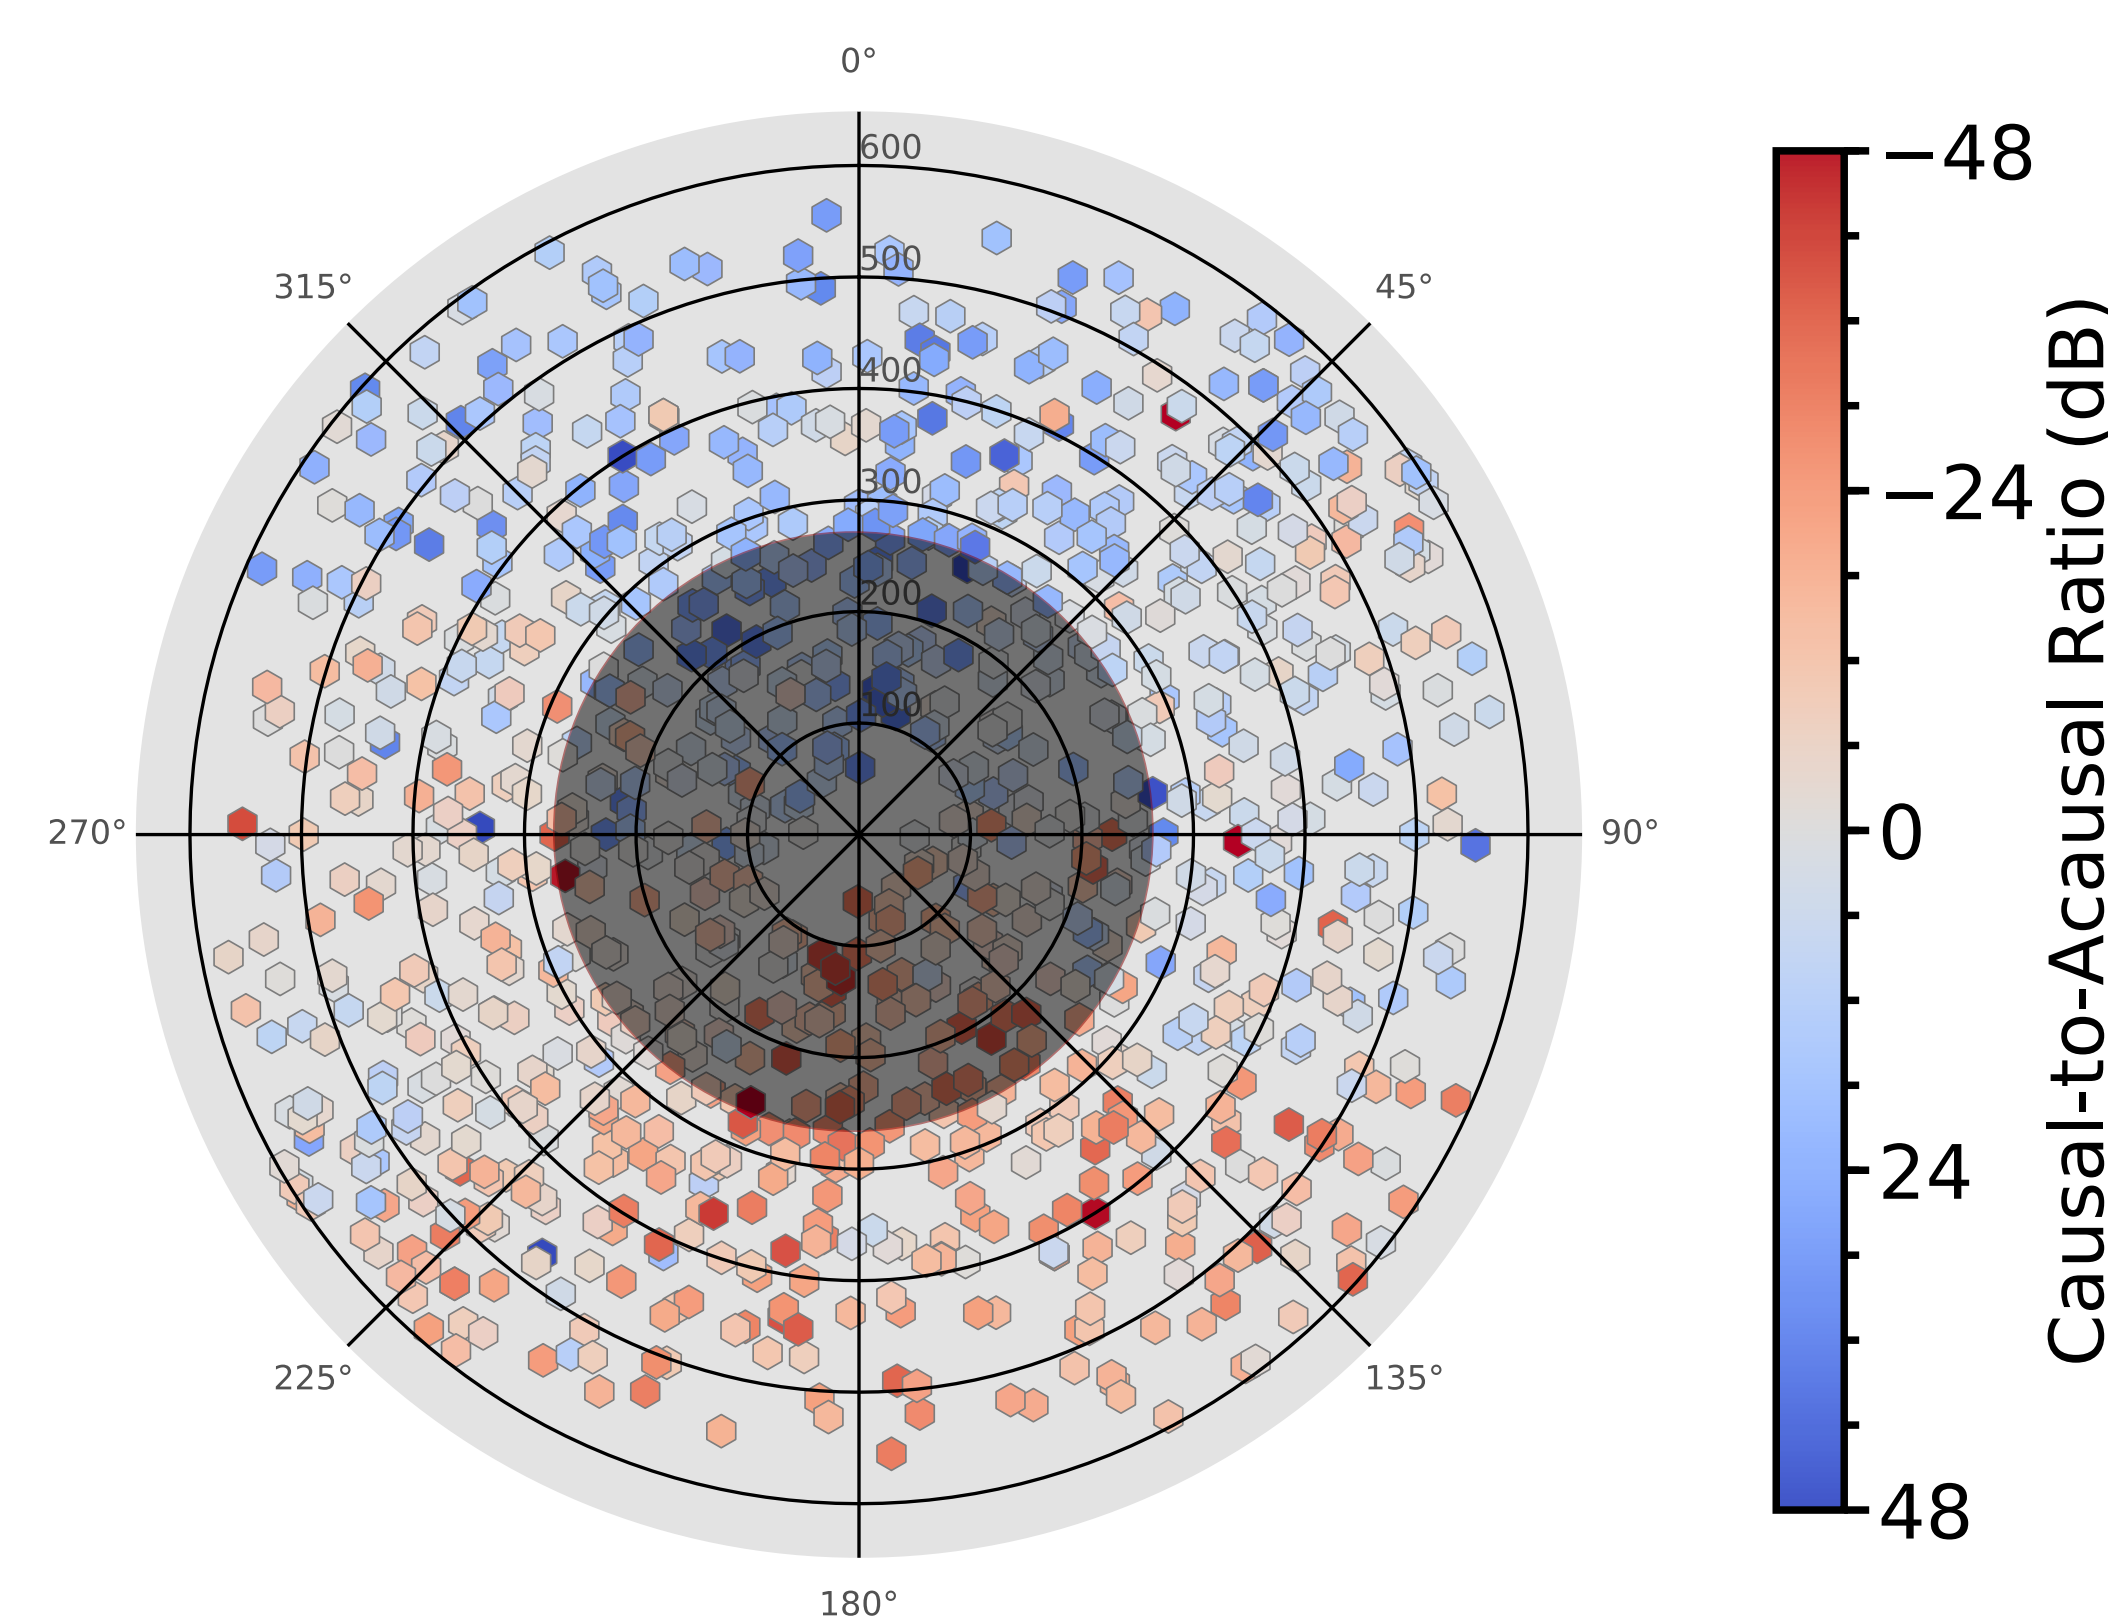

Supplement: Supplementary file 1 [file se-12-1051-2021-supplement.zip]

Band-pass filter: 5-7 s

Summer

Winter

a)

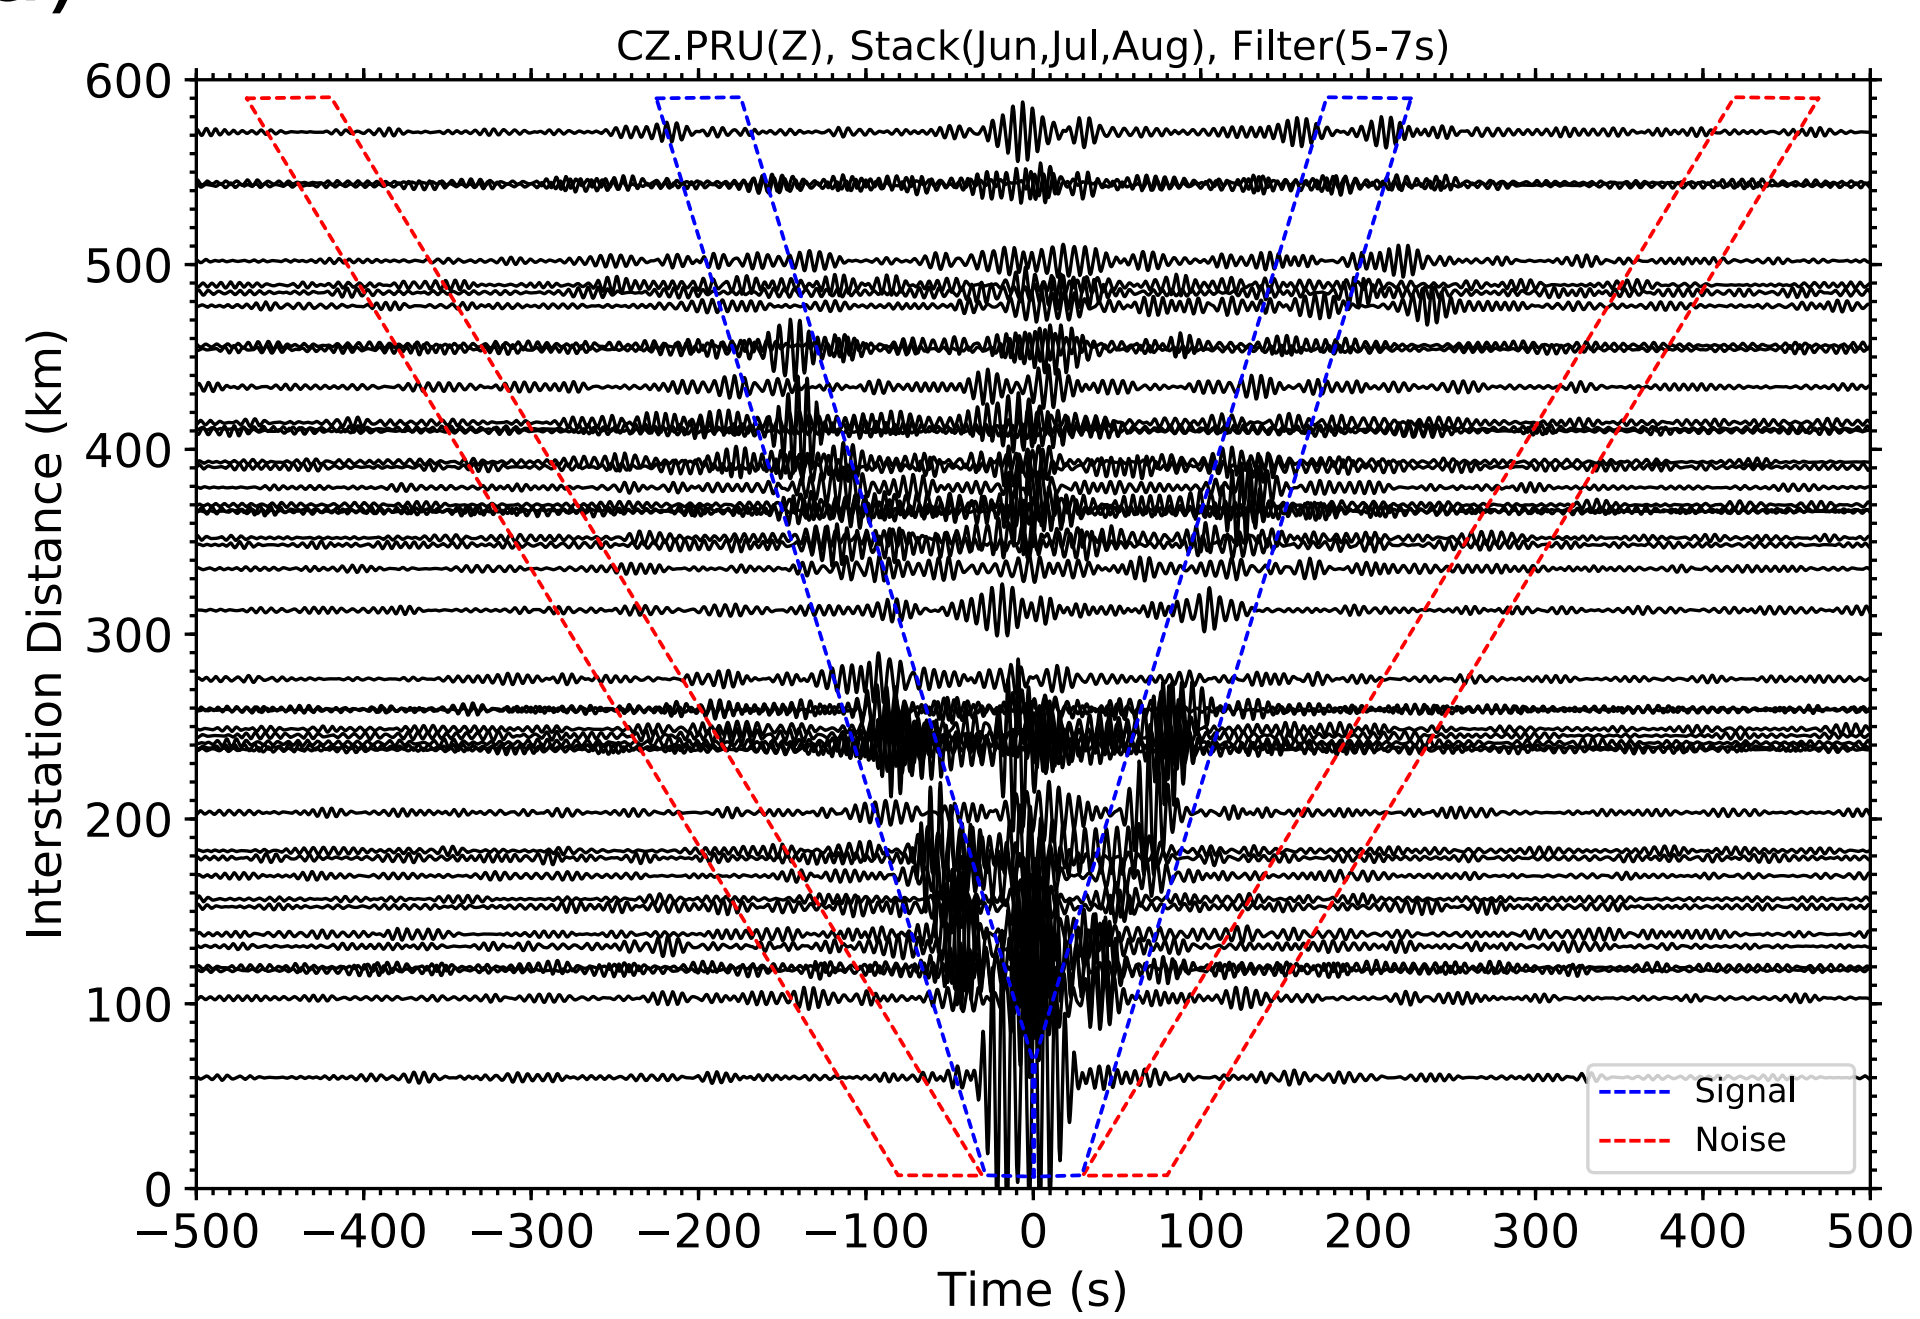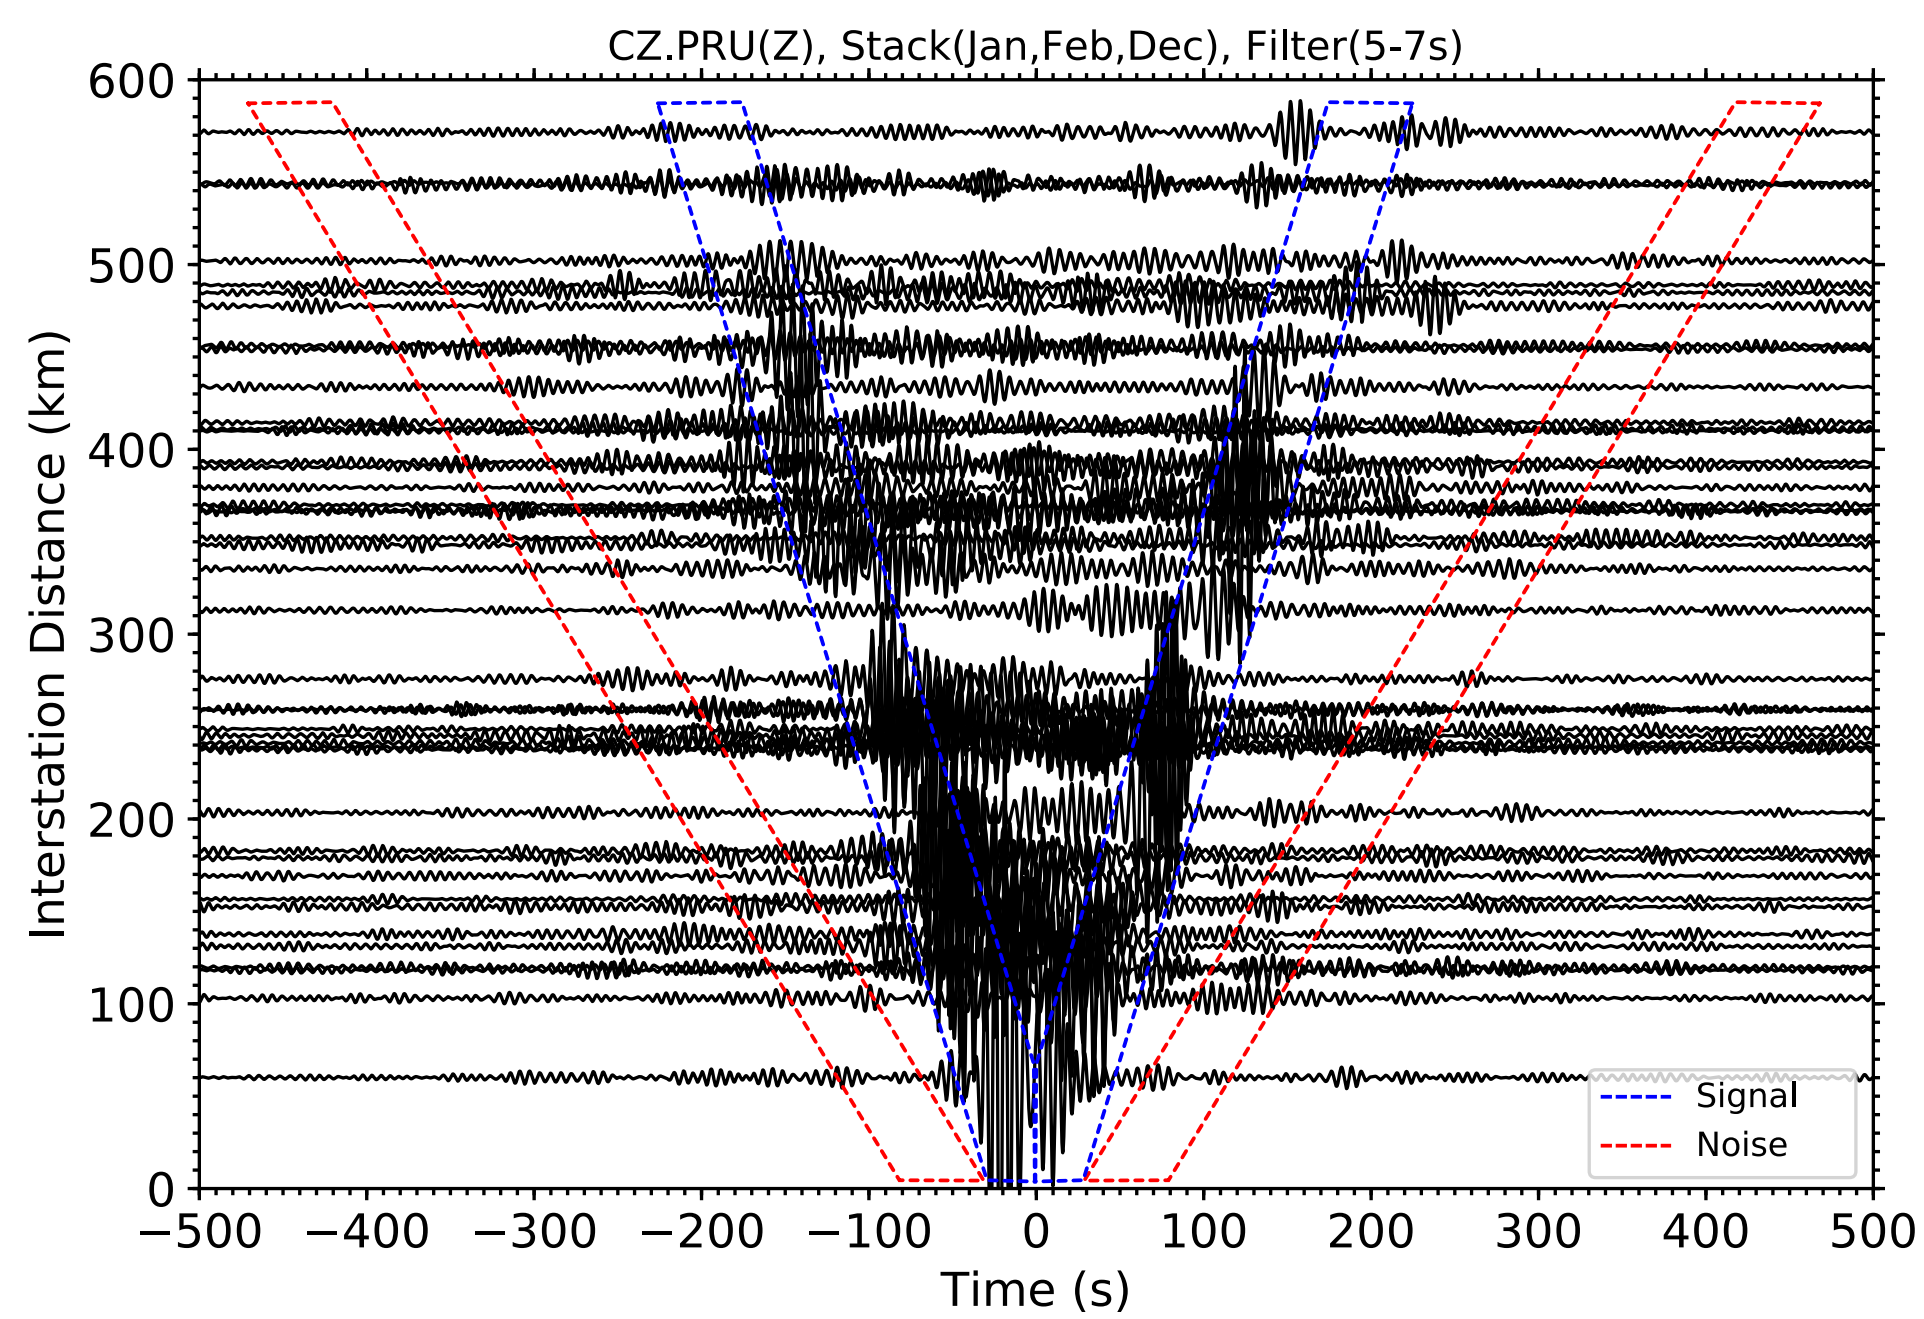

b)

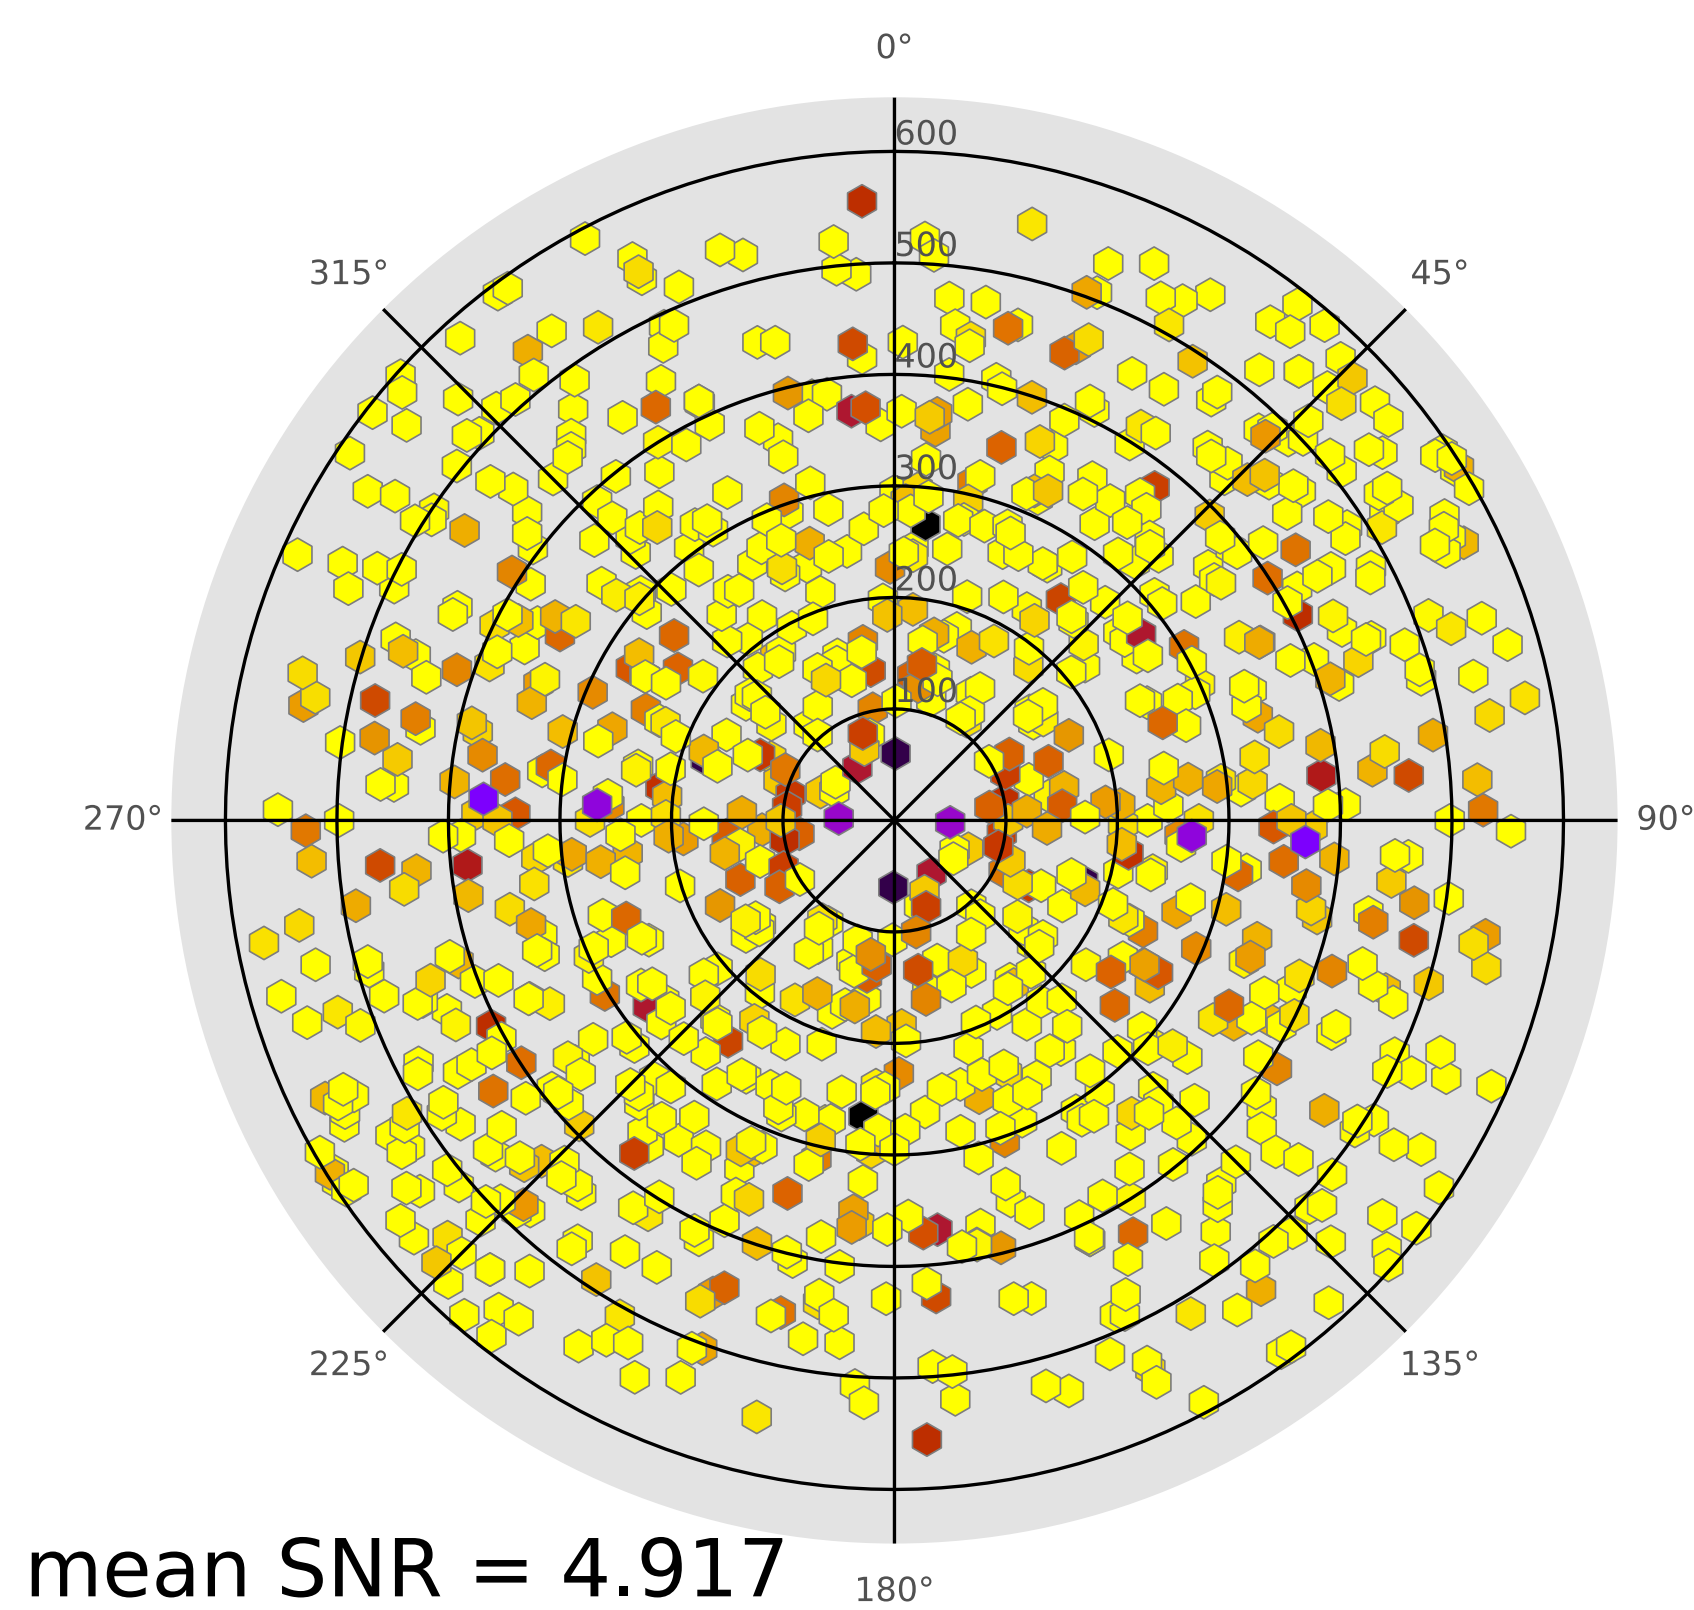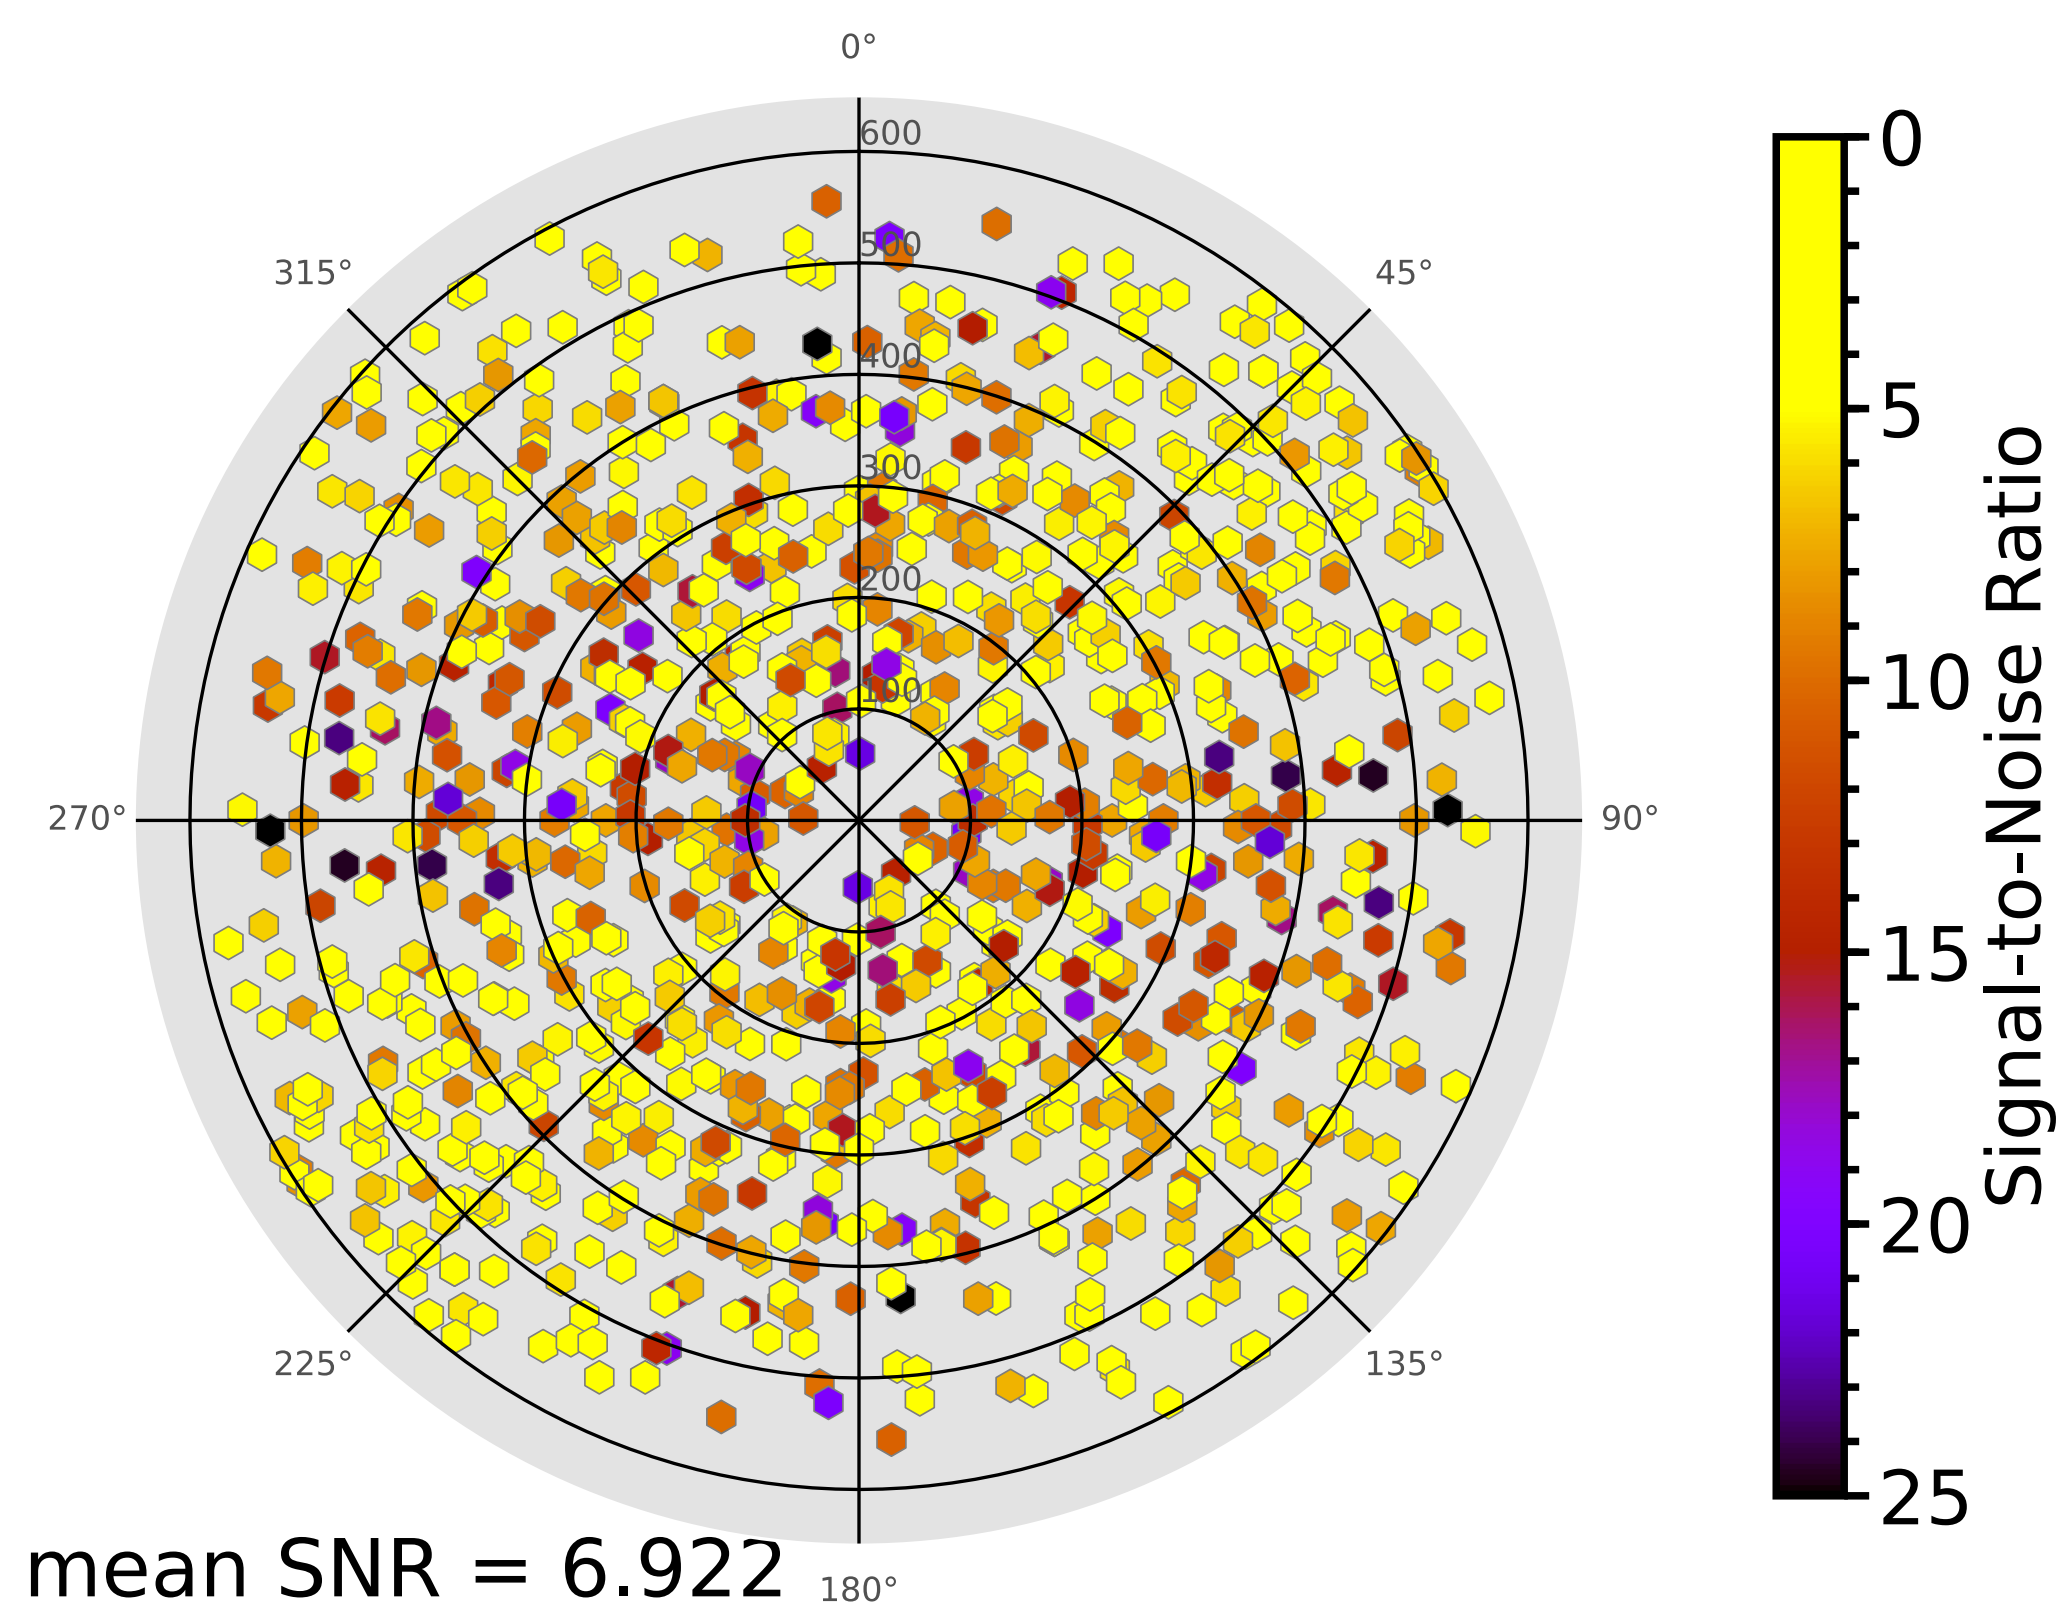

c)

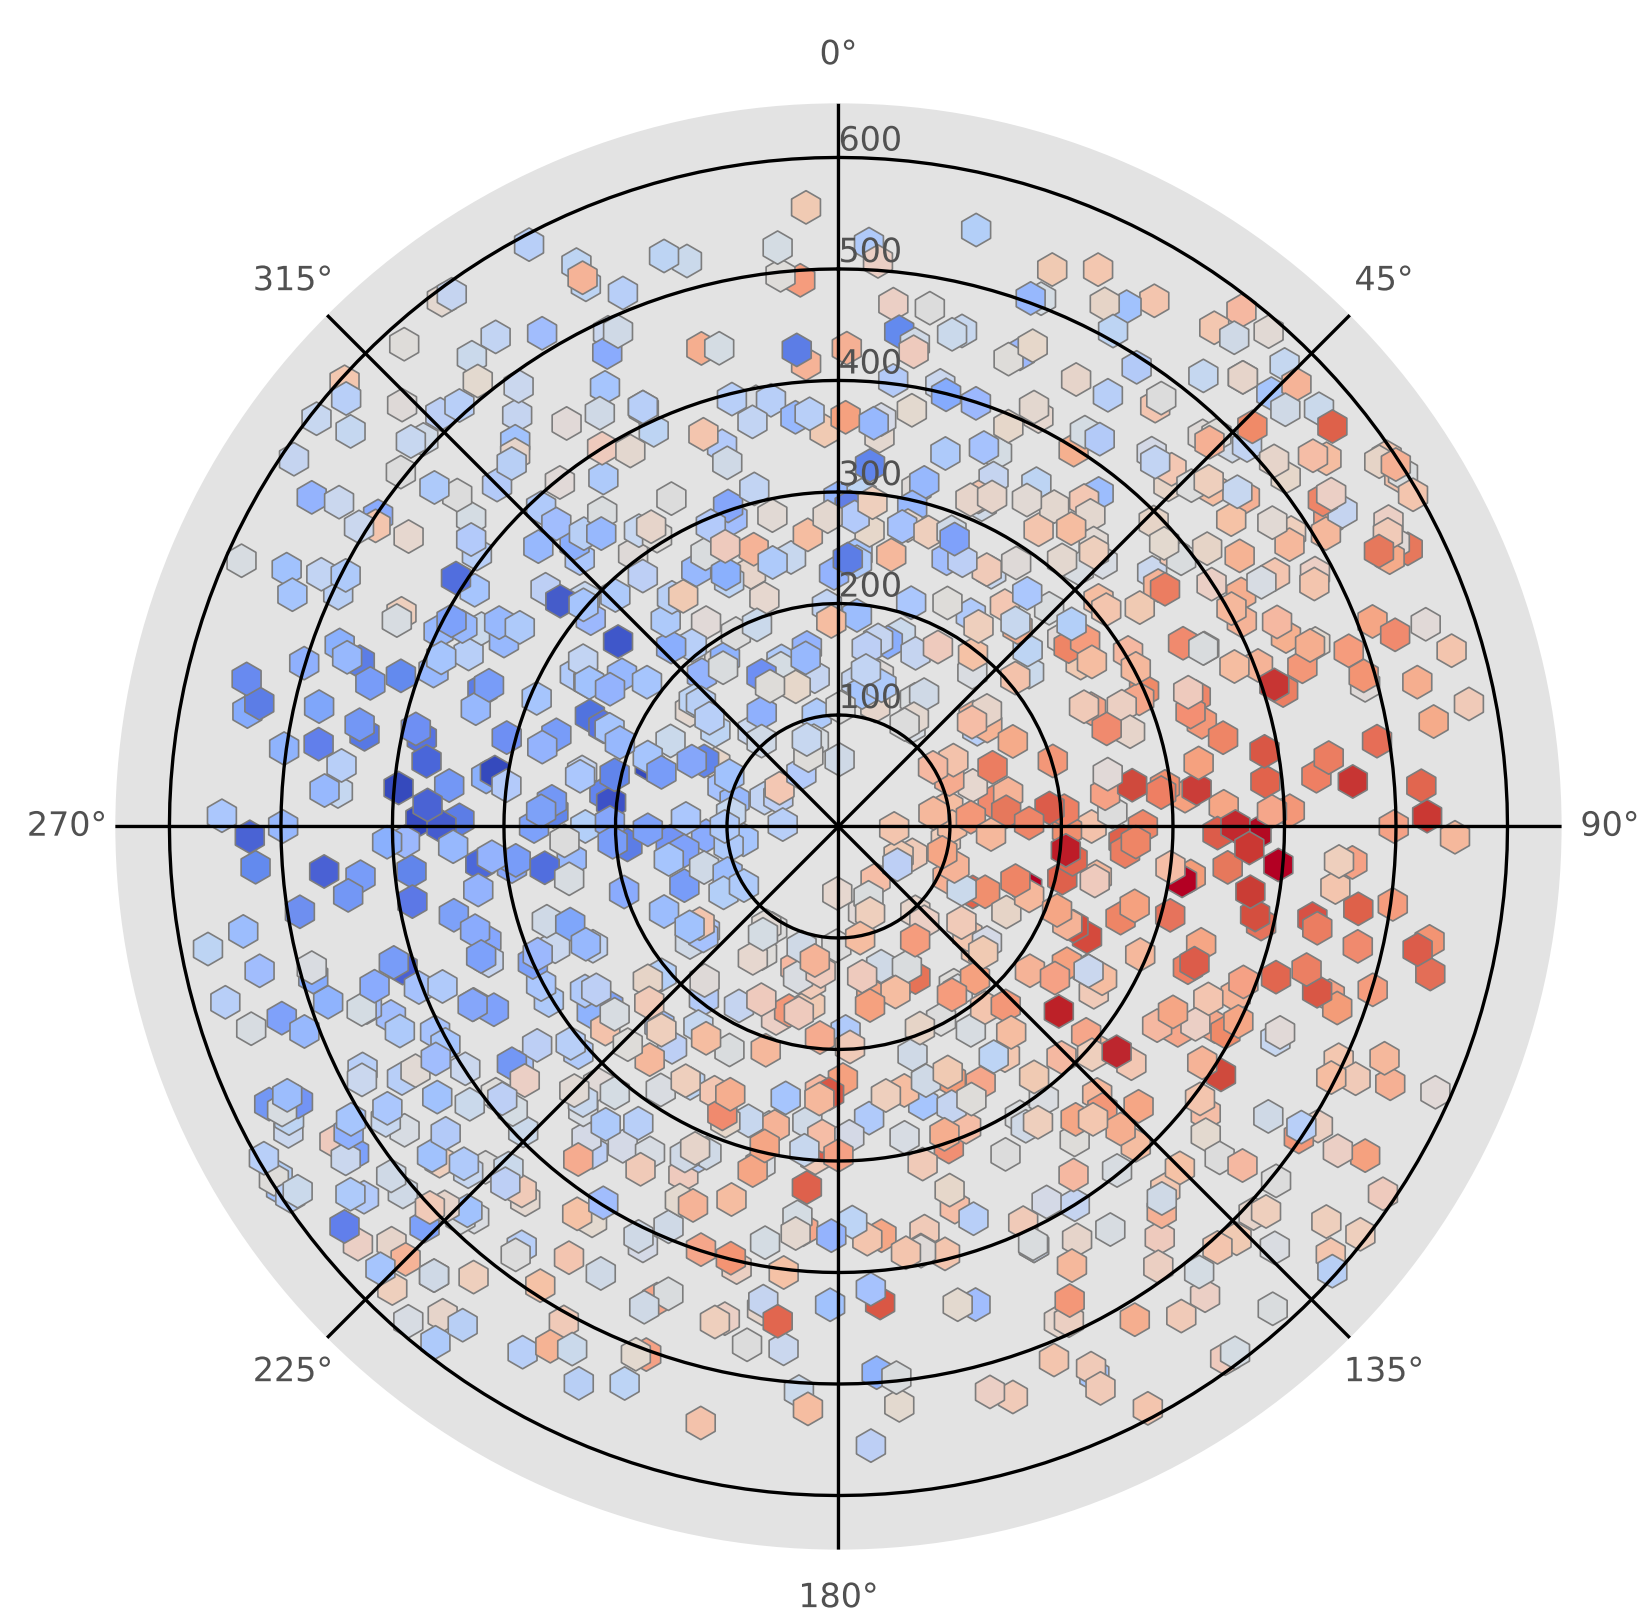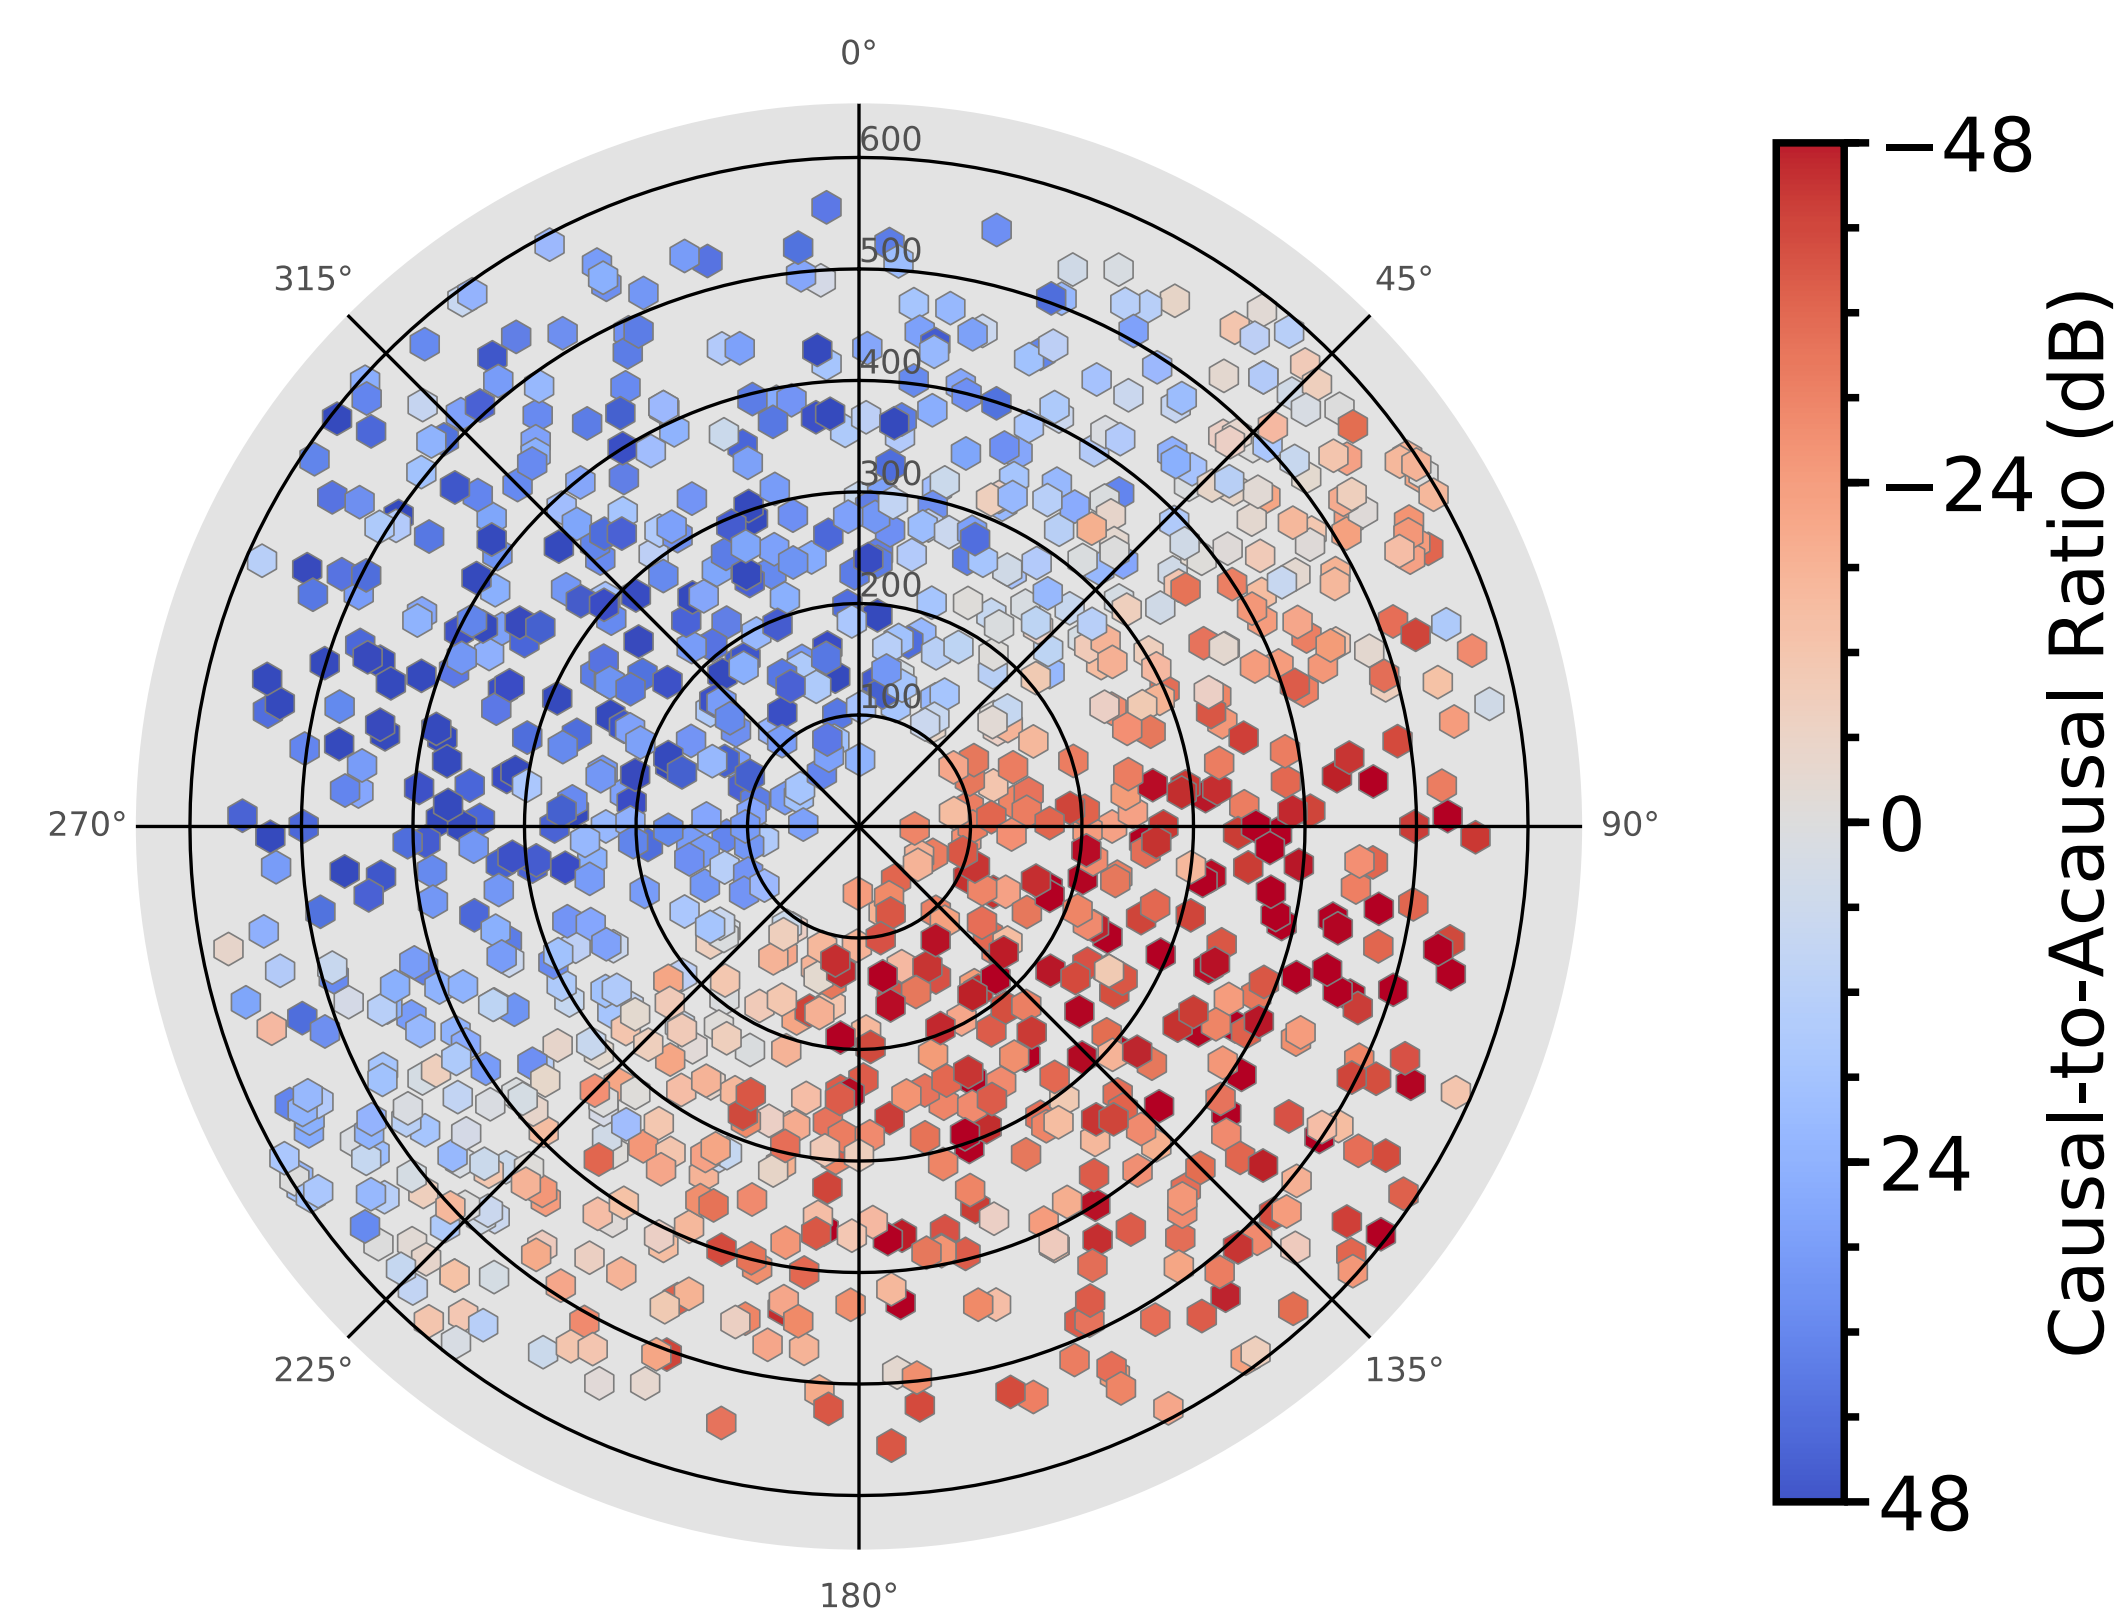

Supplement: Supplementary file 2 [file se-12-1051-2021-supplement.zip]

# Moho<sub>RFvANT</sub> - Moho<sub>ANT</sub>

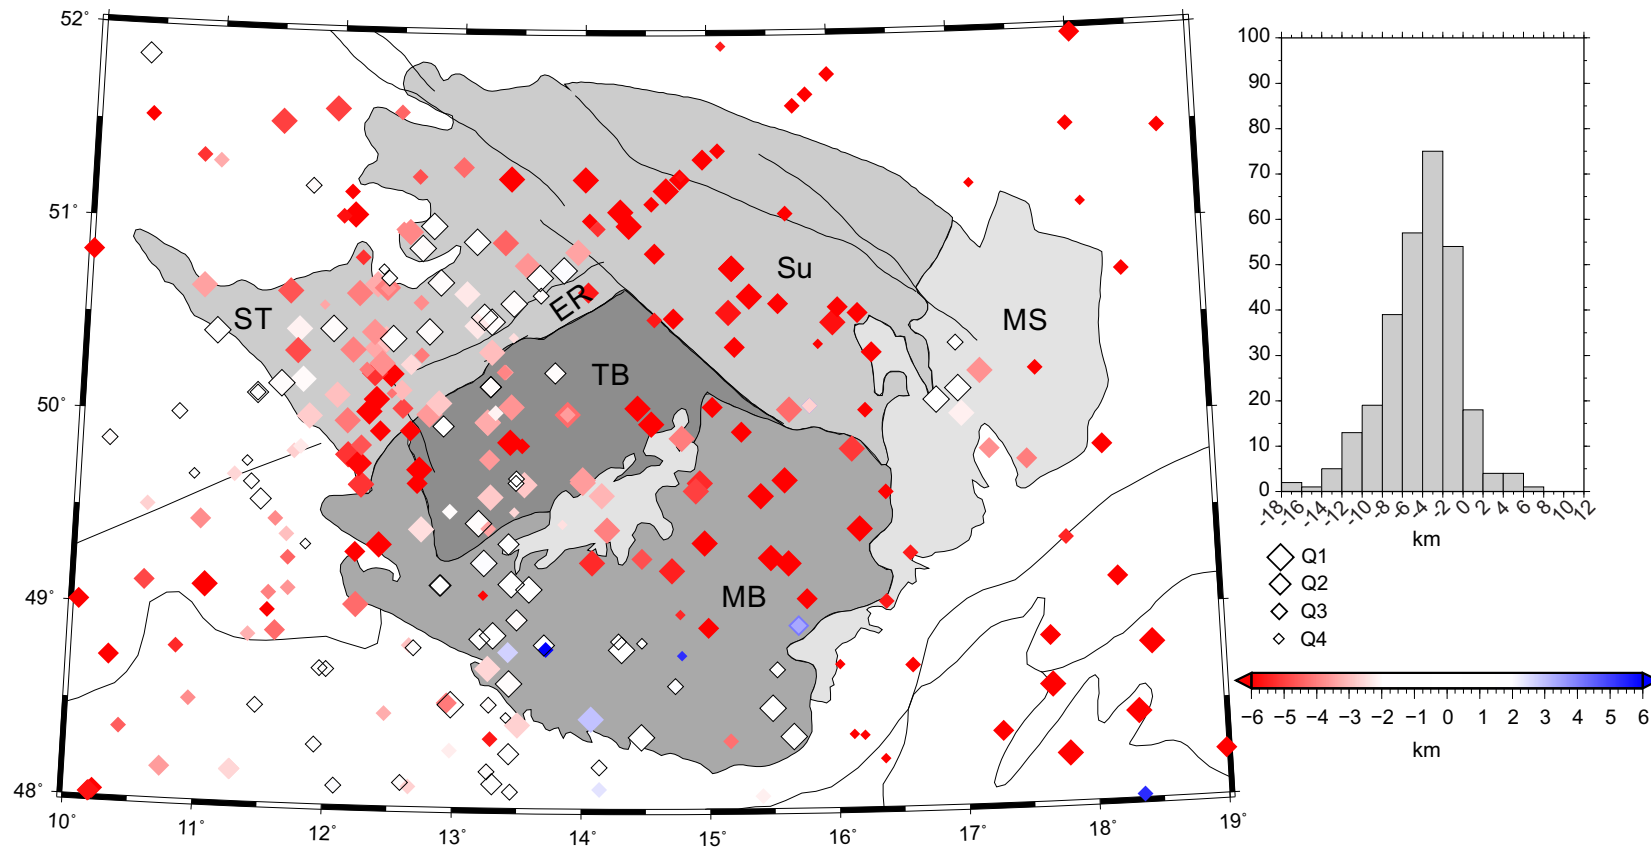

Supplement: Supplementary file 3 [file se-12-1051-2021-supplement.zip]

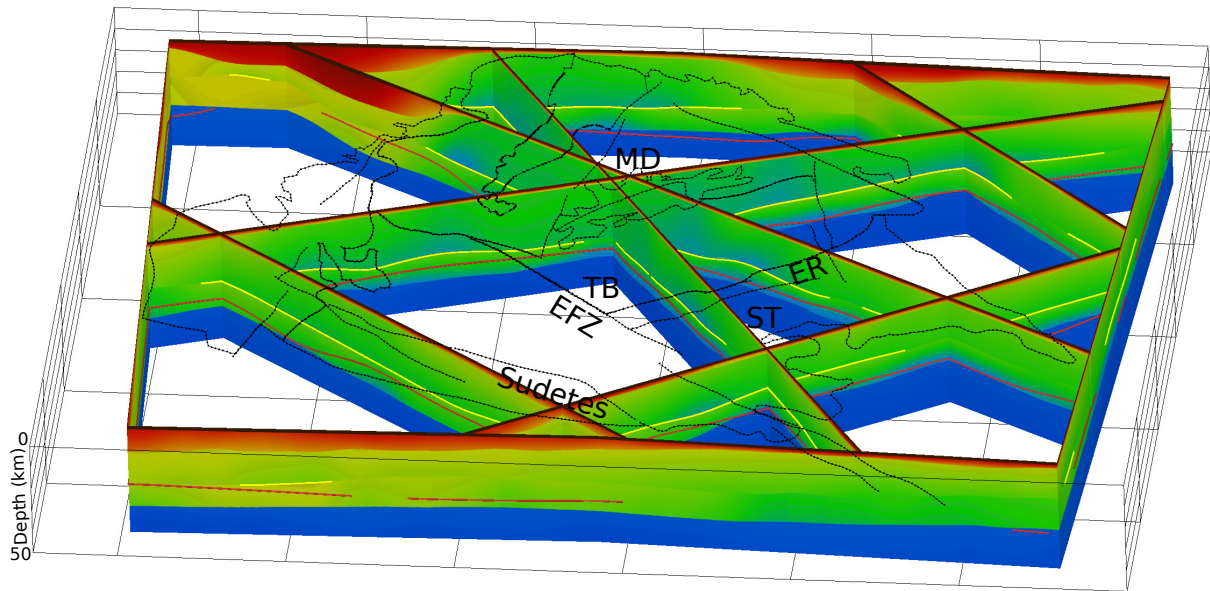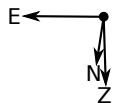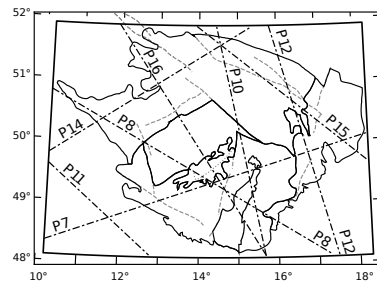

Supplement: Supplementary file 4 [file se-12-1051-2021-supplement.zip]

# Moho<sub>RF</sub> - Moho<sub>ANT</sub>

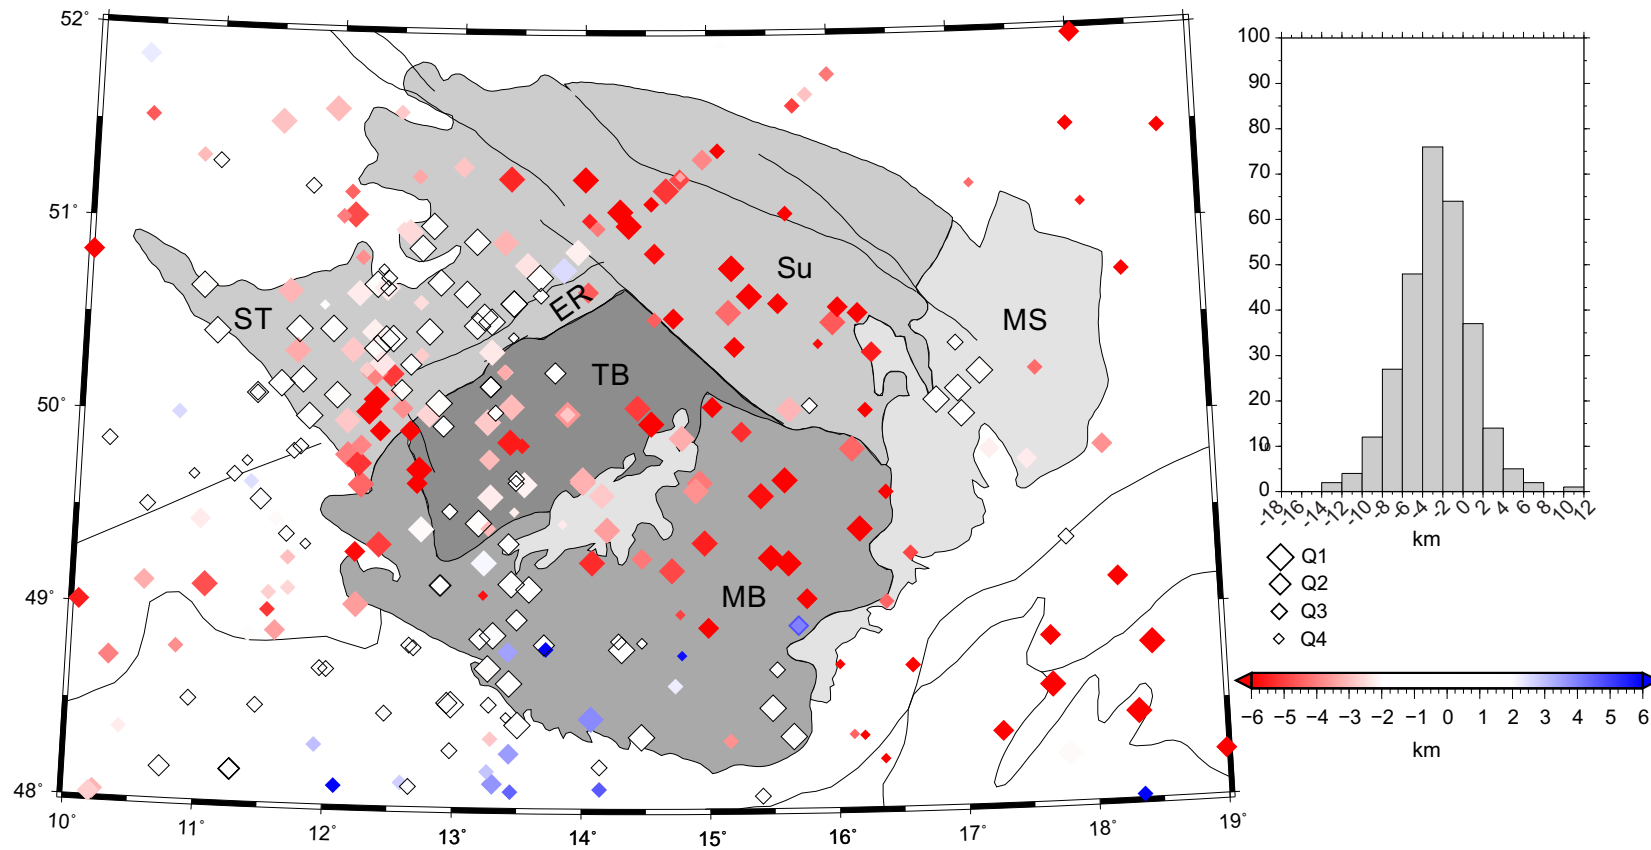

Supplement: Supplementary file 5 [file se-12-1051-2021-supplement.zip]

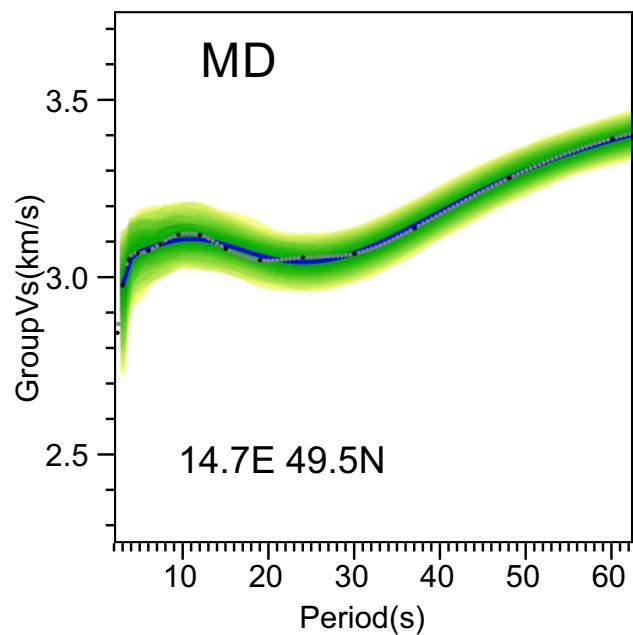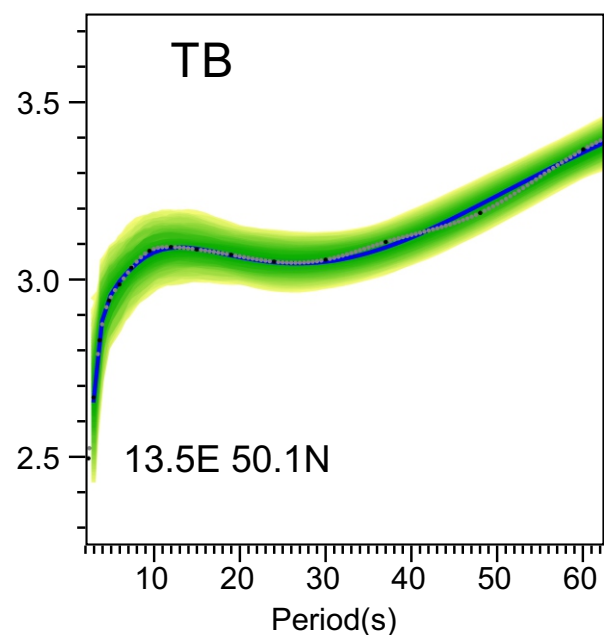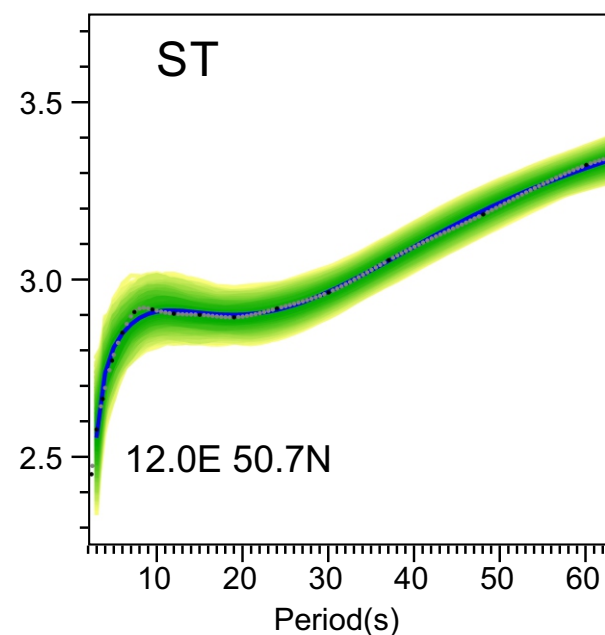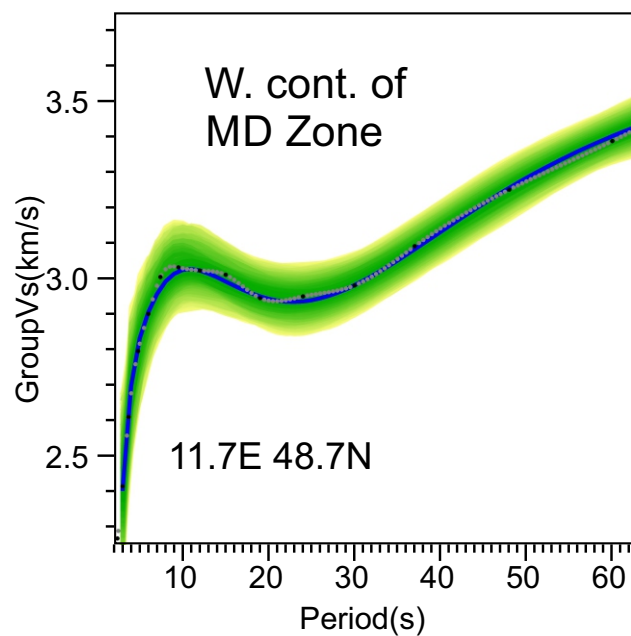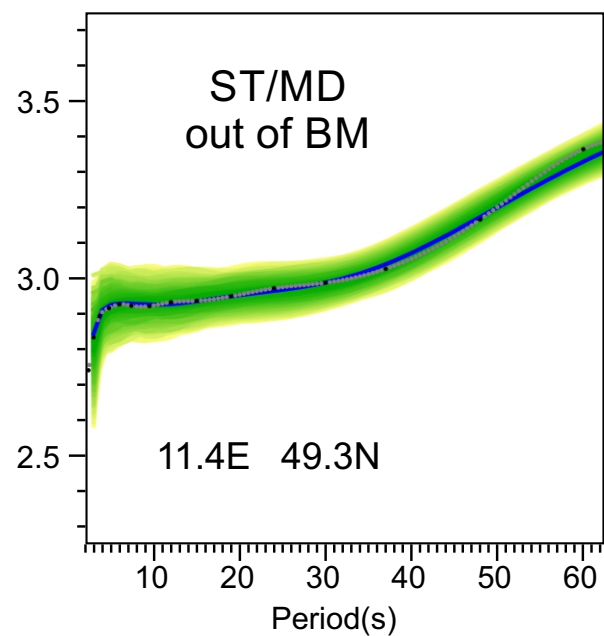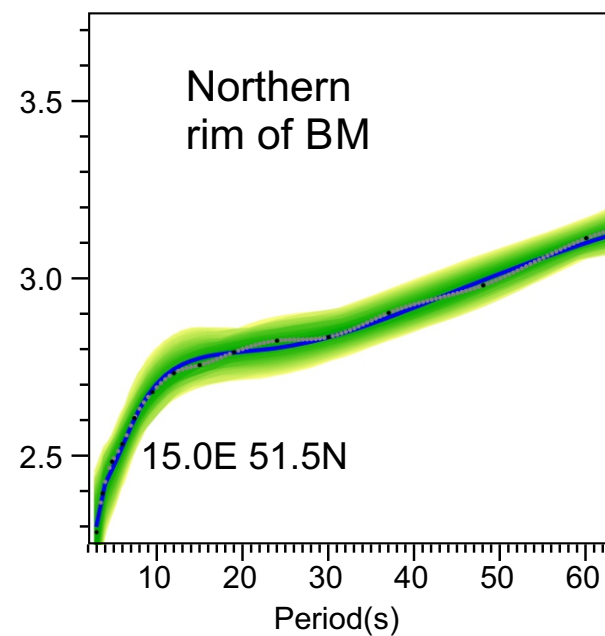

Supplement: Supplementary file 6 [file se-12-1051-2021-supplement.zip]

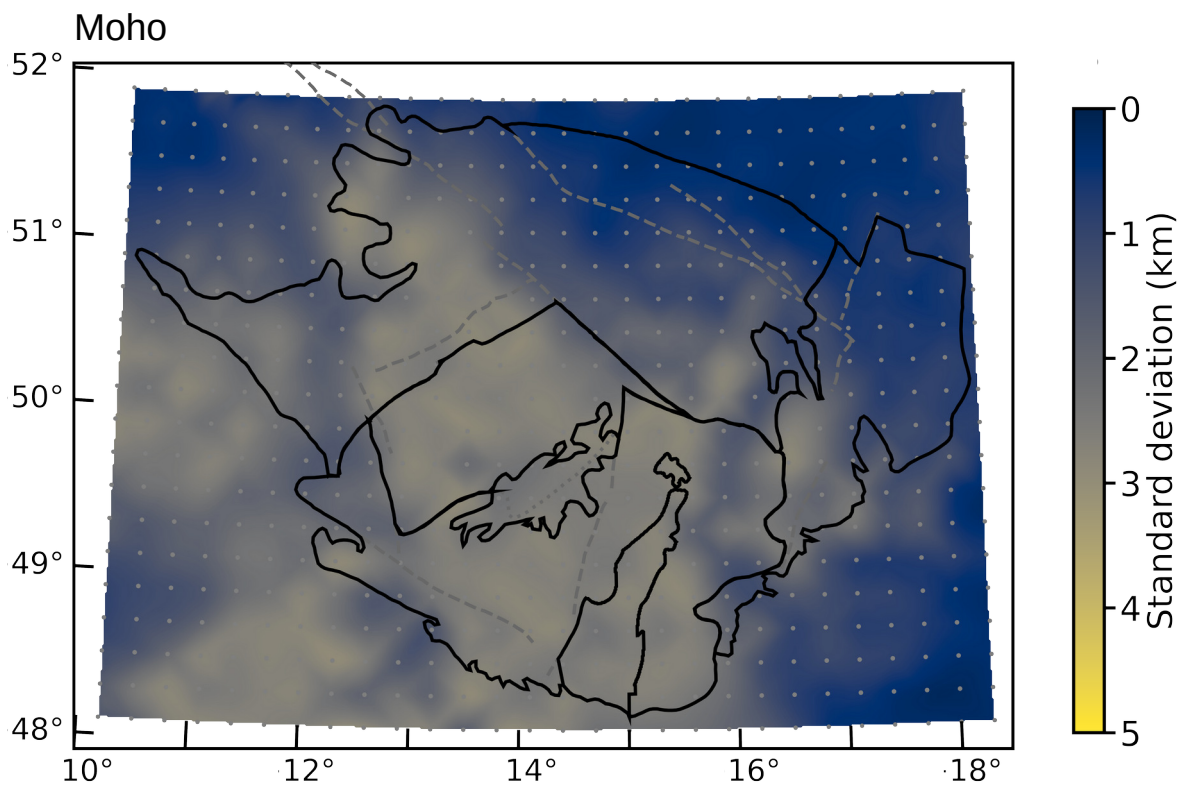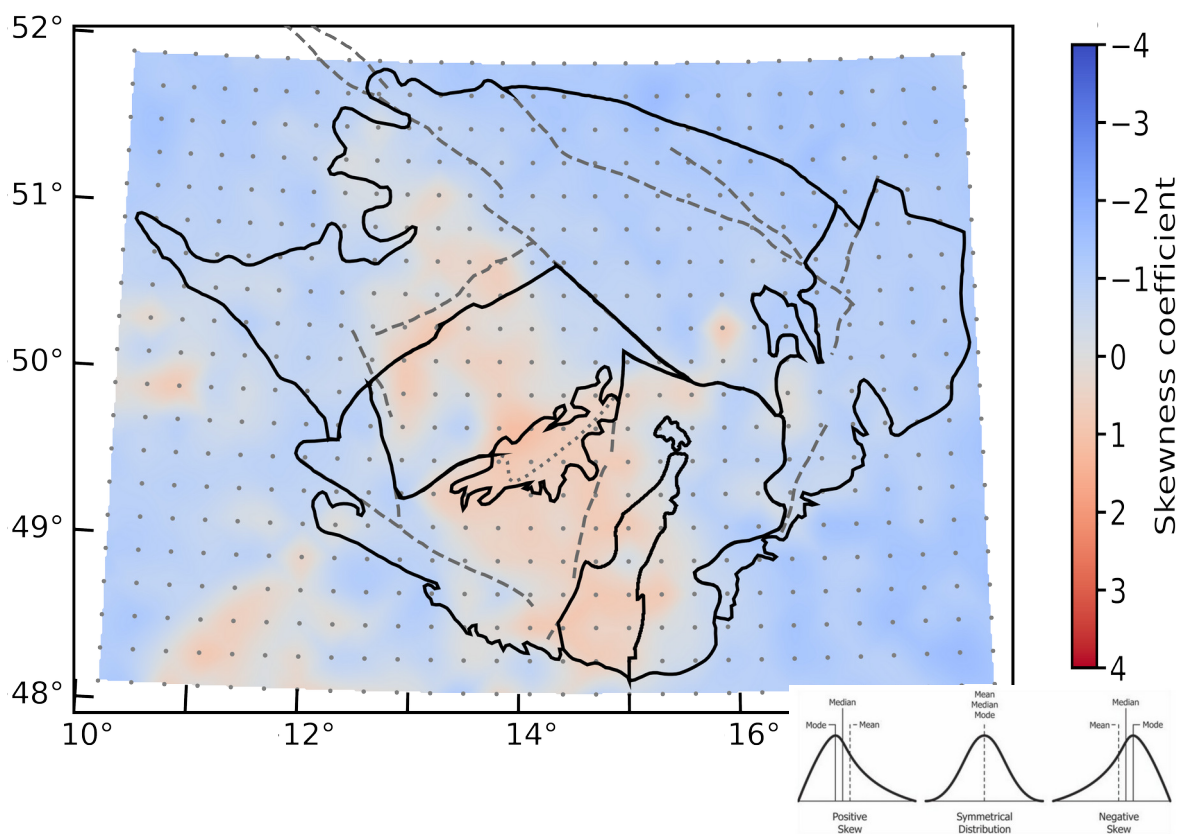

Supplement: Supplementary file 7 [file se-12-1051-2021-supplement.zip]

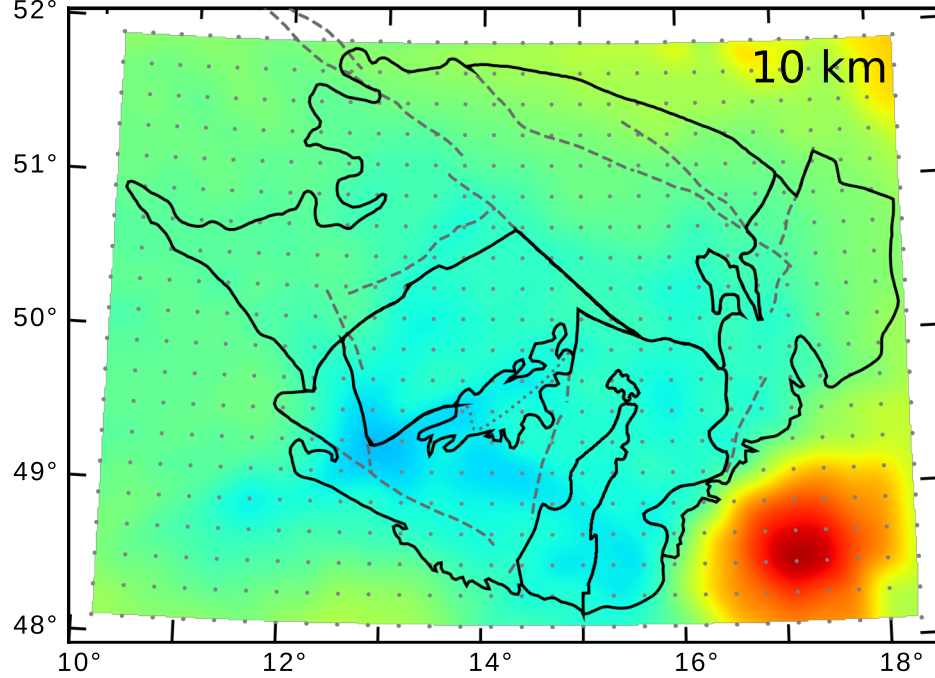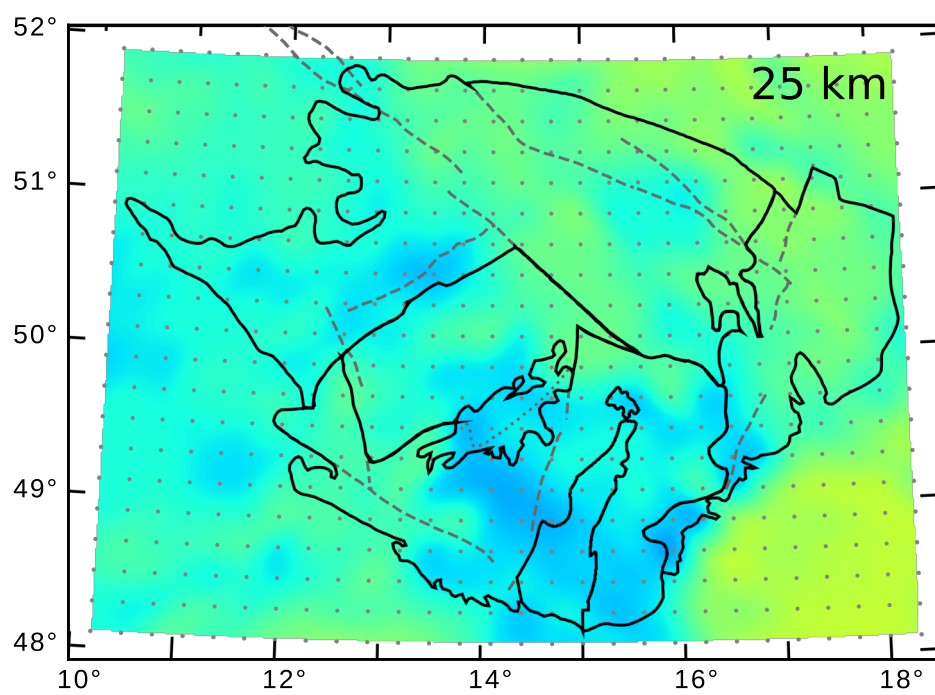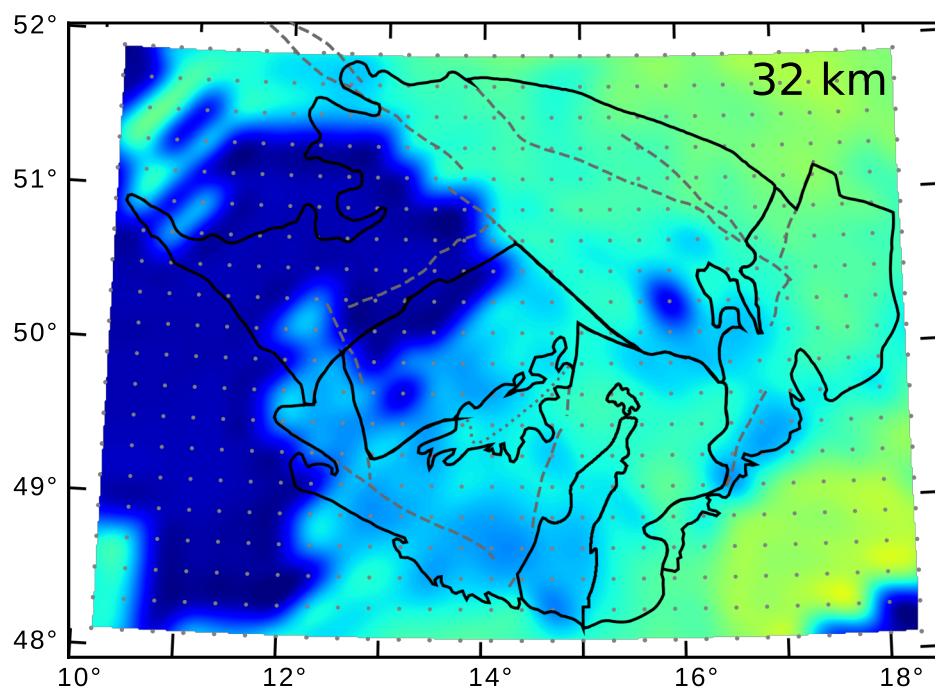

$V_s$  (km/s)

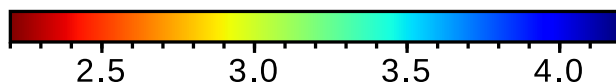

Supplement: Supplementary file 8 [file se-12-1051-2021-supplement.zip]

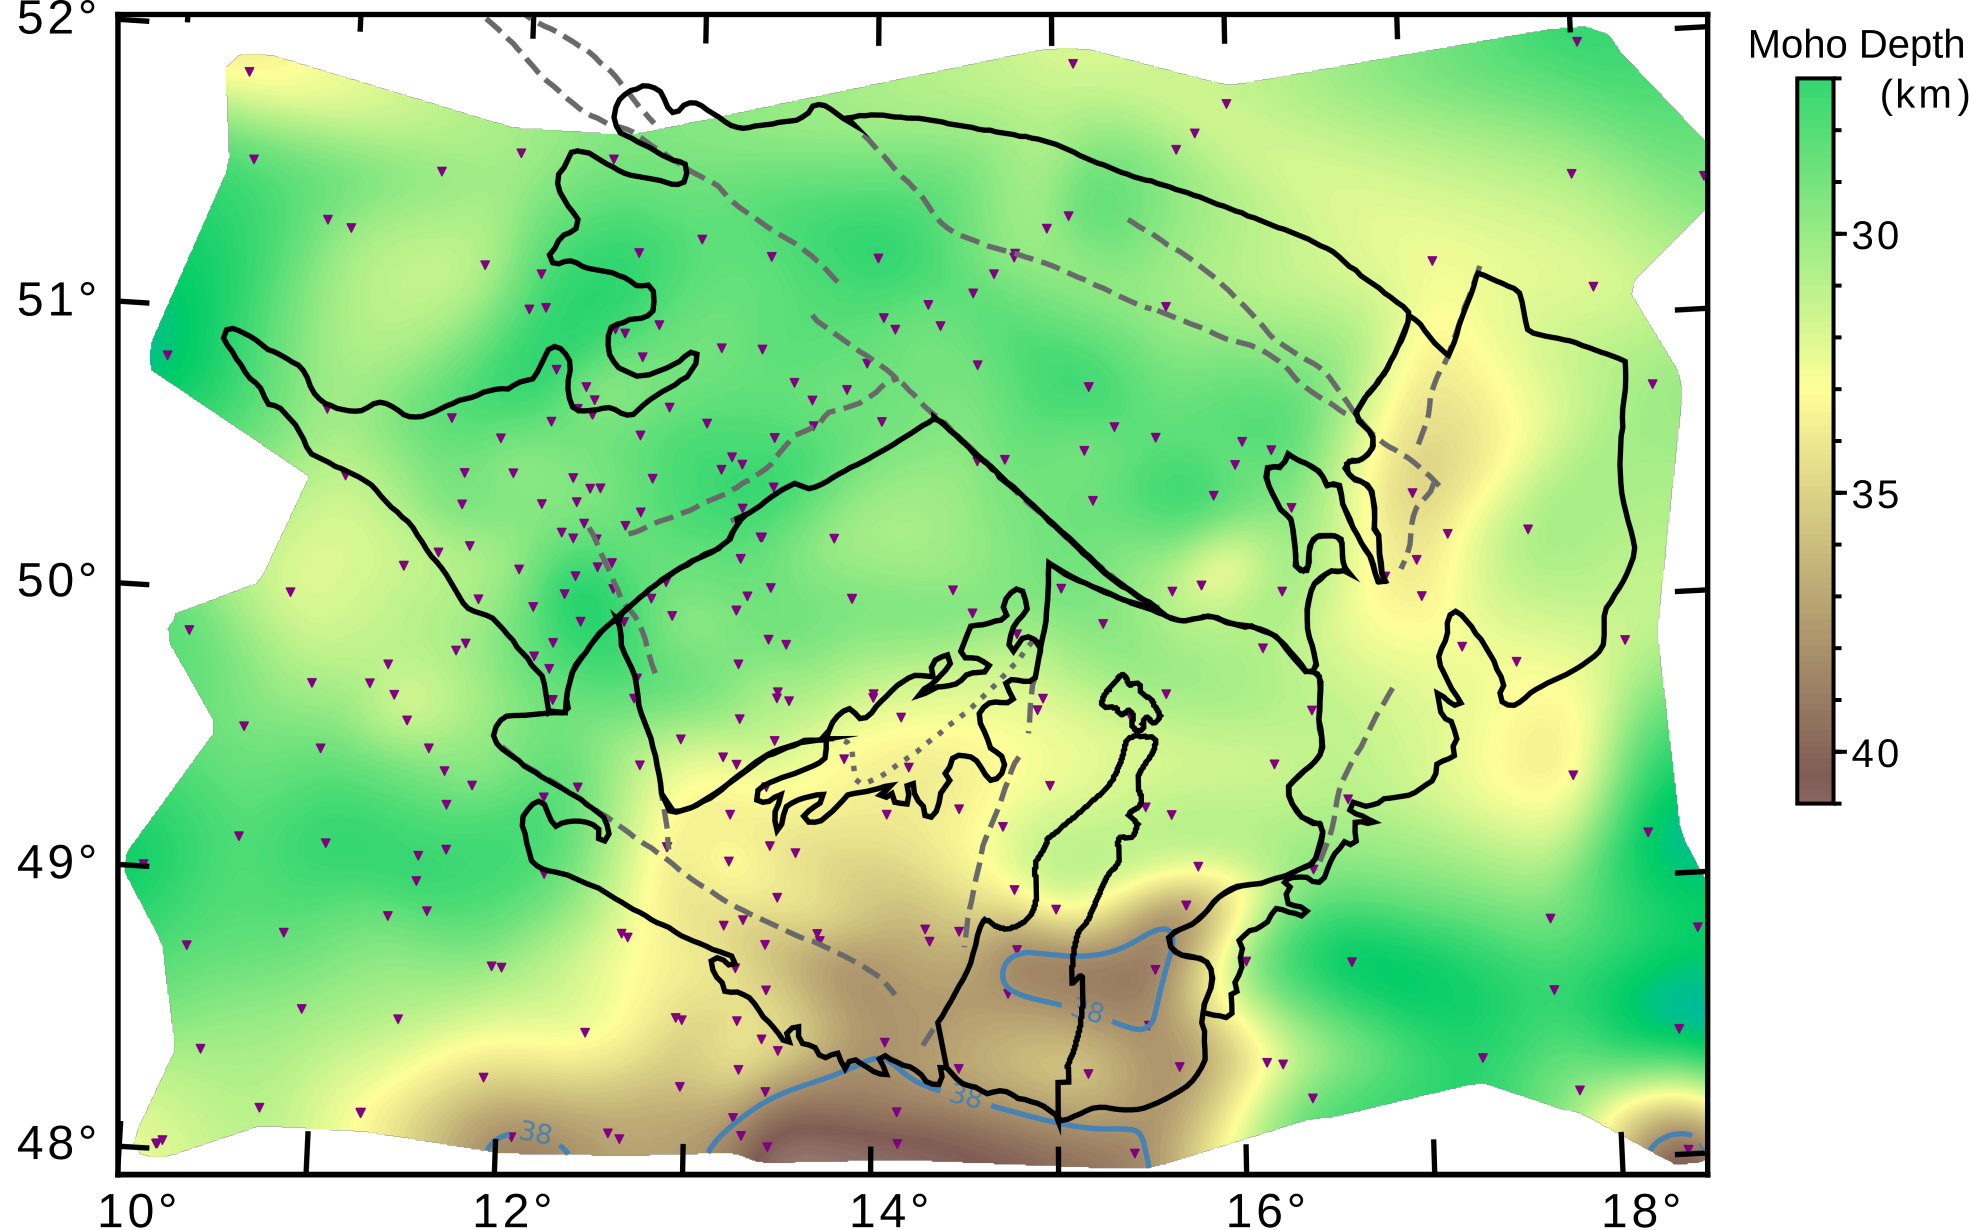

Supplement: Supplementary file 9 [file se-12-1051-2021-supplement.zip]

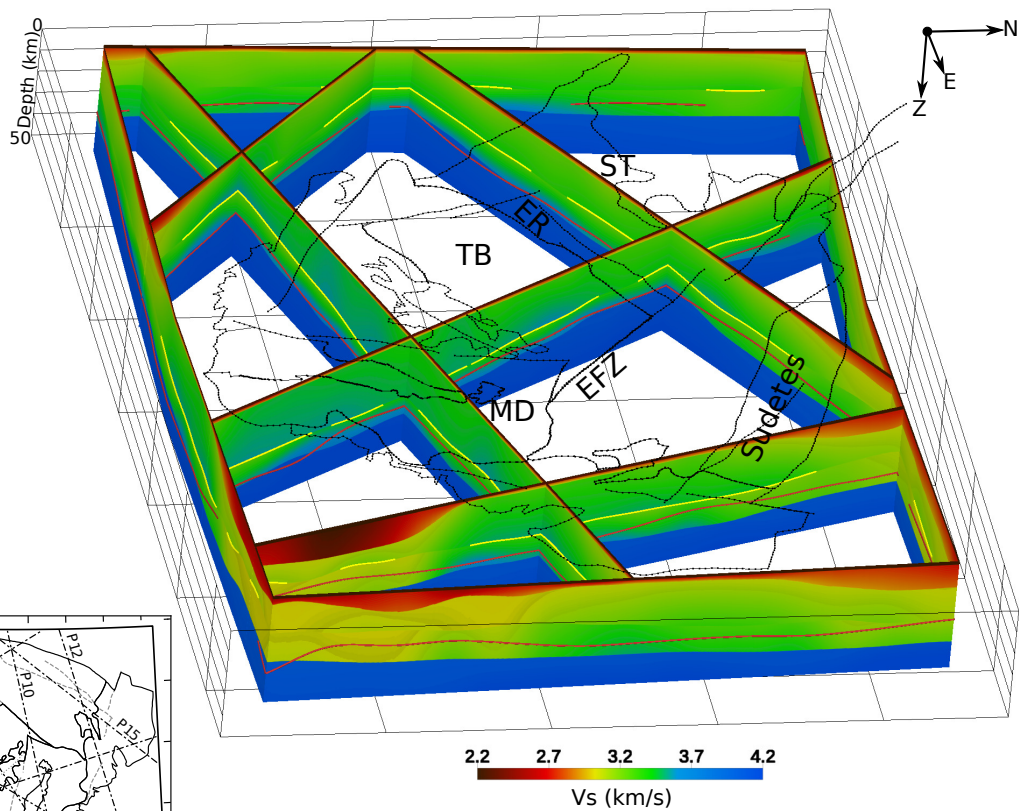

Supplement: Supplementary file 10 [file se-12-1051-2021-supplement.zip]

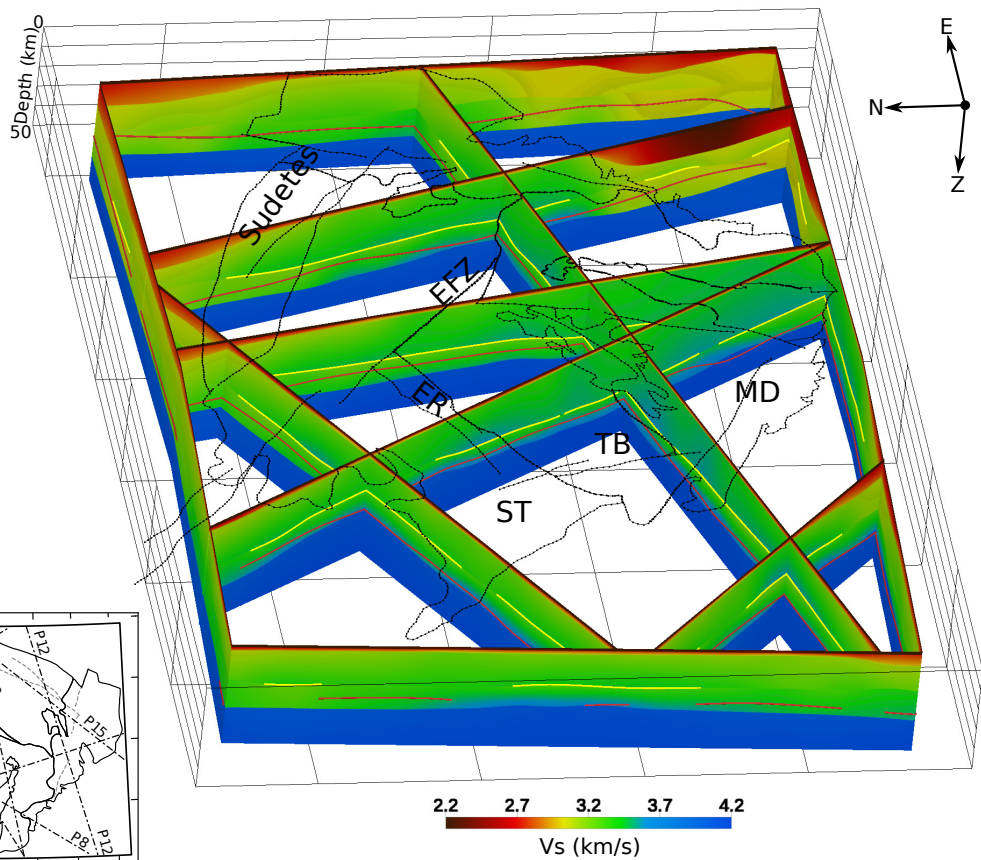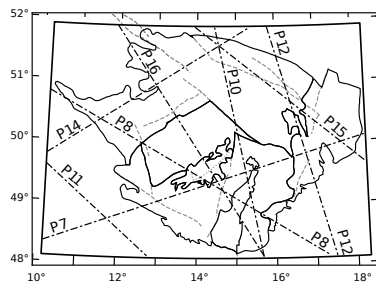

Supplement: Supplementary file 11 [file se-12-1051-2021-supplement.zip]

Depth of UPC/LPC interface

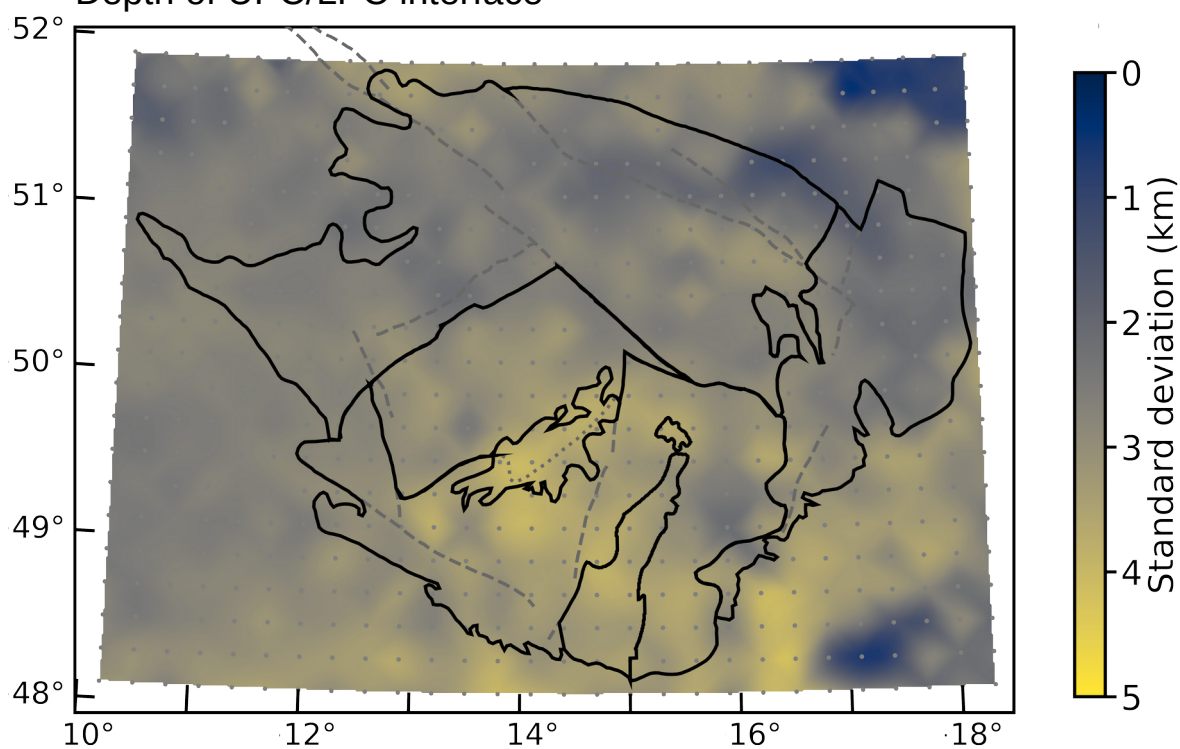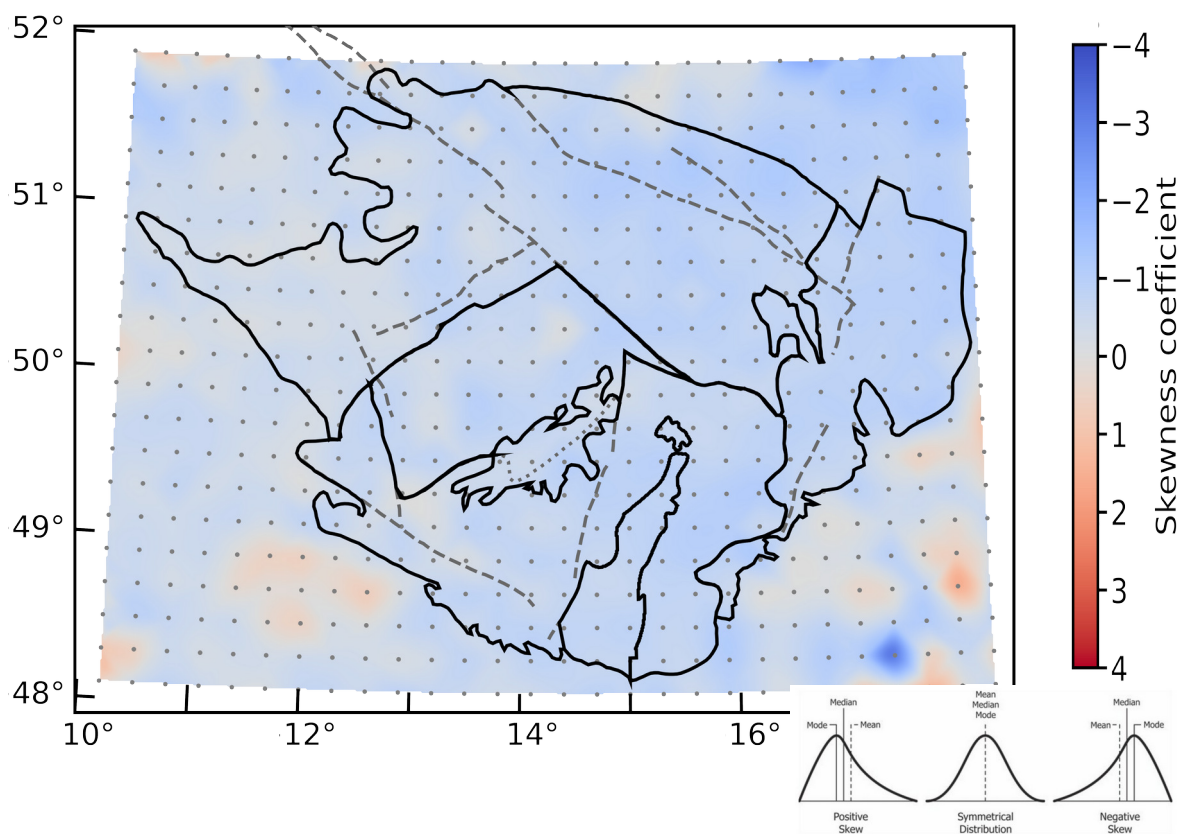

Supplement: Supplementary file 12 [file se-12-1051-2021-supplement.zip › Supplement_16.pdf]

a)

16.8E 49.3N

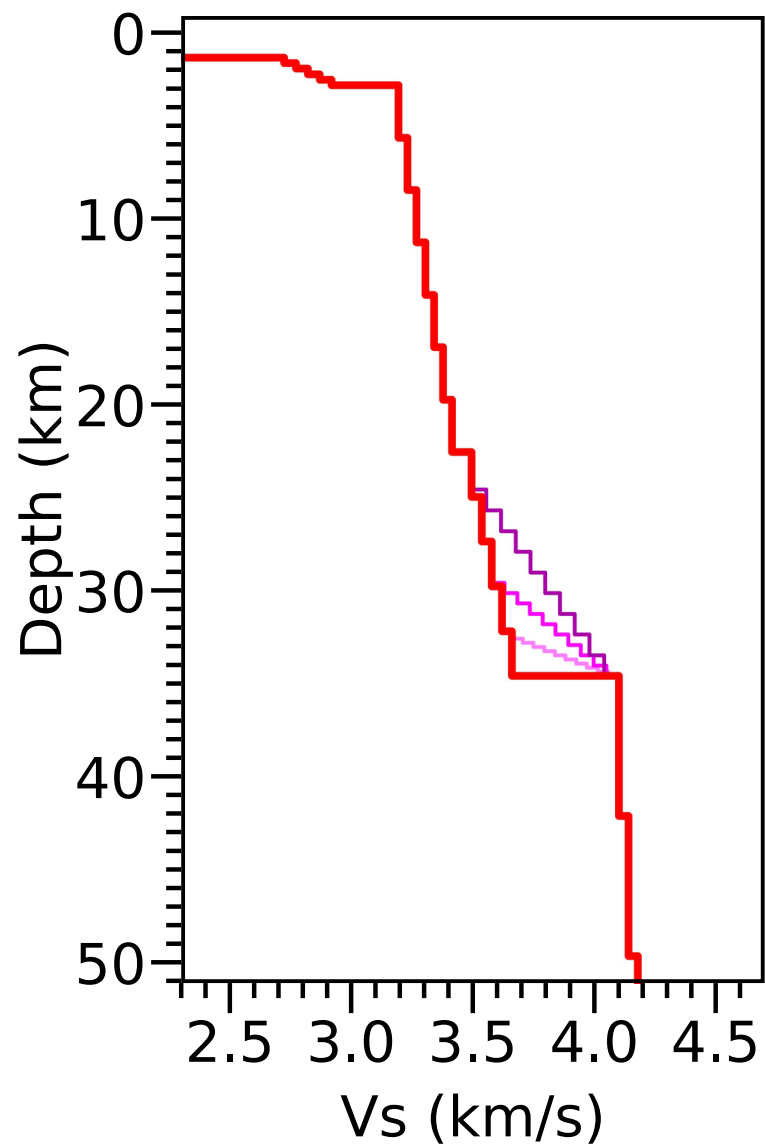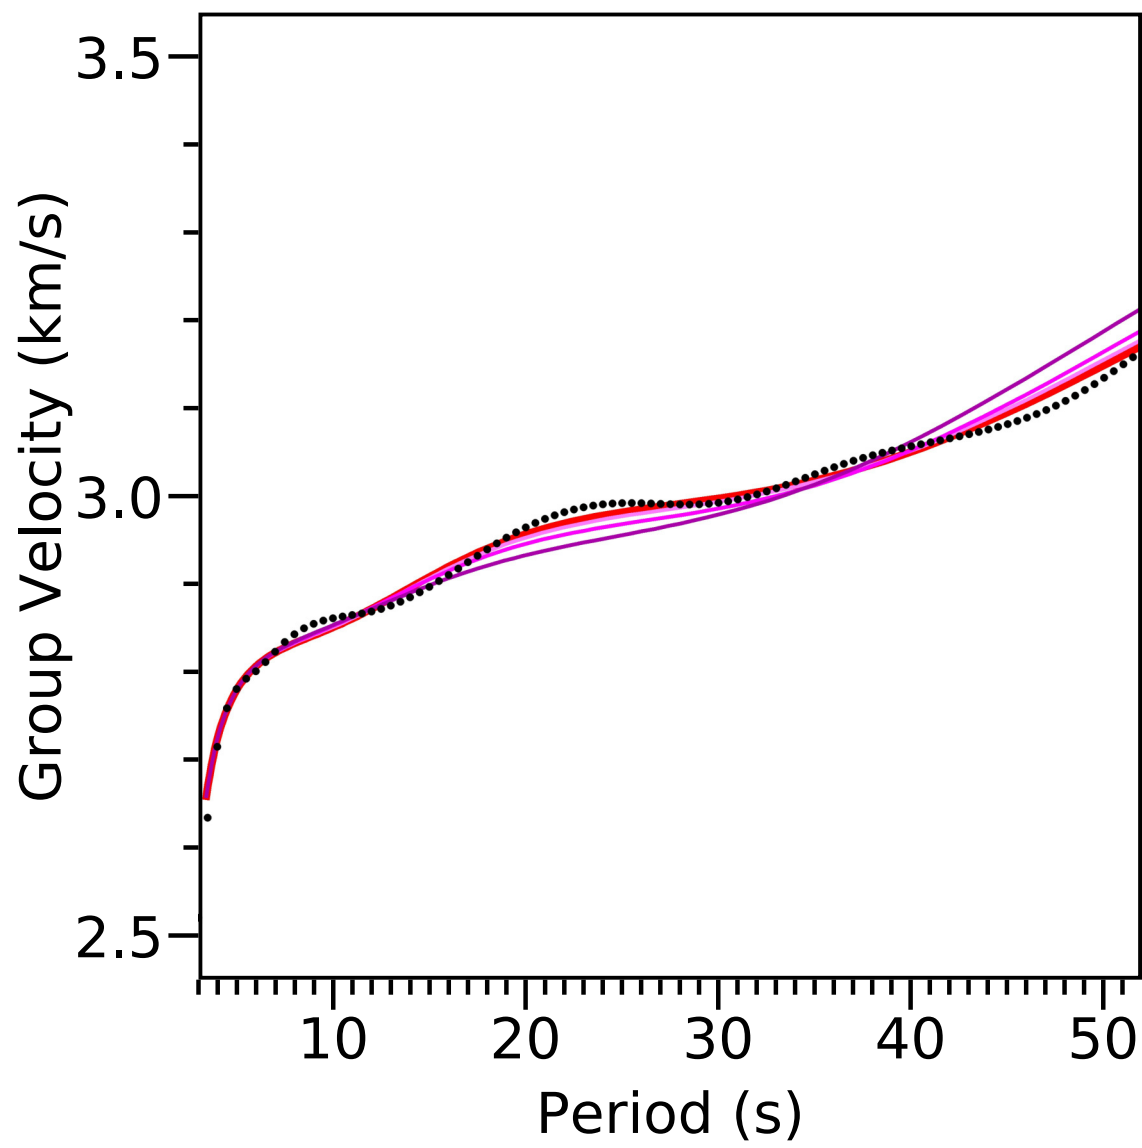

b)

15.9E 48.7N

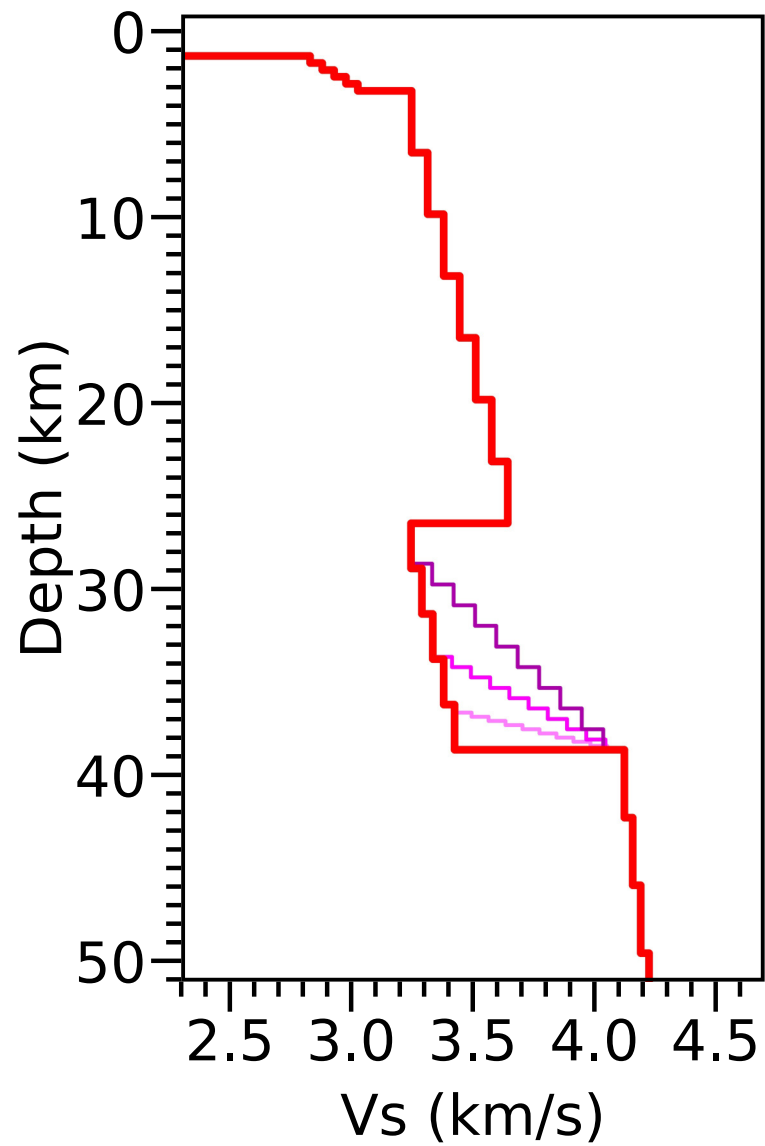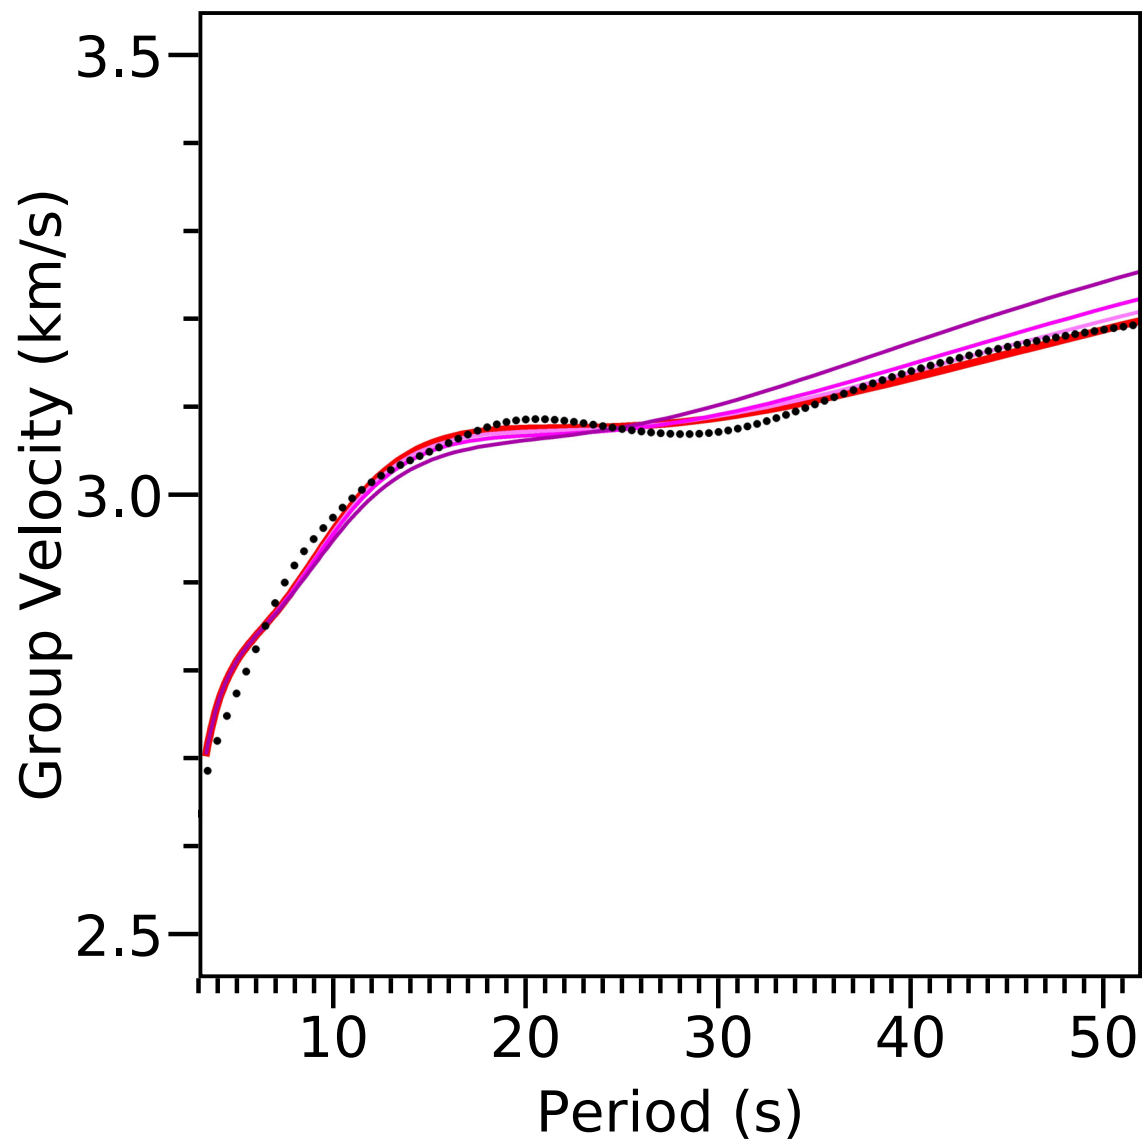

— 1-D model

..... Input

Supplement: Supplementary file 12 [file se-12-1051-2021-supplement.zip › Supplement_26.pdf]

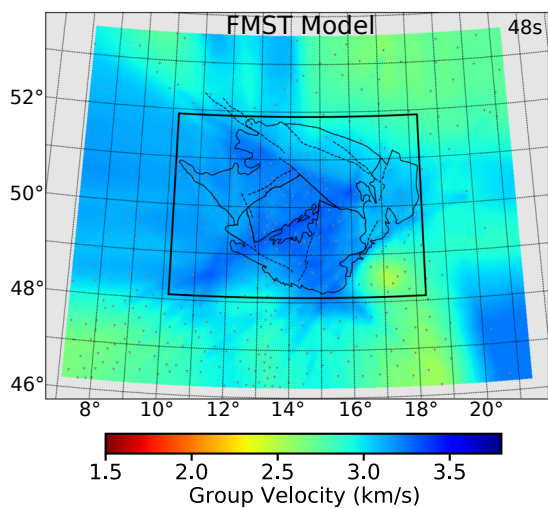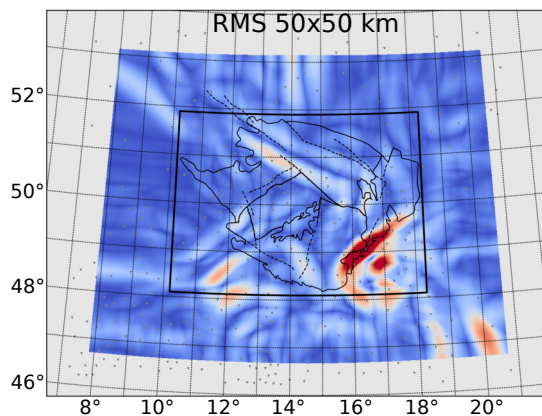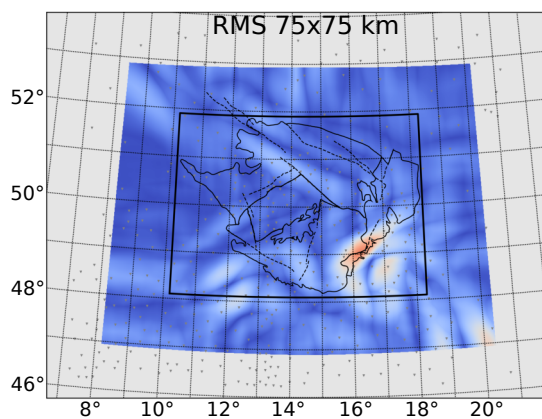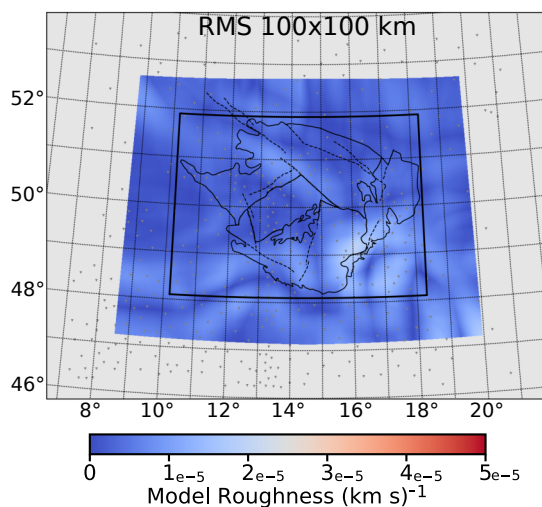

Supplement: Supplementary file 12 [file se-12-1051-2021-supplement.zip › Supplement_11.pdf]

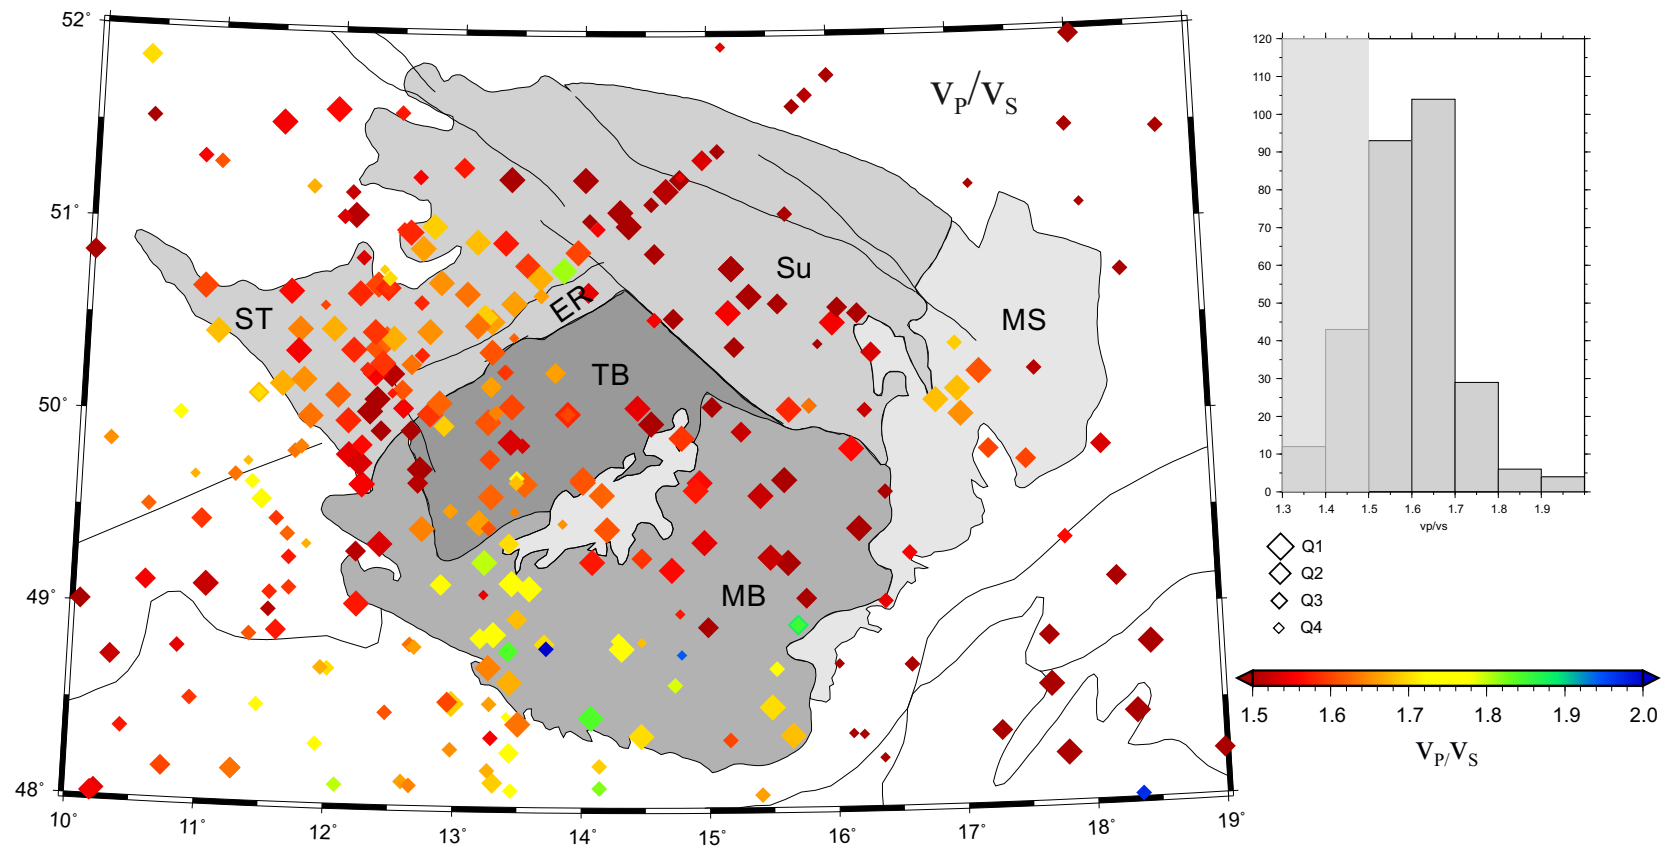

Supplement: Supplementary file 12 [file se-12-1051-2021-supplement.zip › Supplement_24.pdf]

Band-pass filter: 5-50 s

Summer

a)

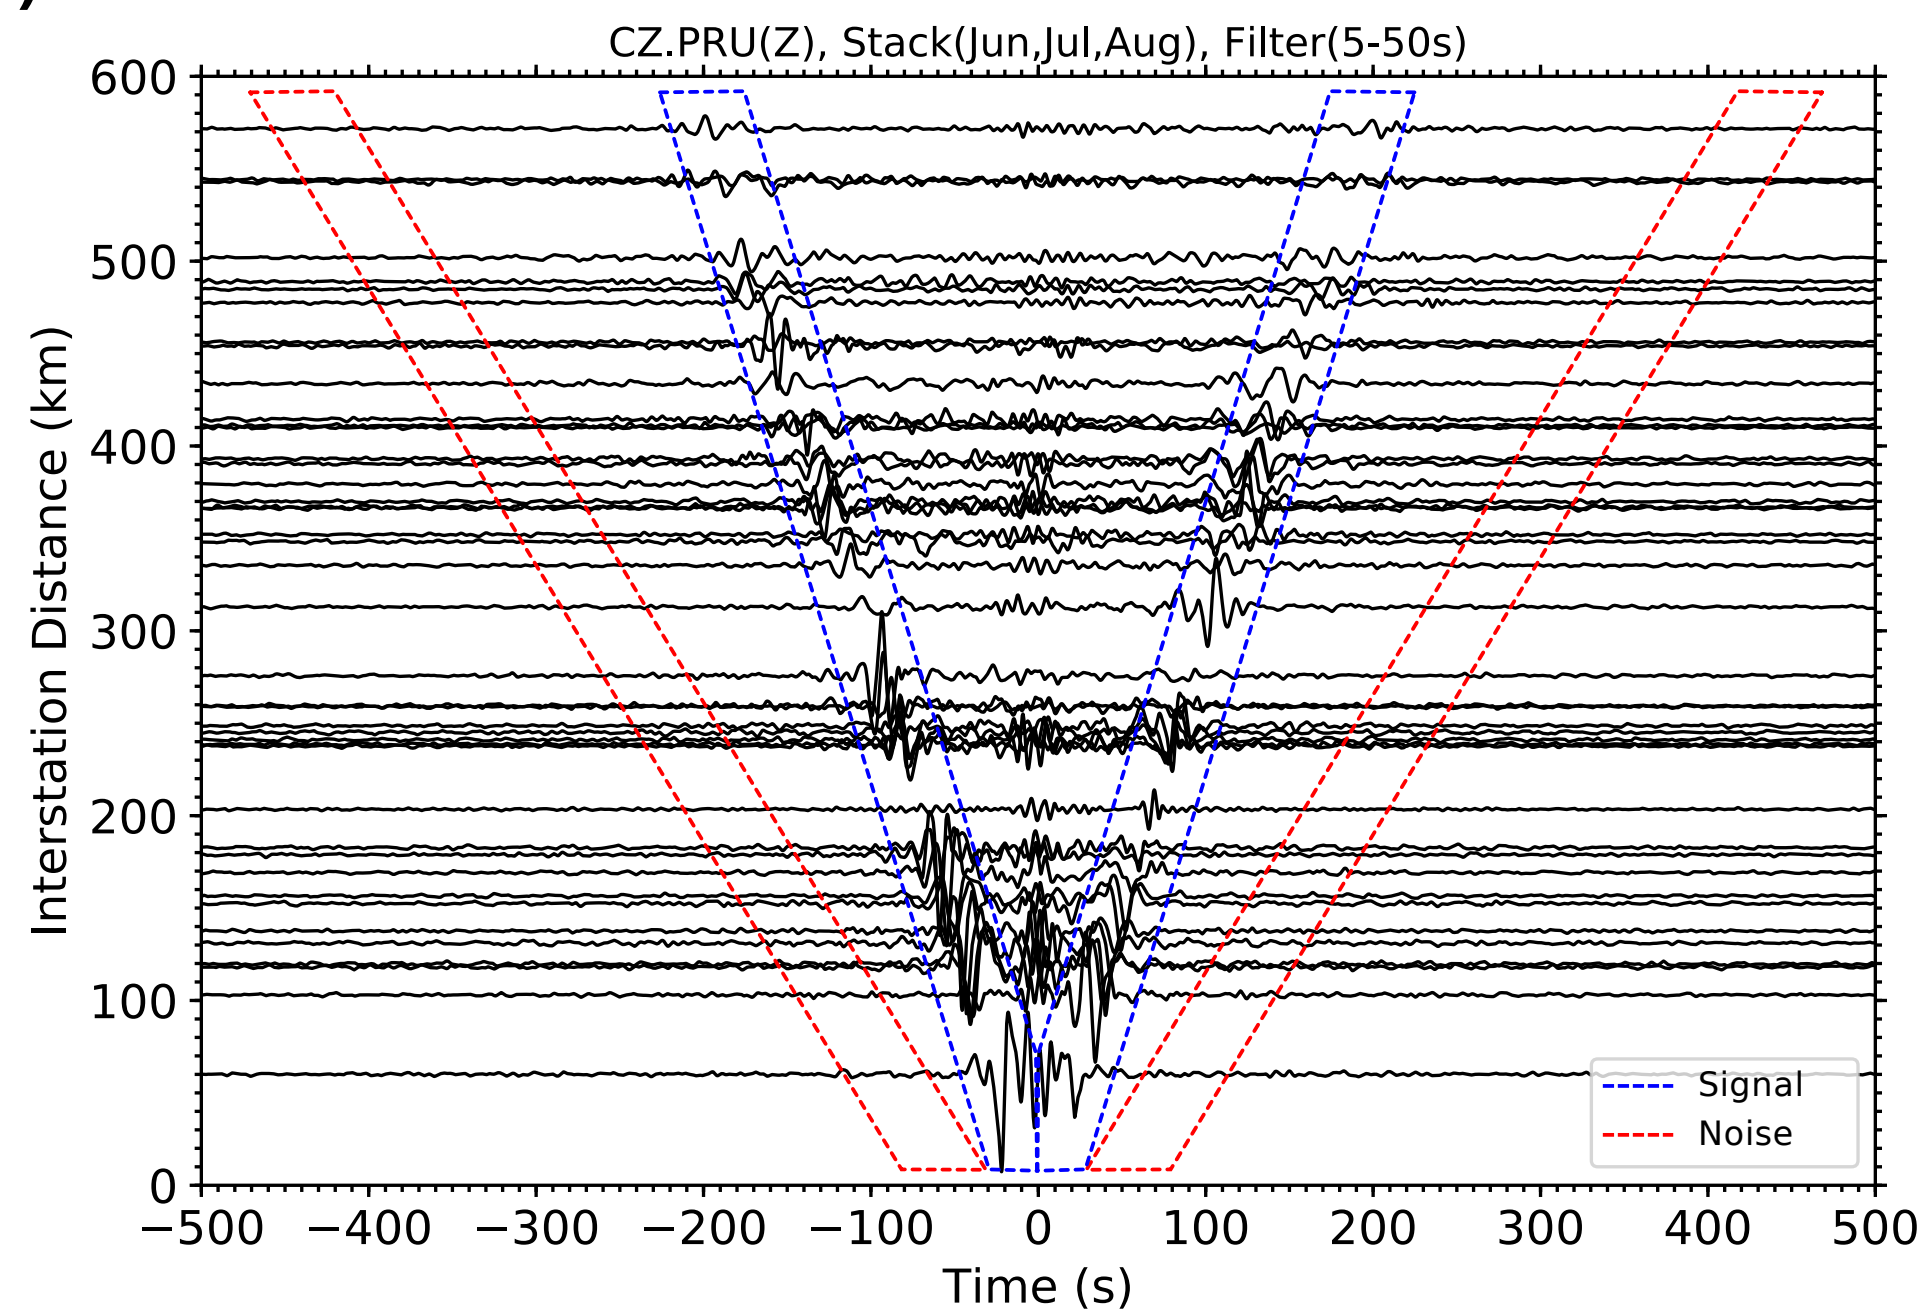

Winter

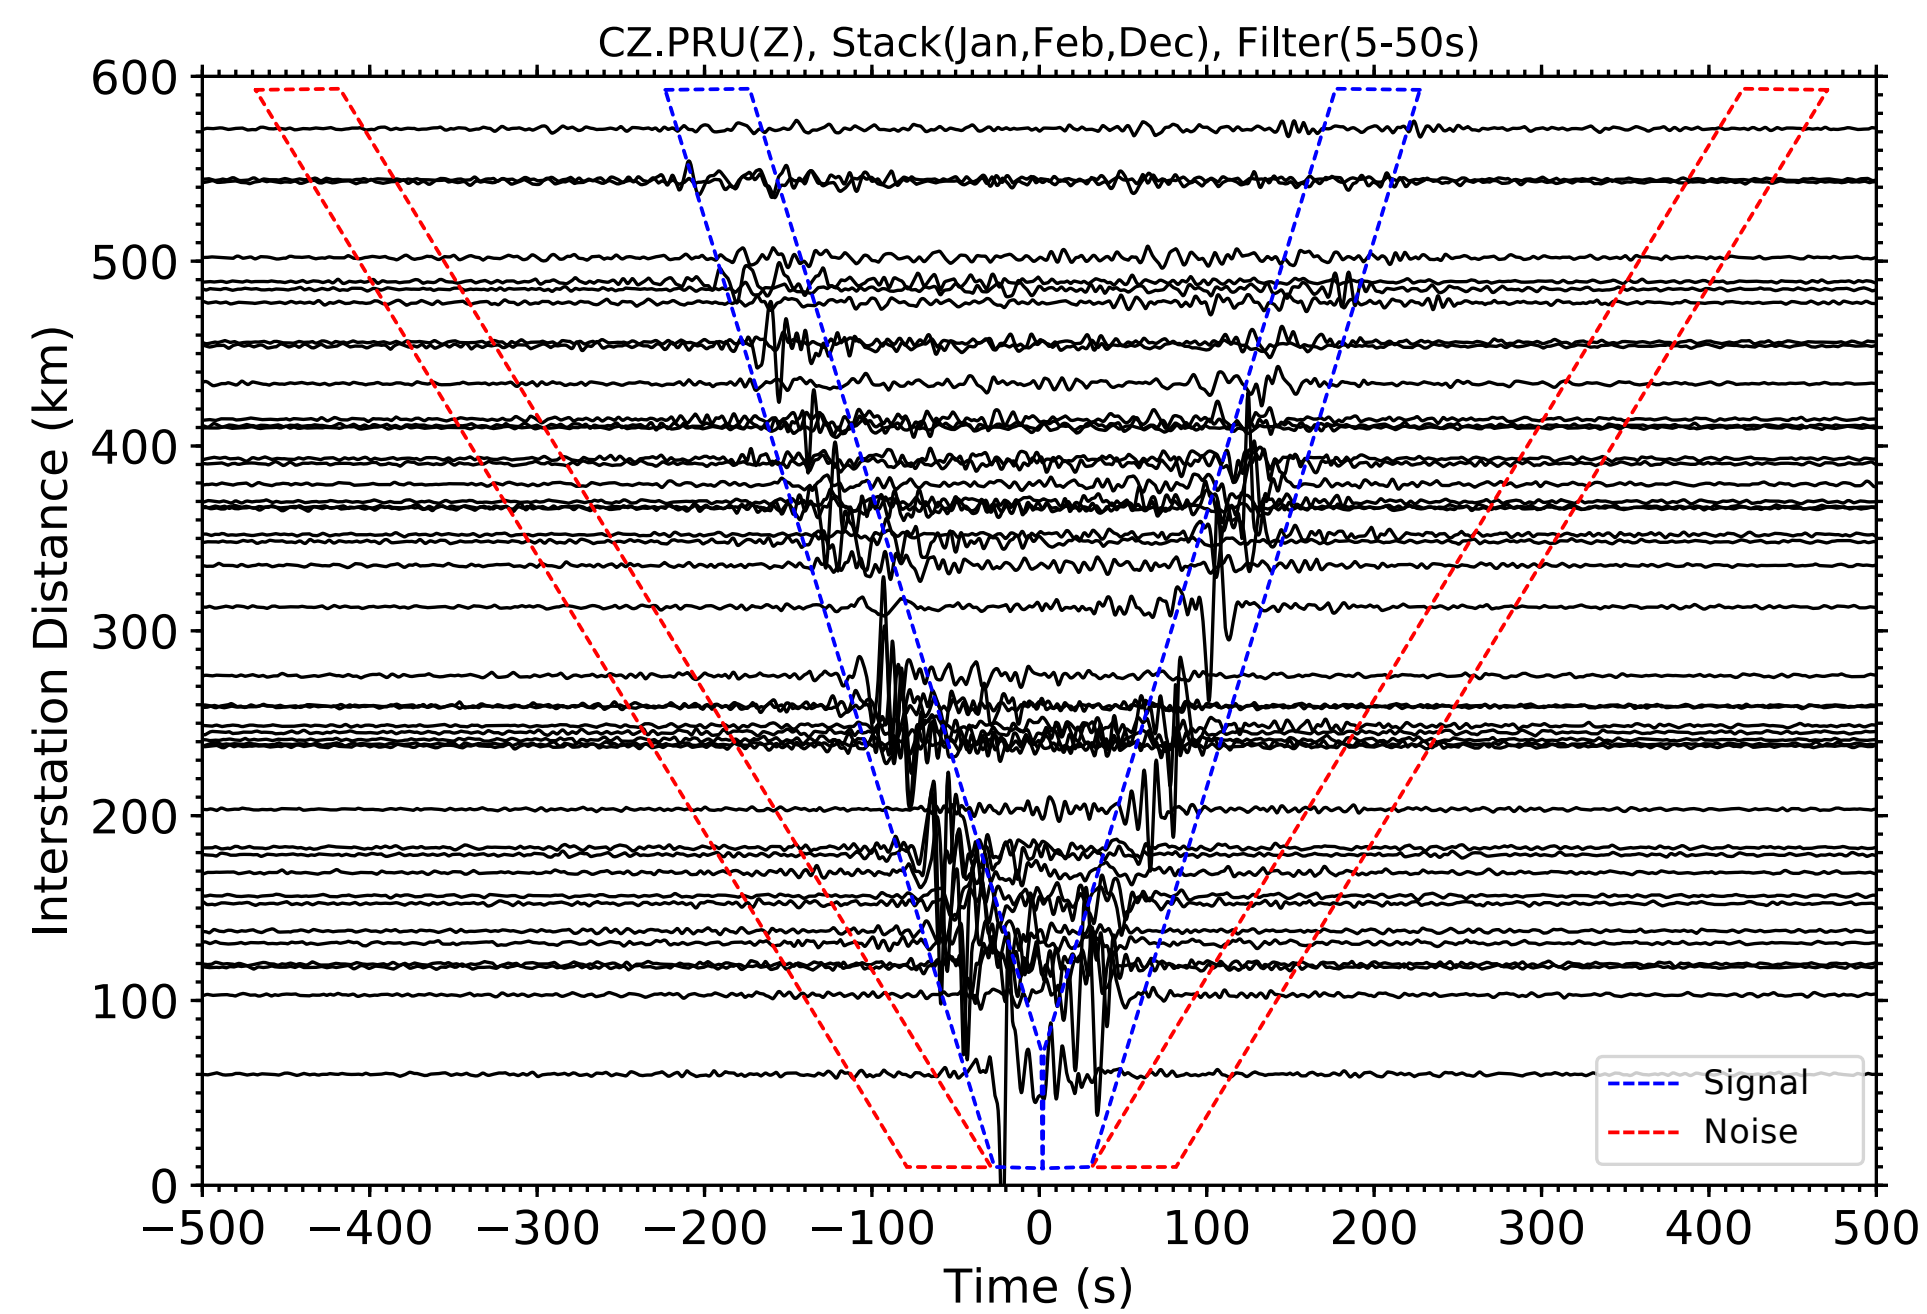

b)

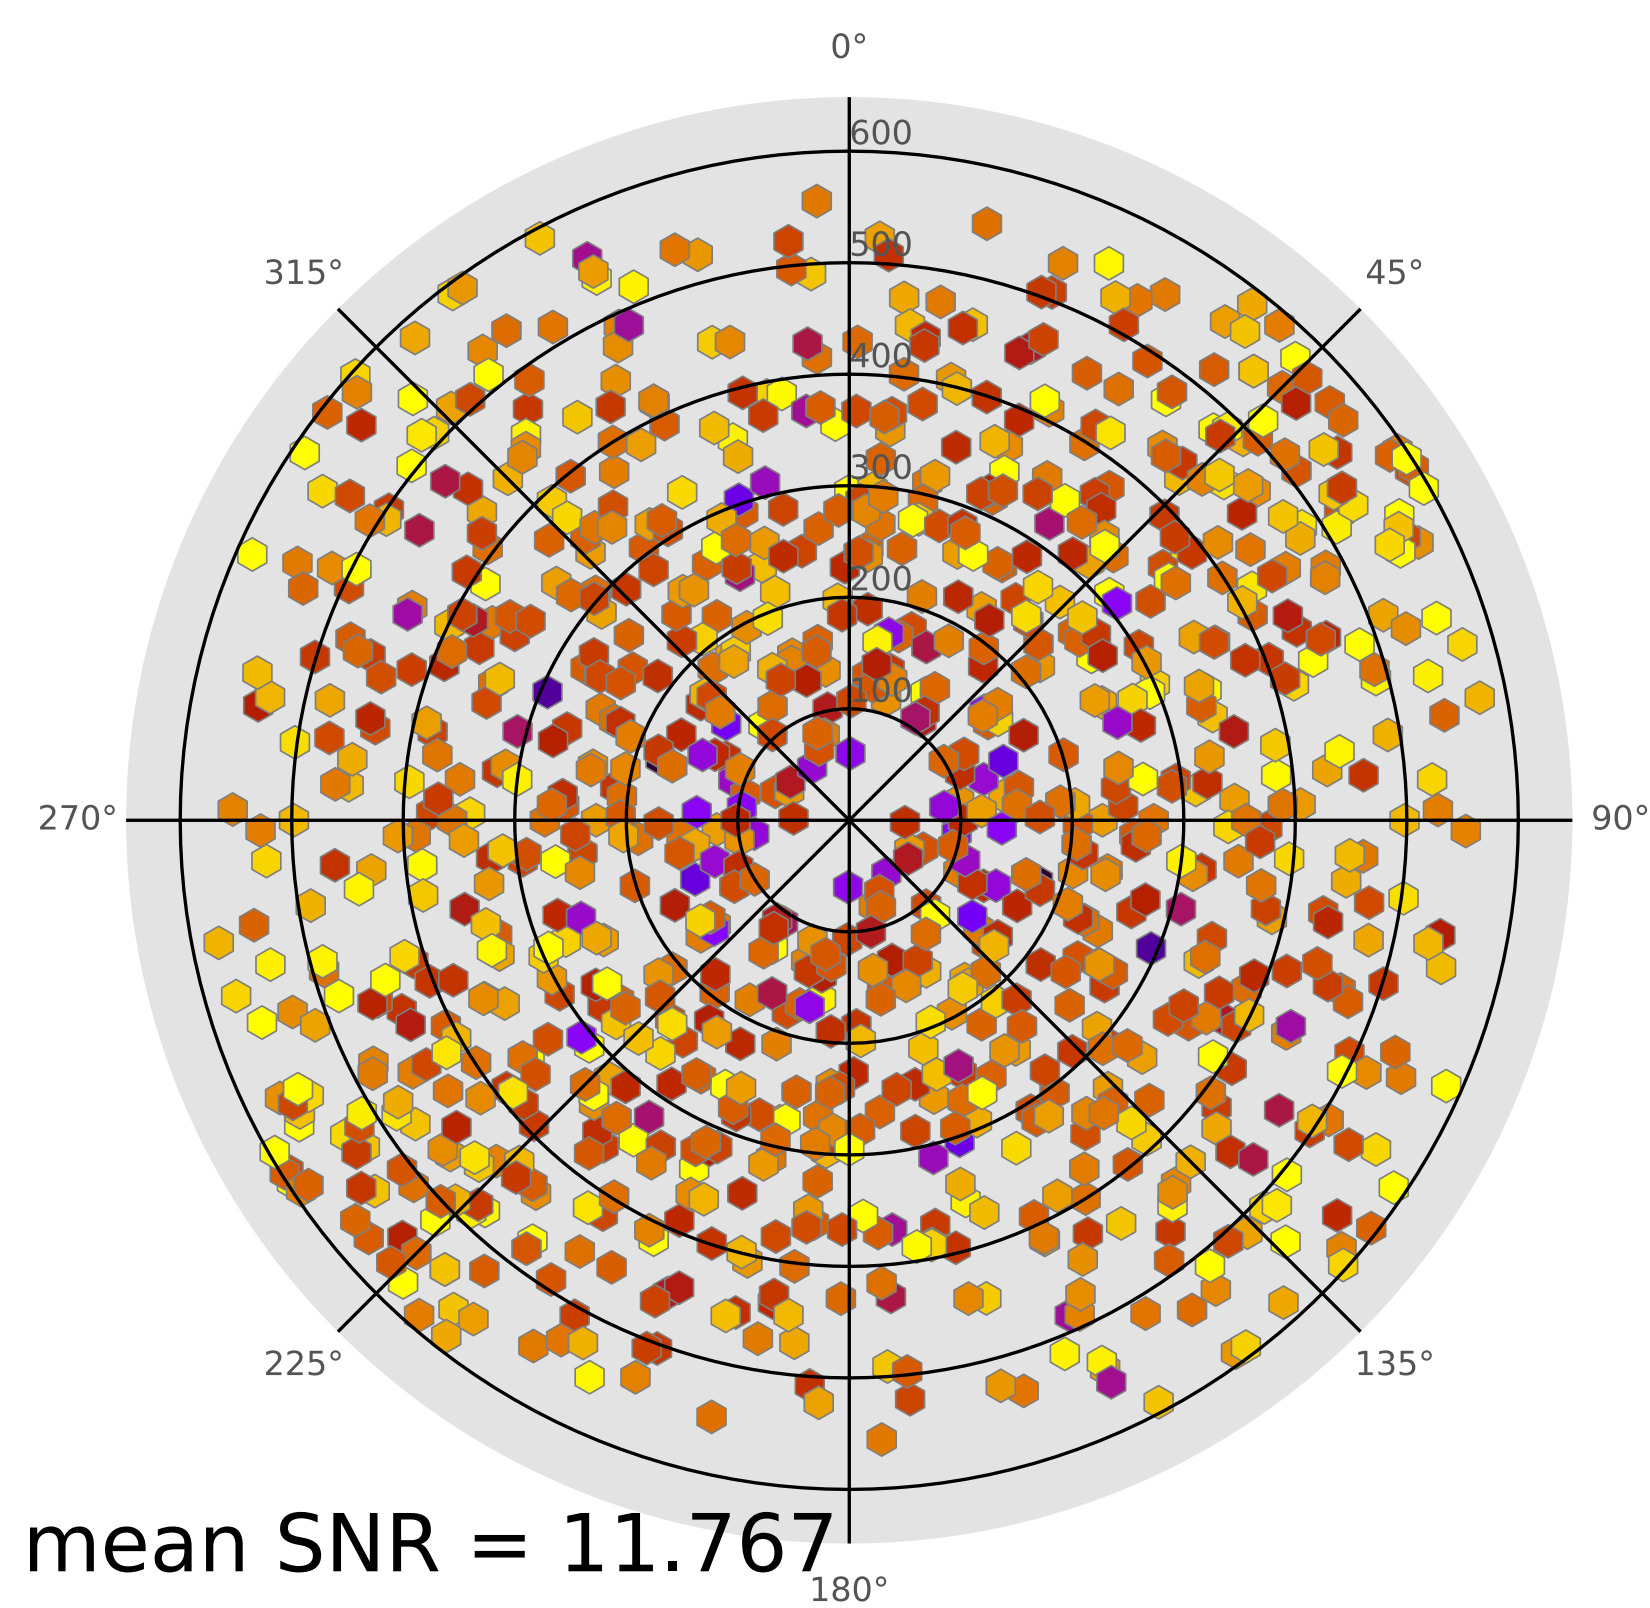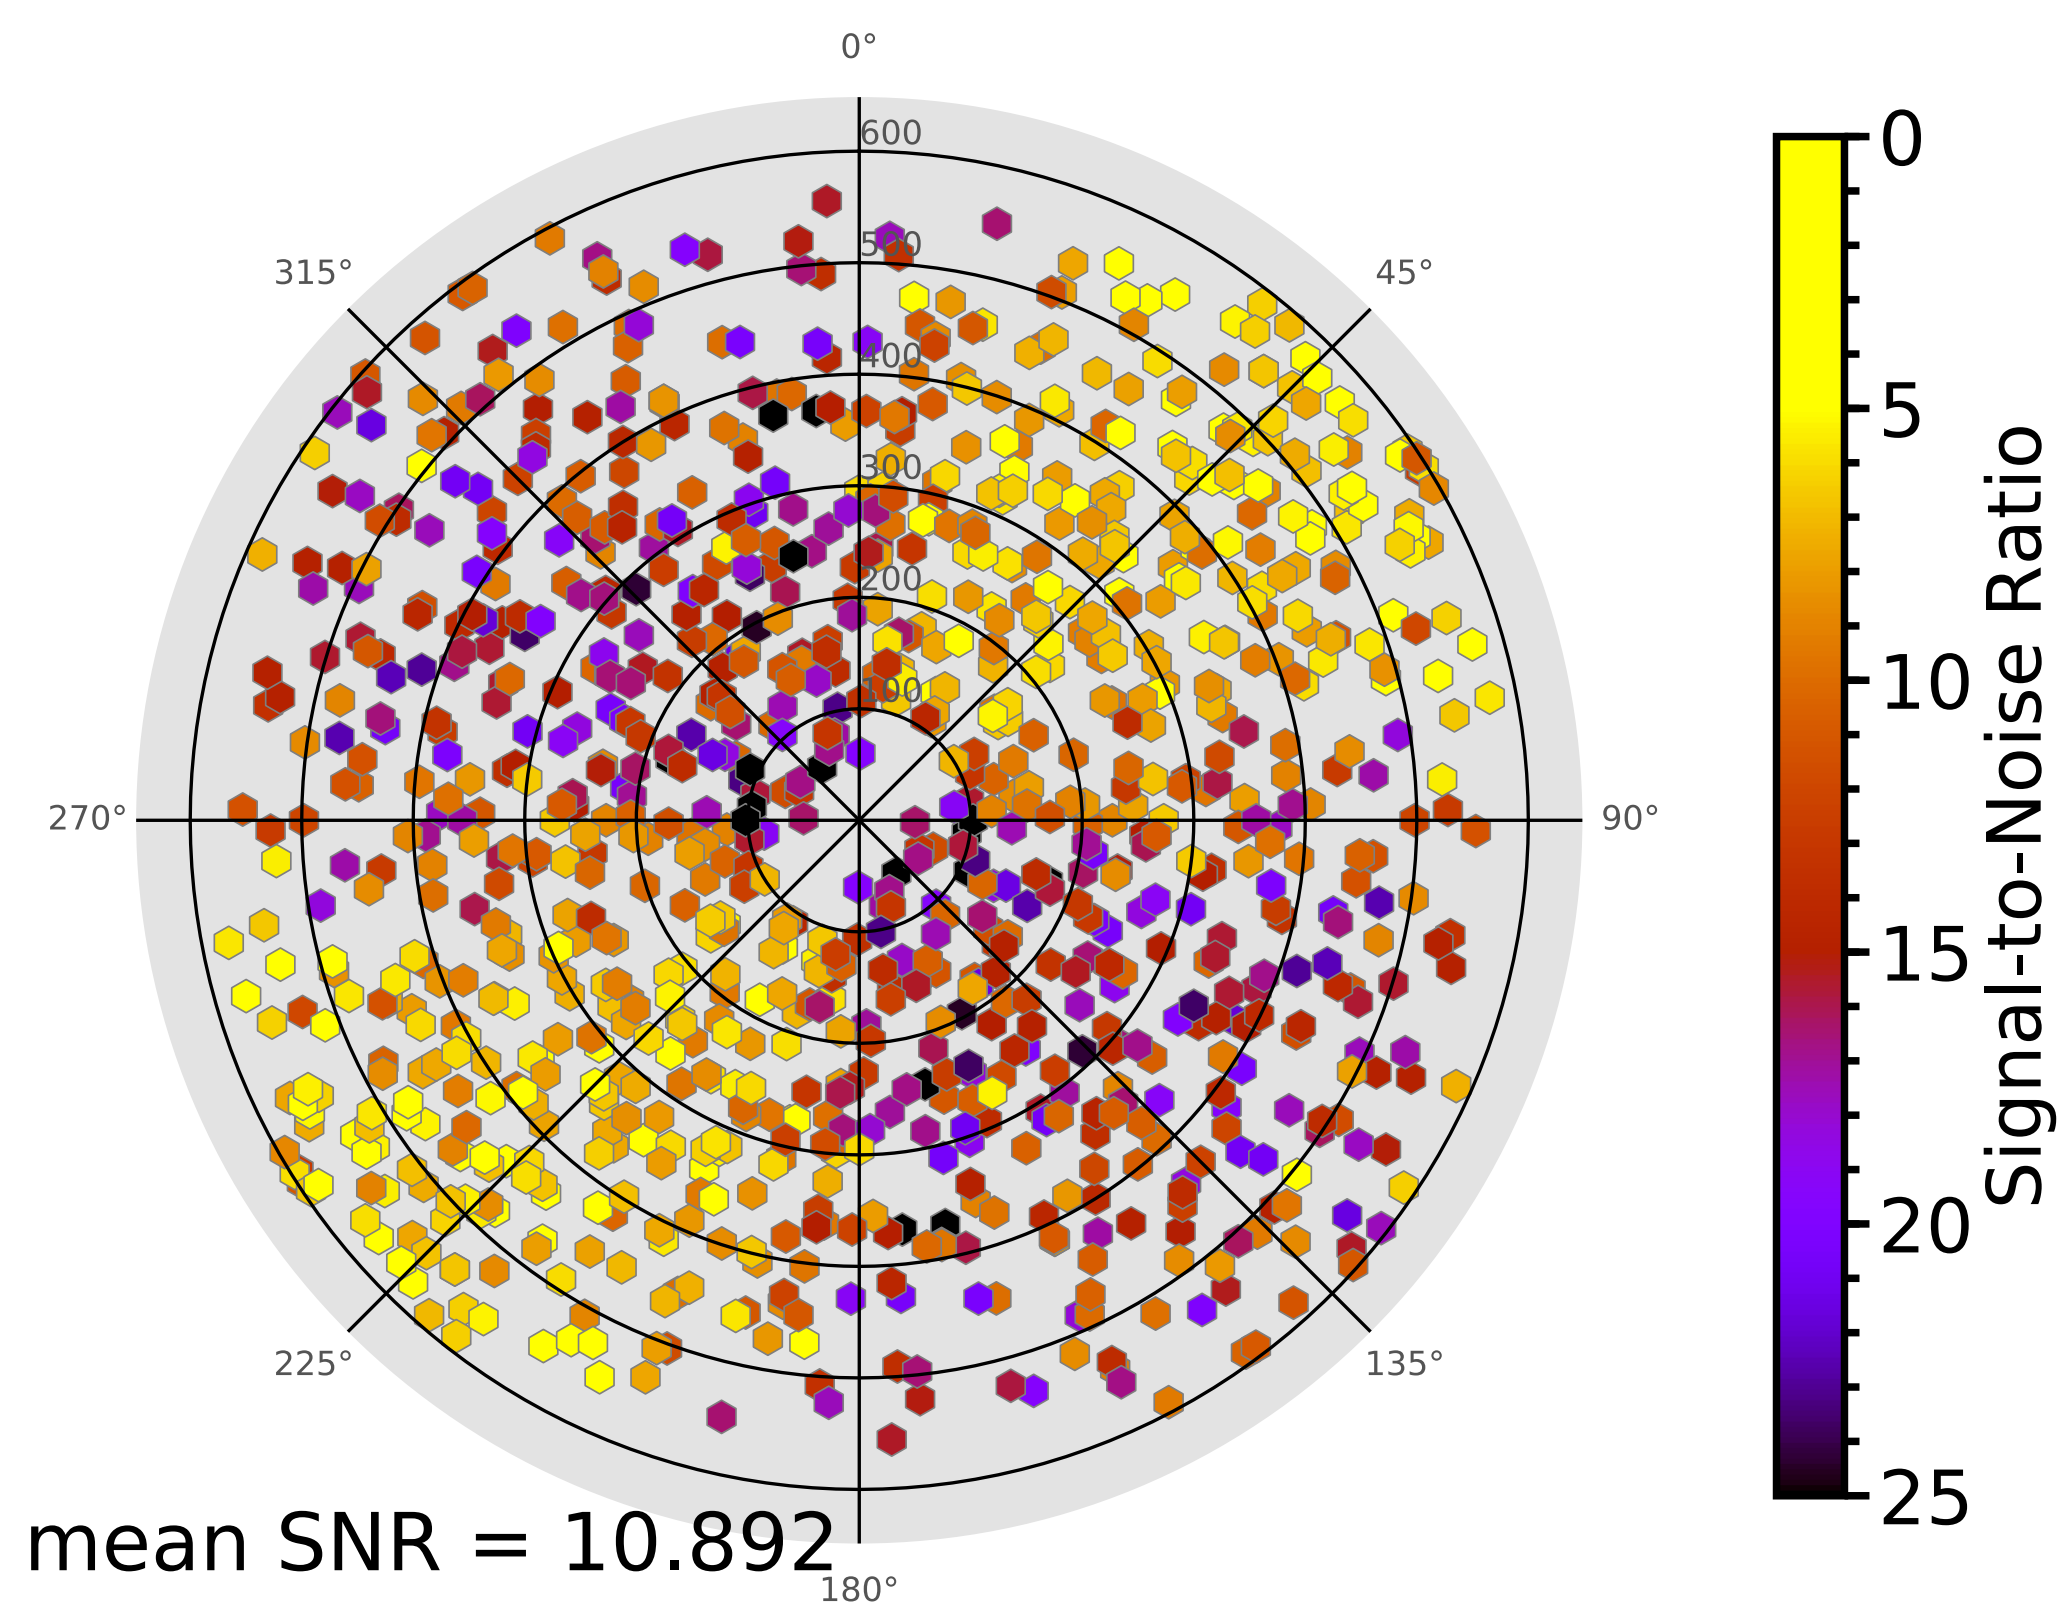

c)

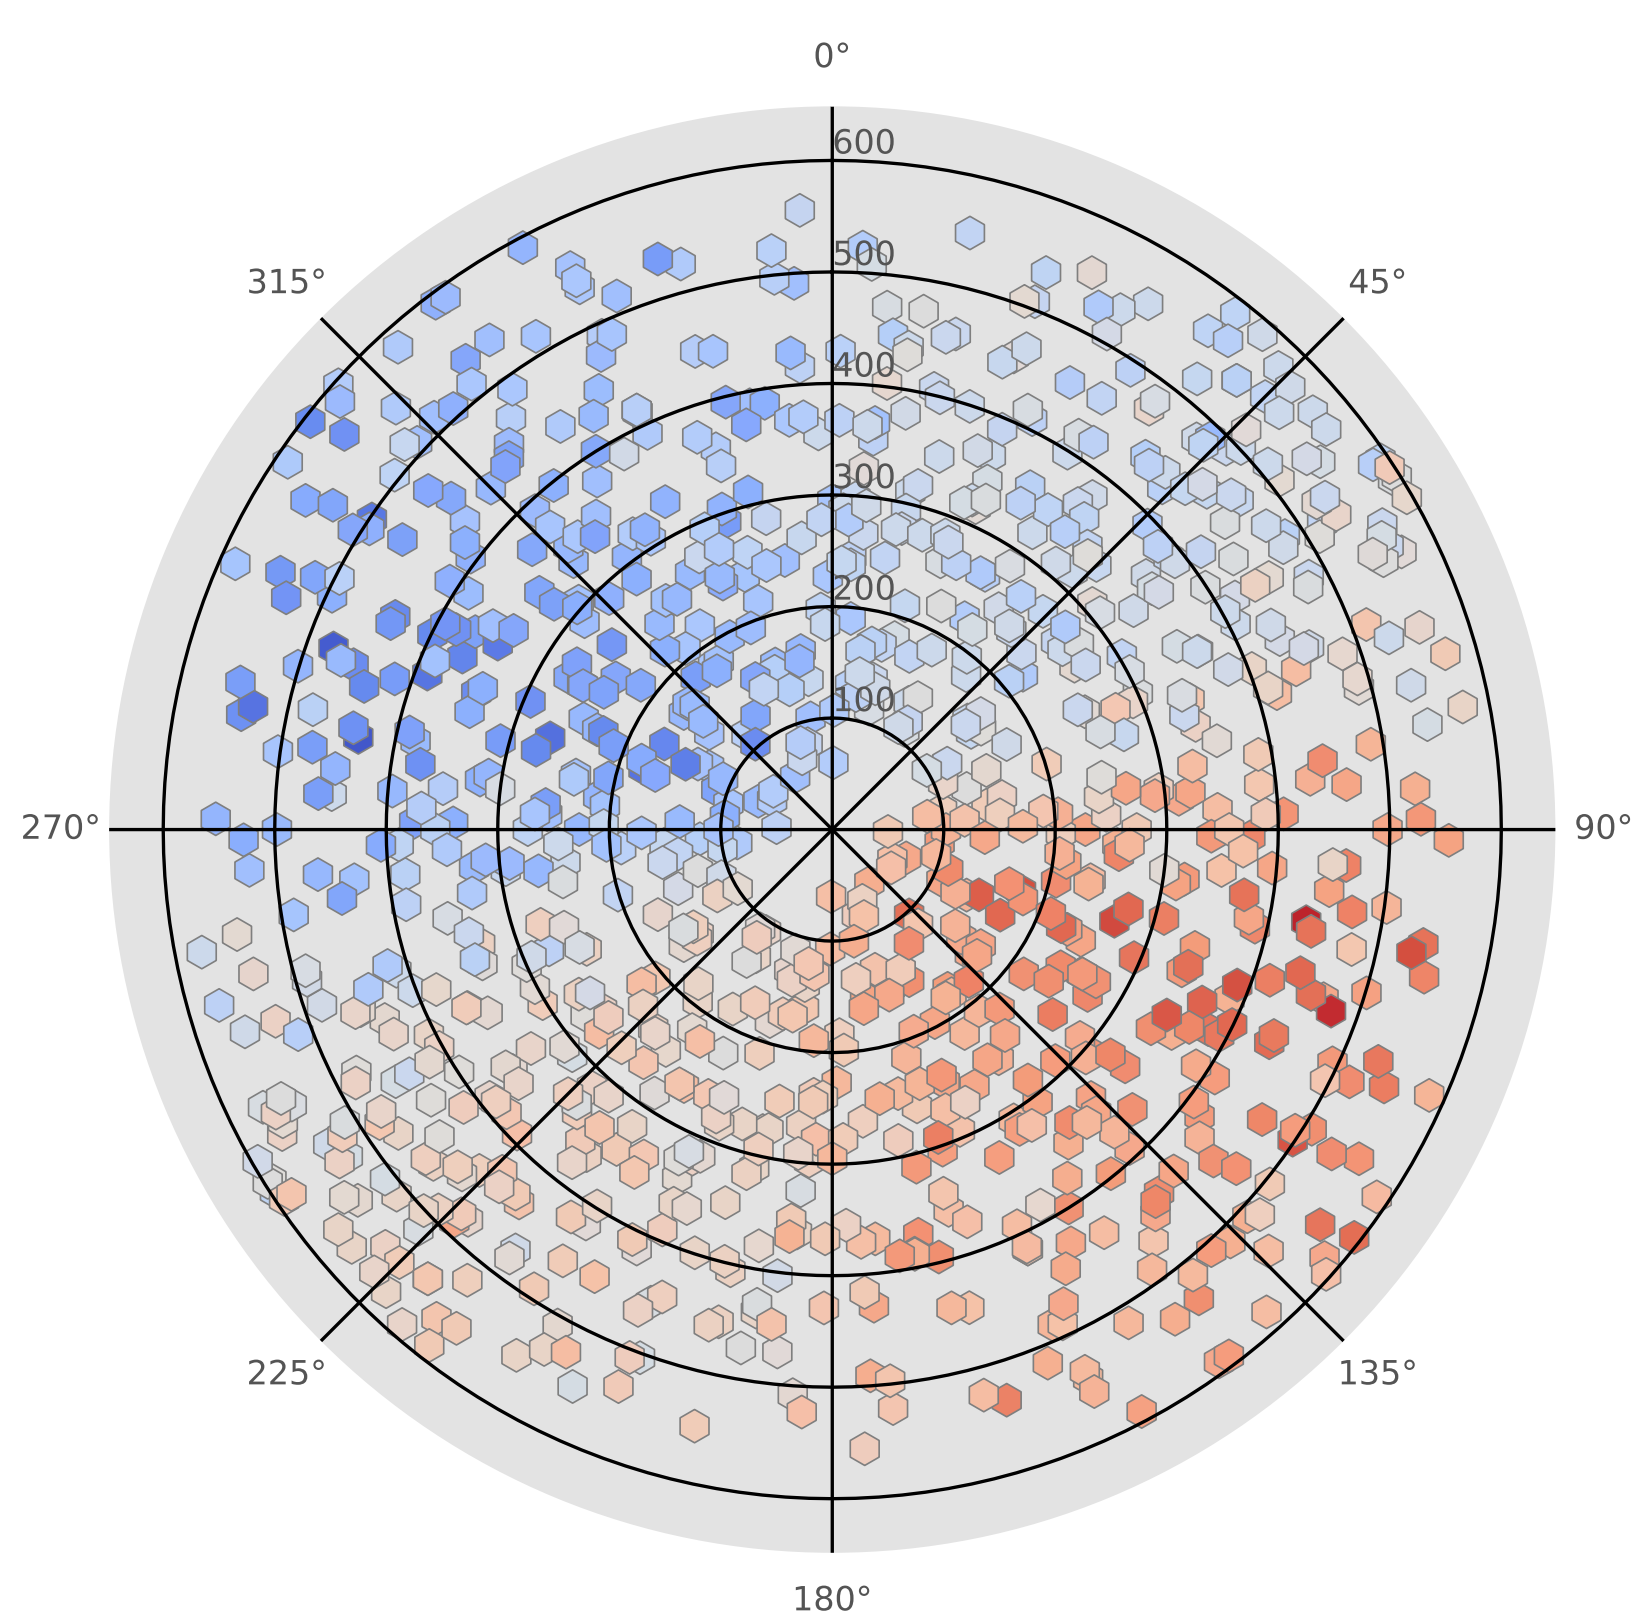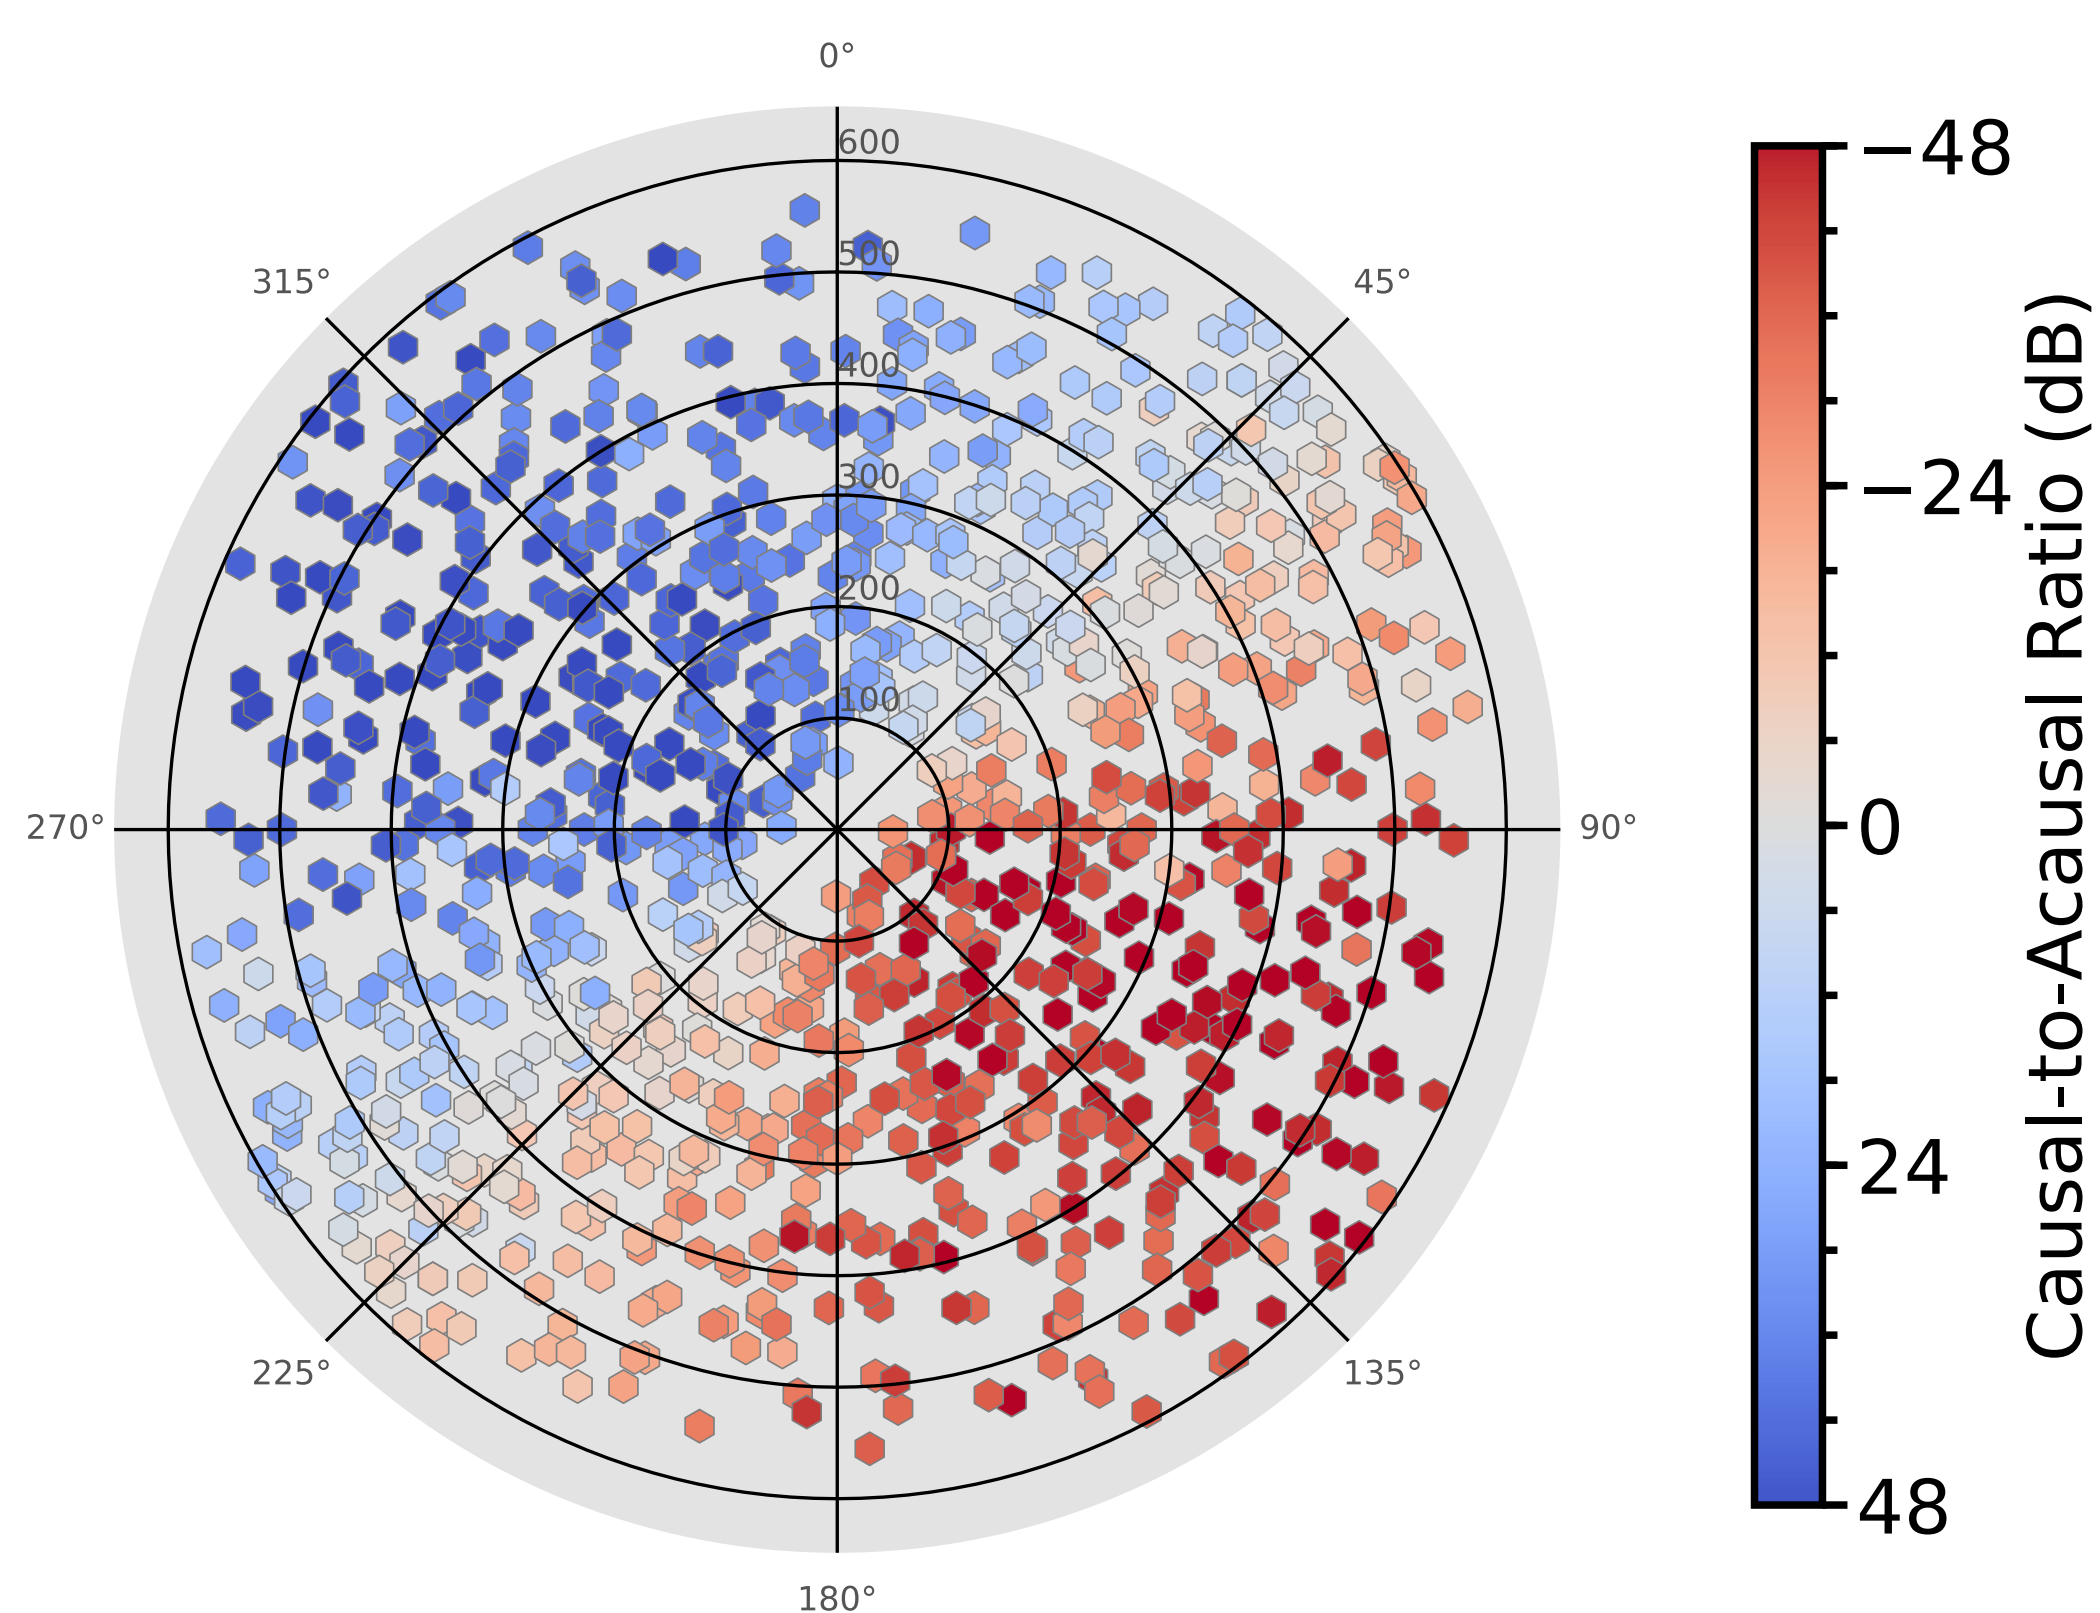

Supplement: Supplementary file 12 [file se-12-1051-2021-supplement.zip › Supplement_05_upd1.pdf]

# Band-pass filter: 17-21 s

## Summer

## Winter

a)

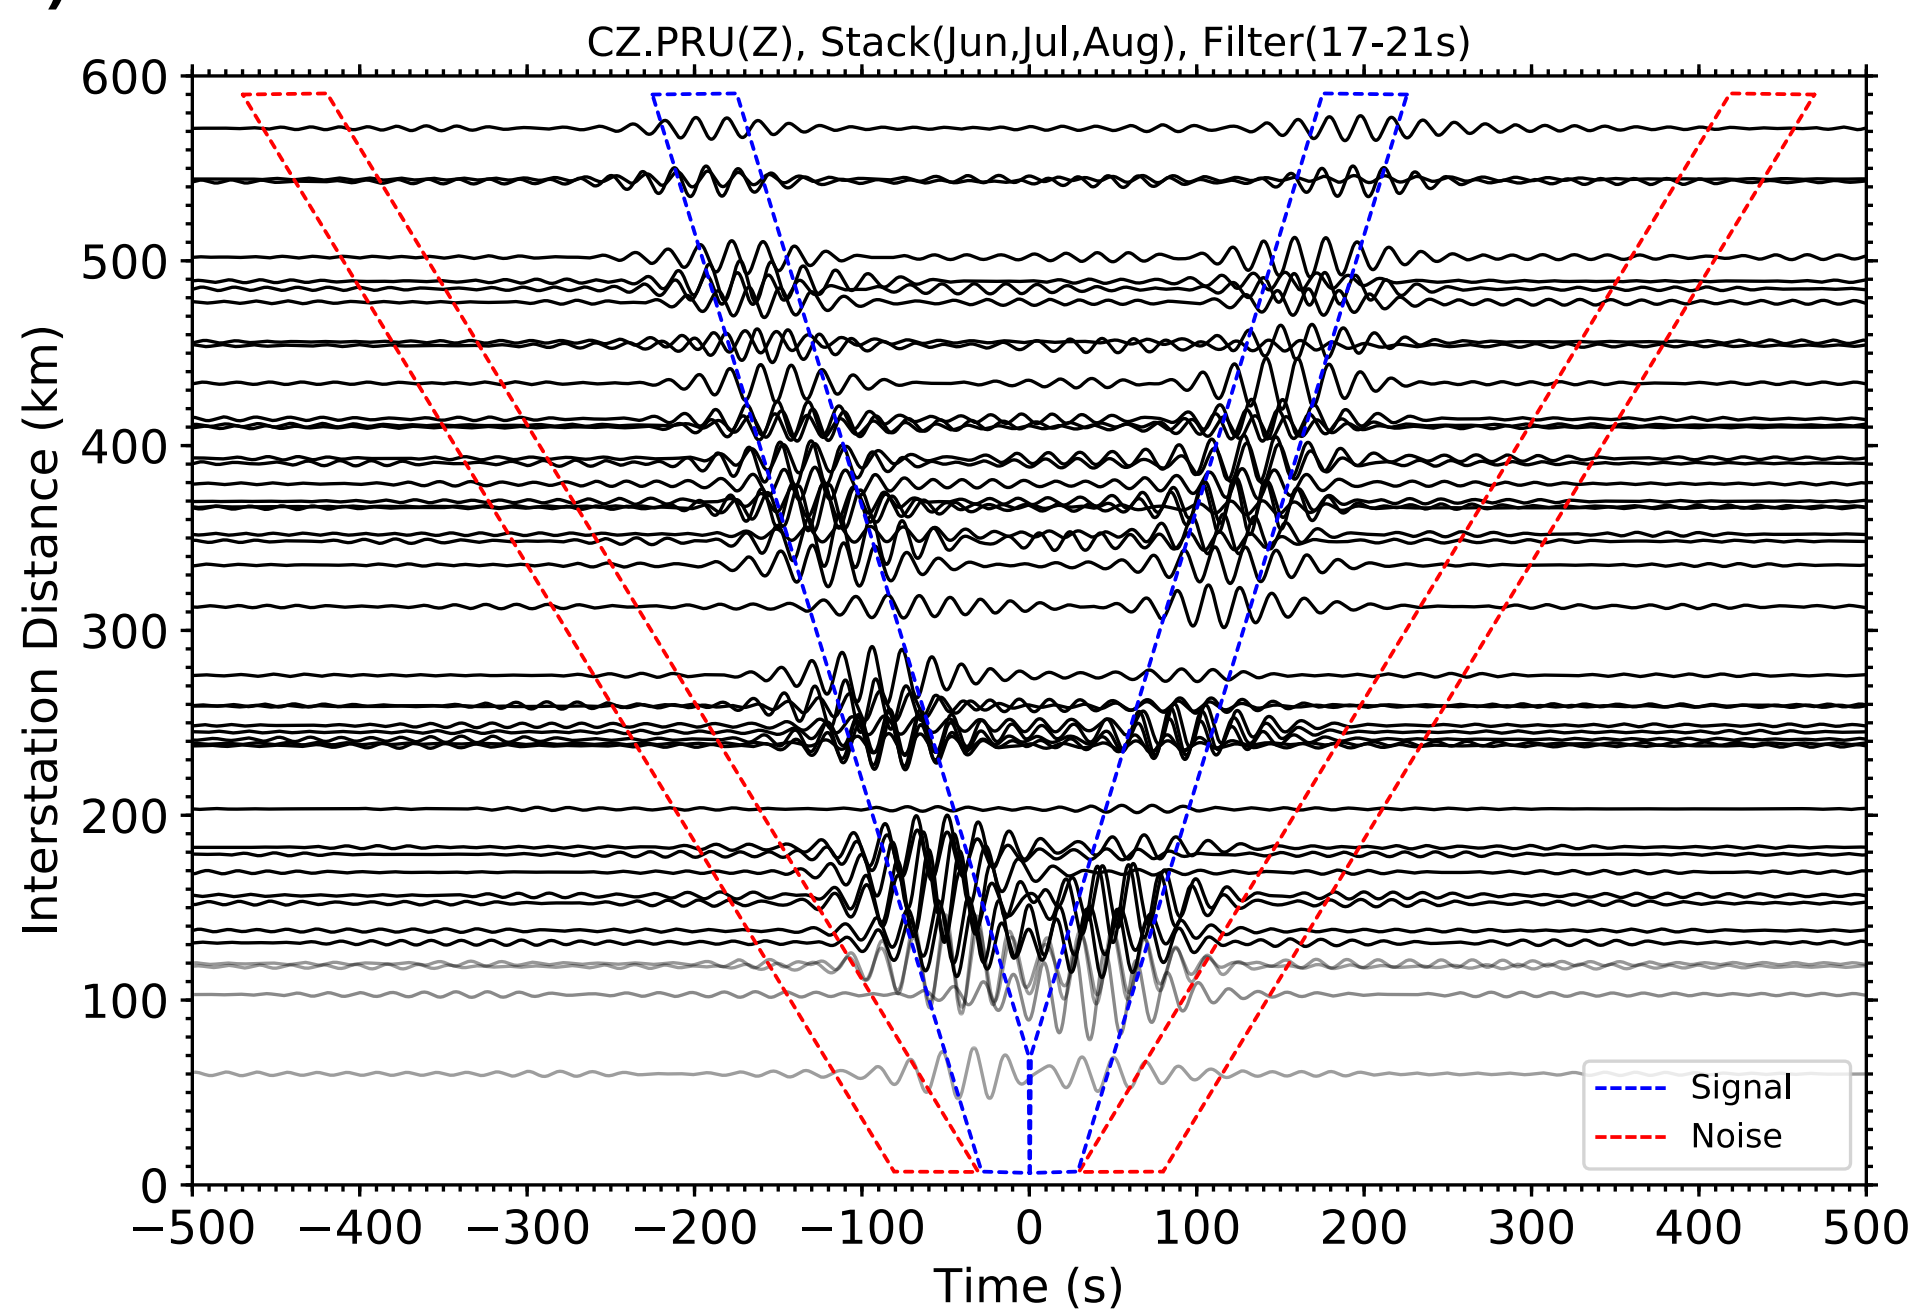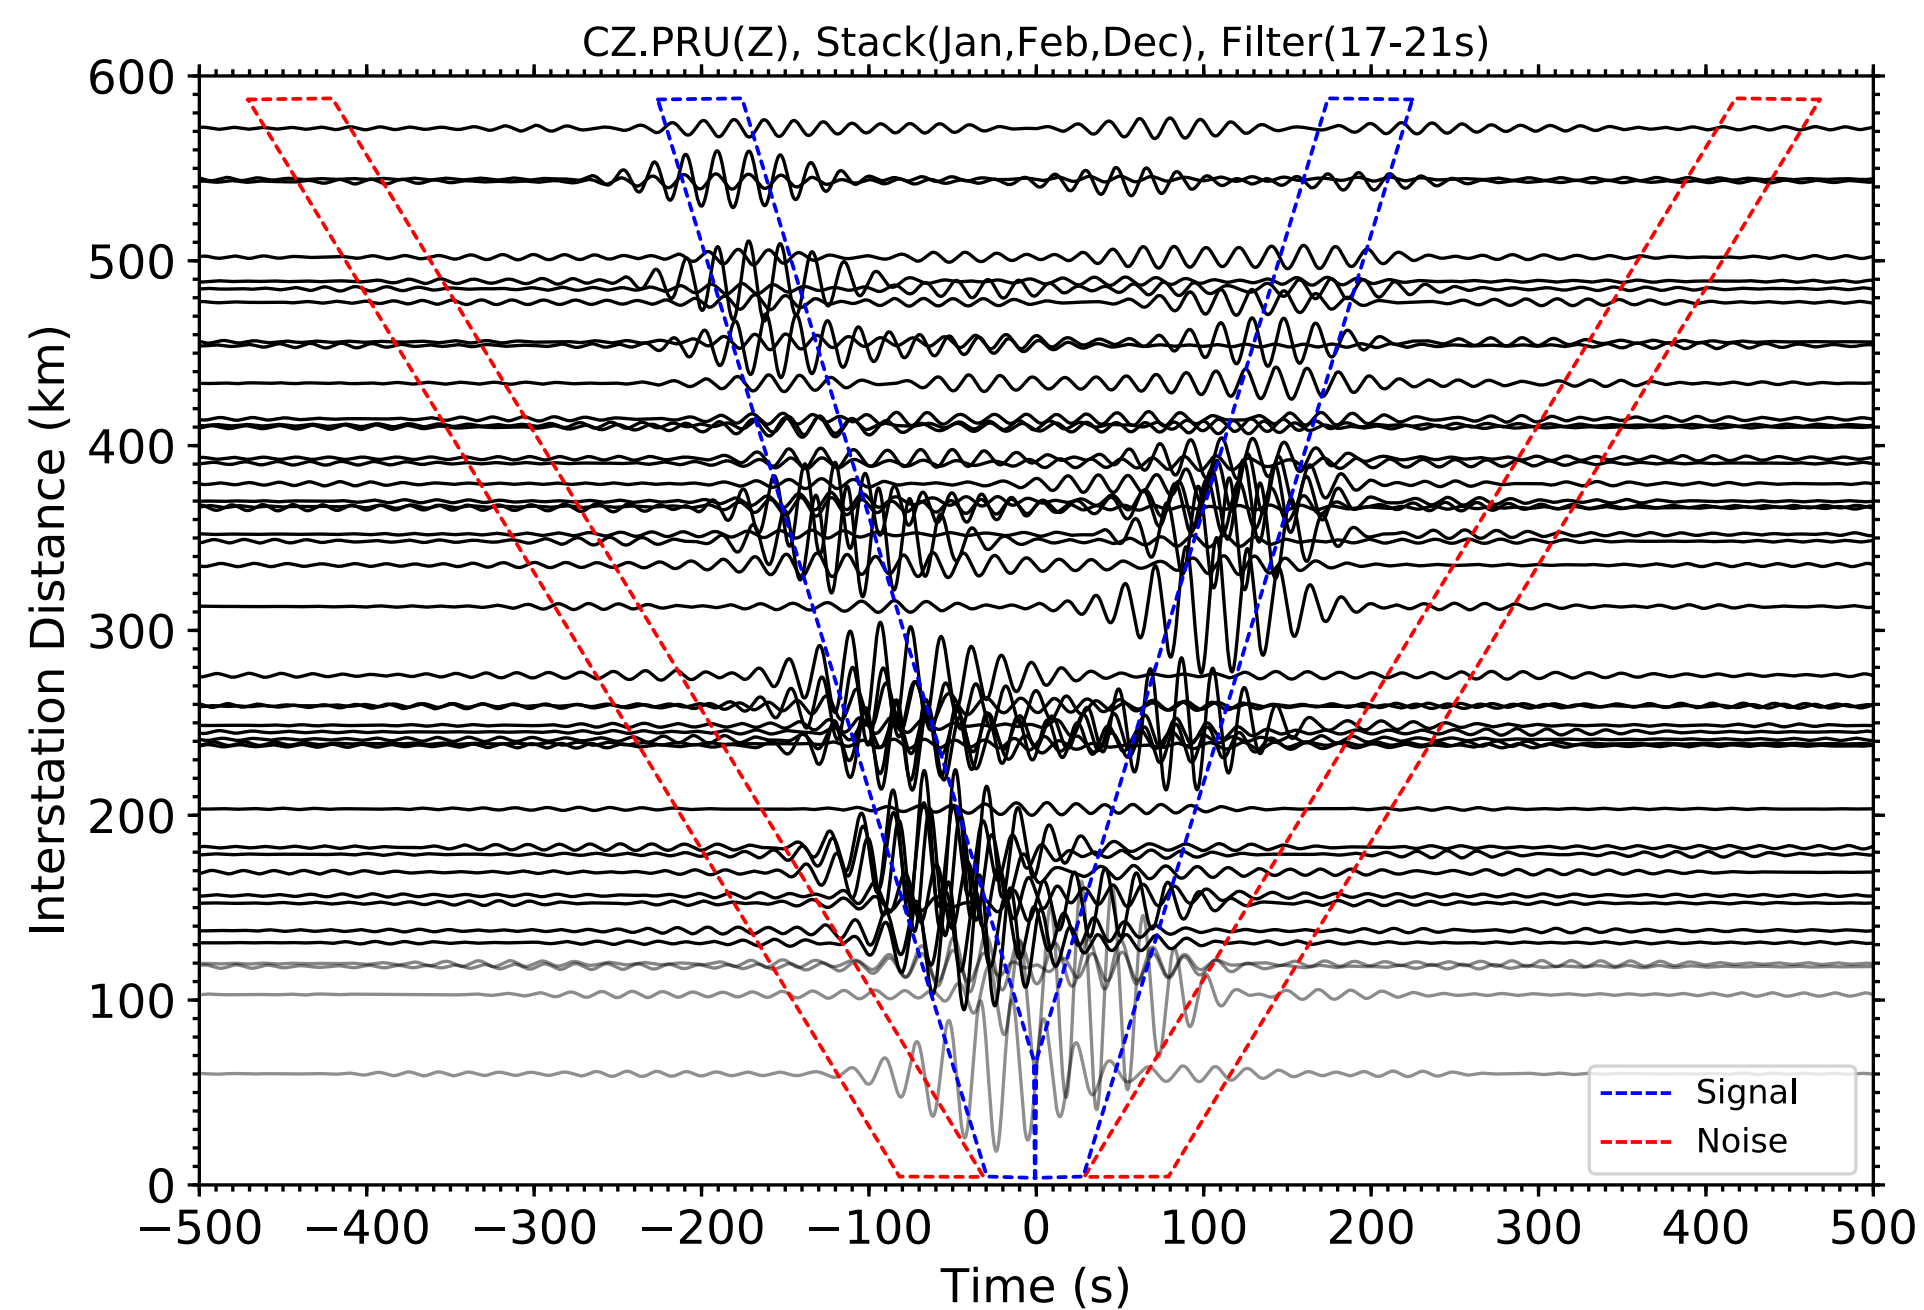

b)

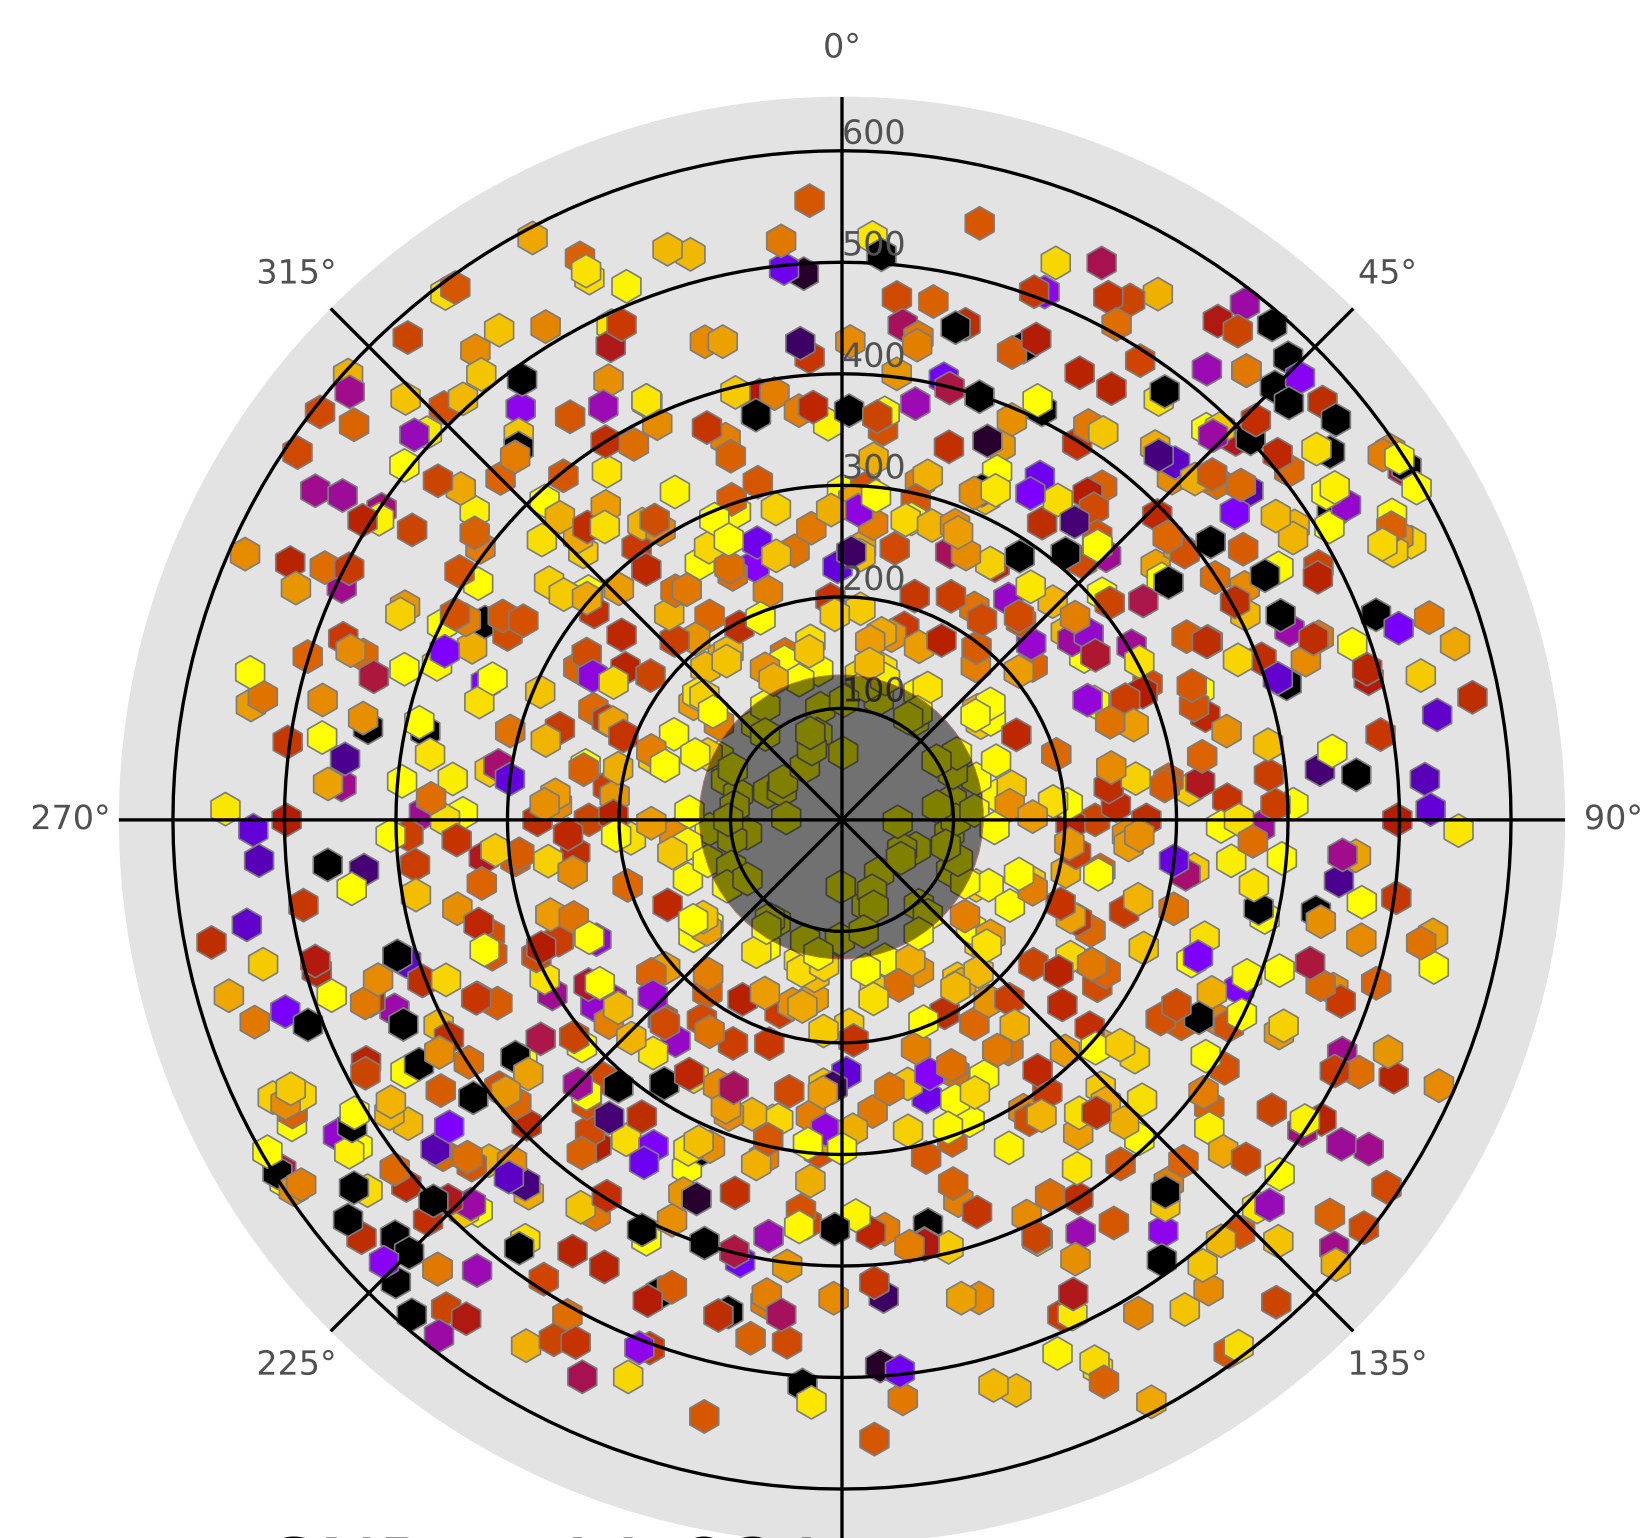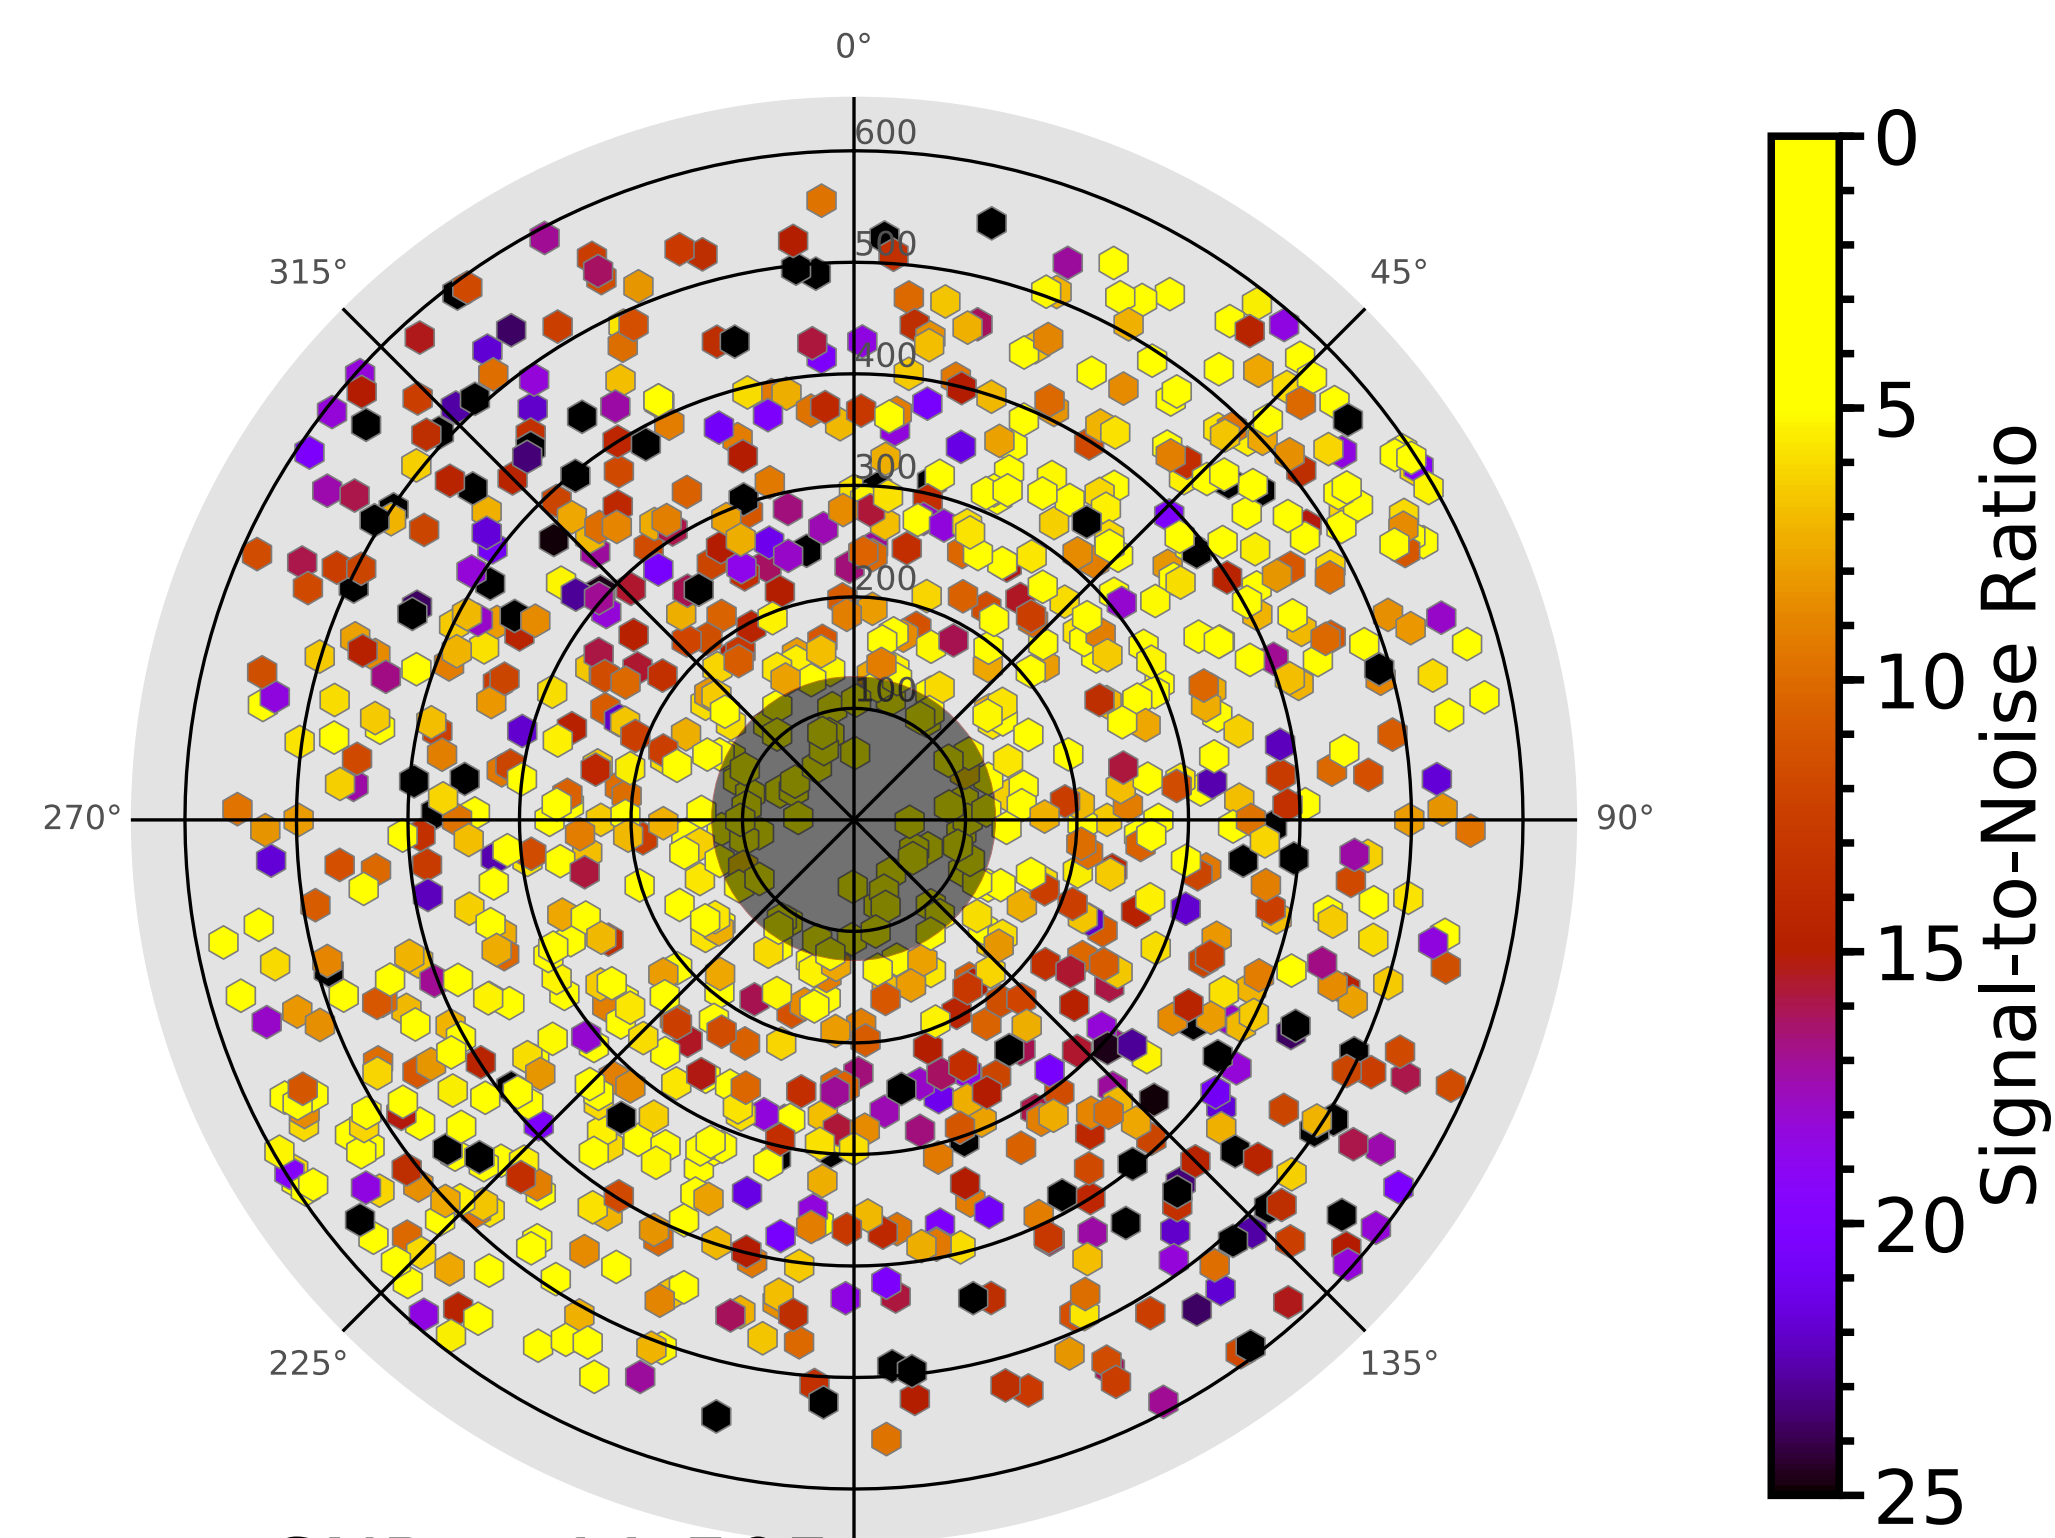

c)

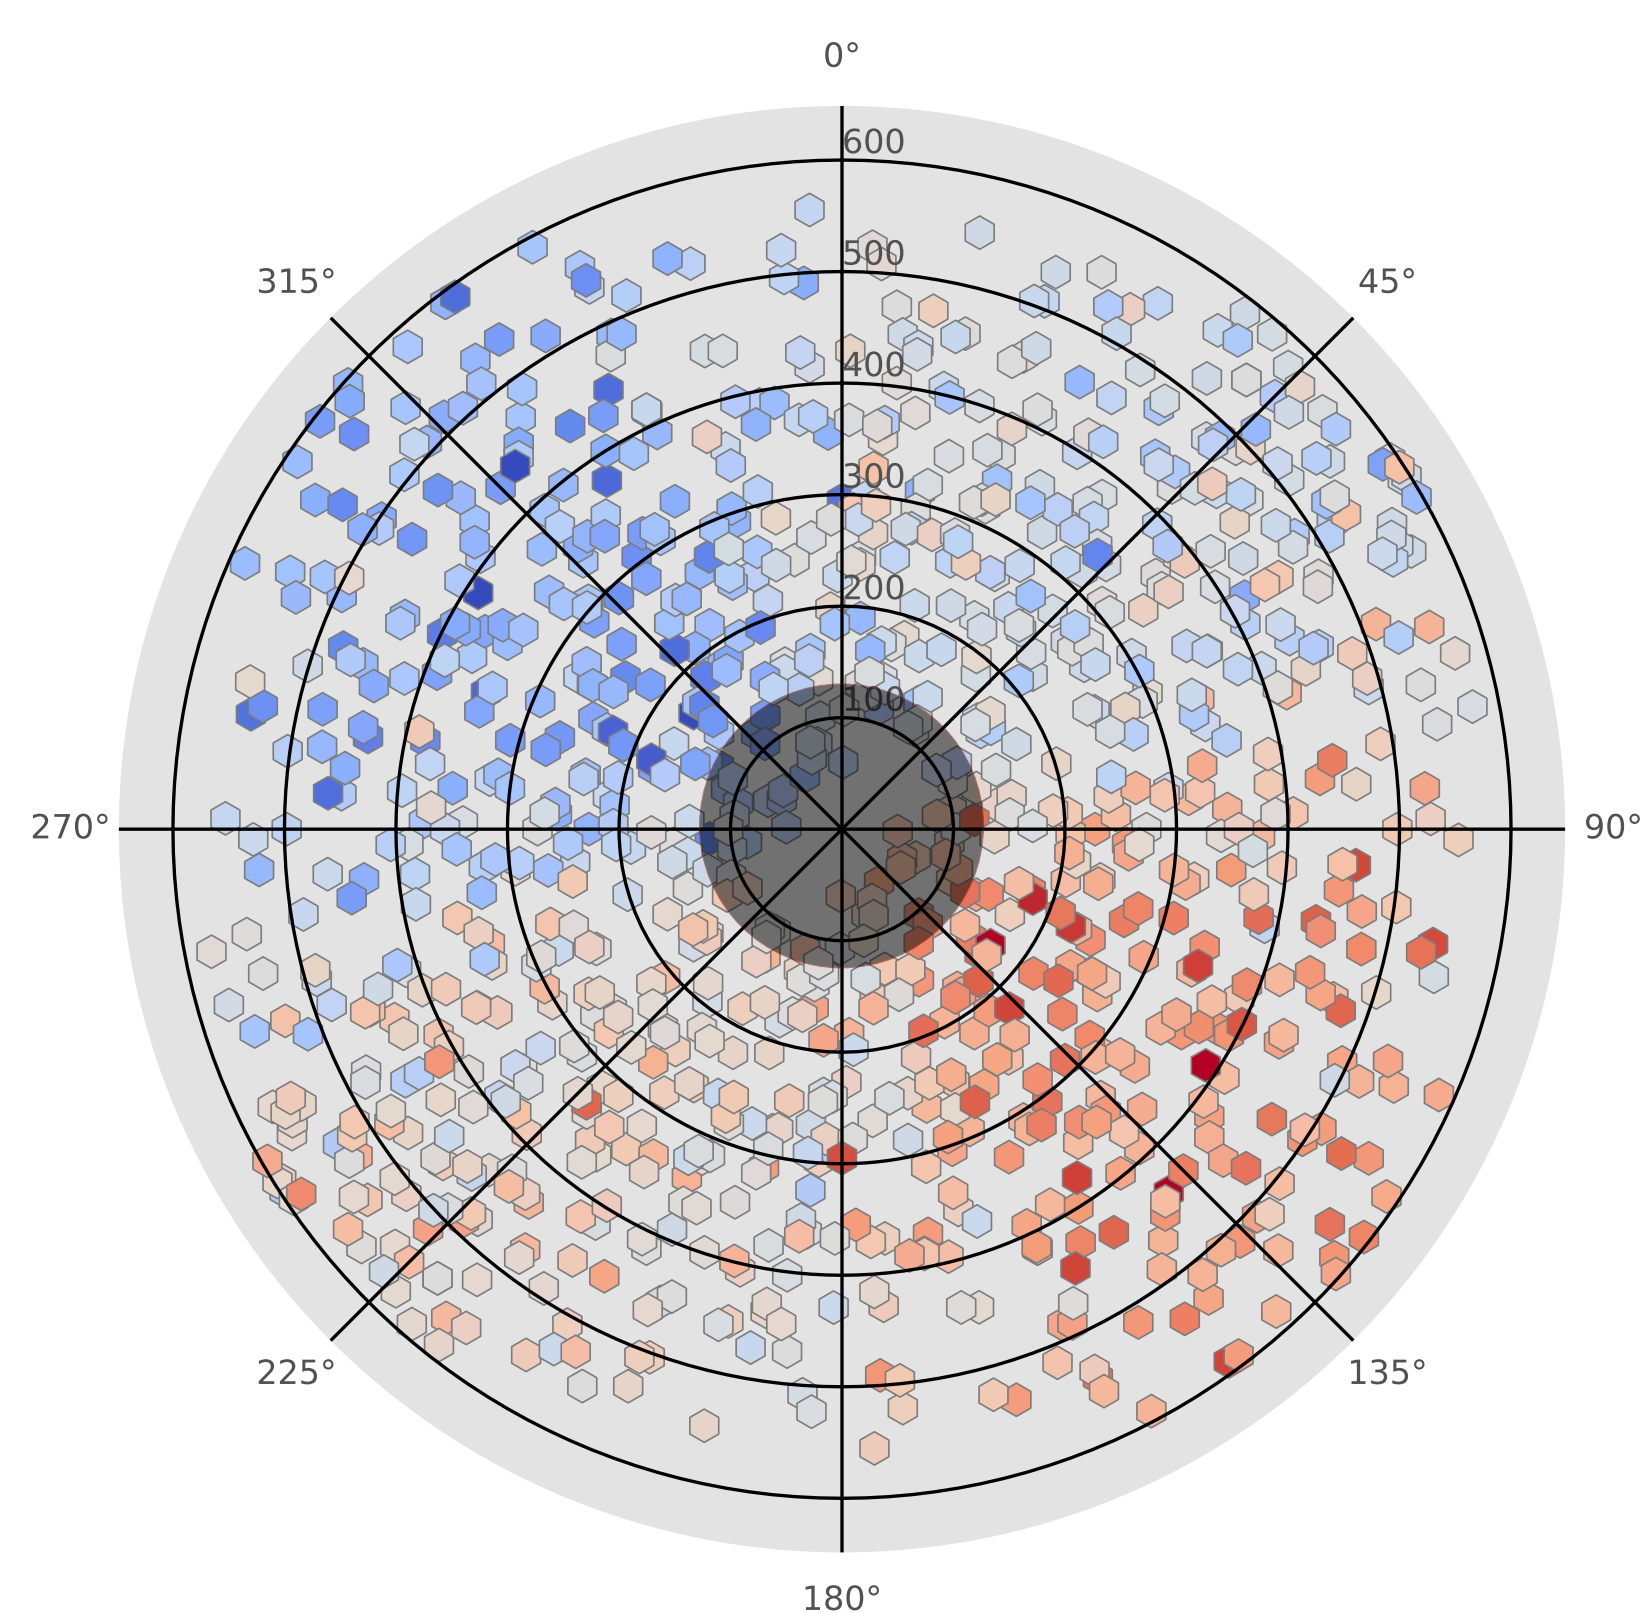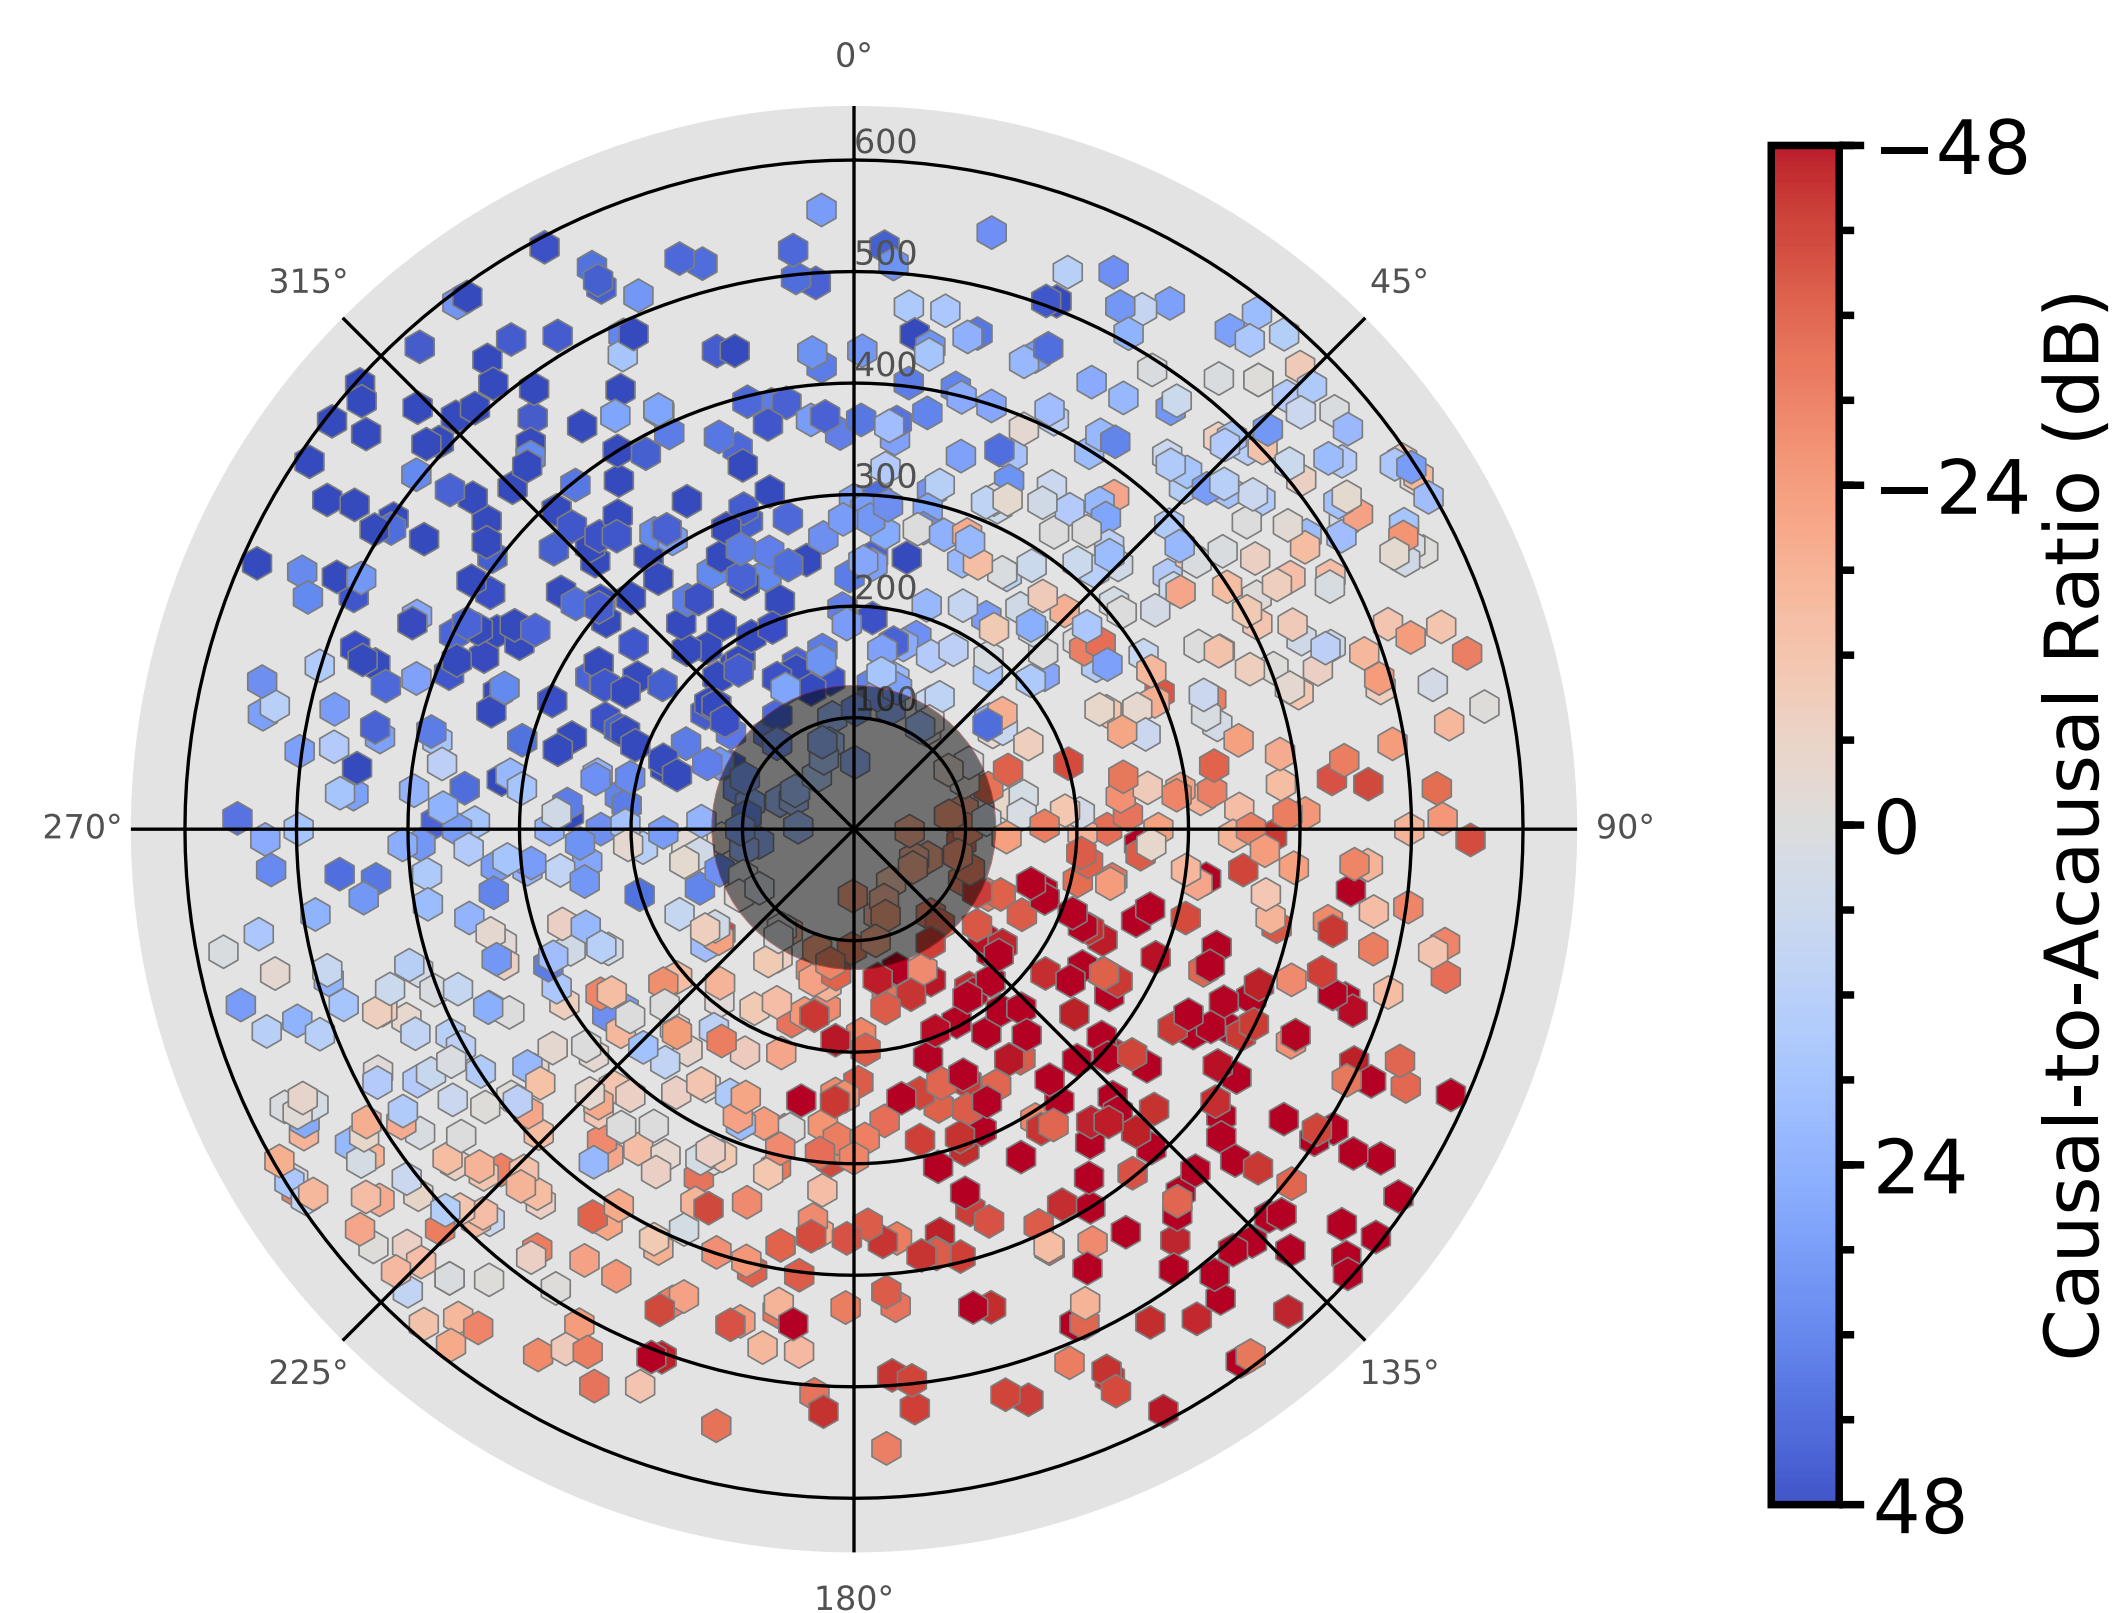

Supplement: Supplementary file 12 [file se-12-1051-2021-supplement.zip › Supplement_02_upd1.pdf]

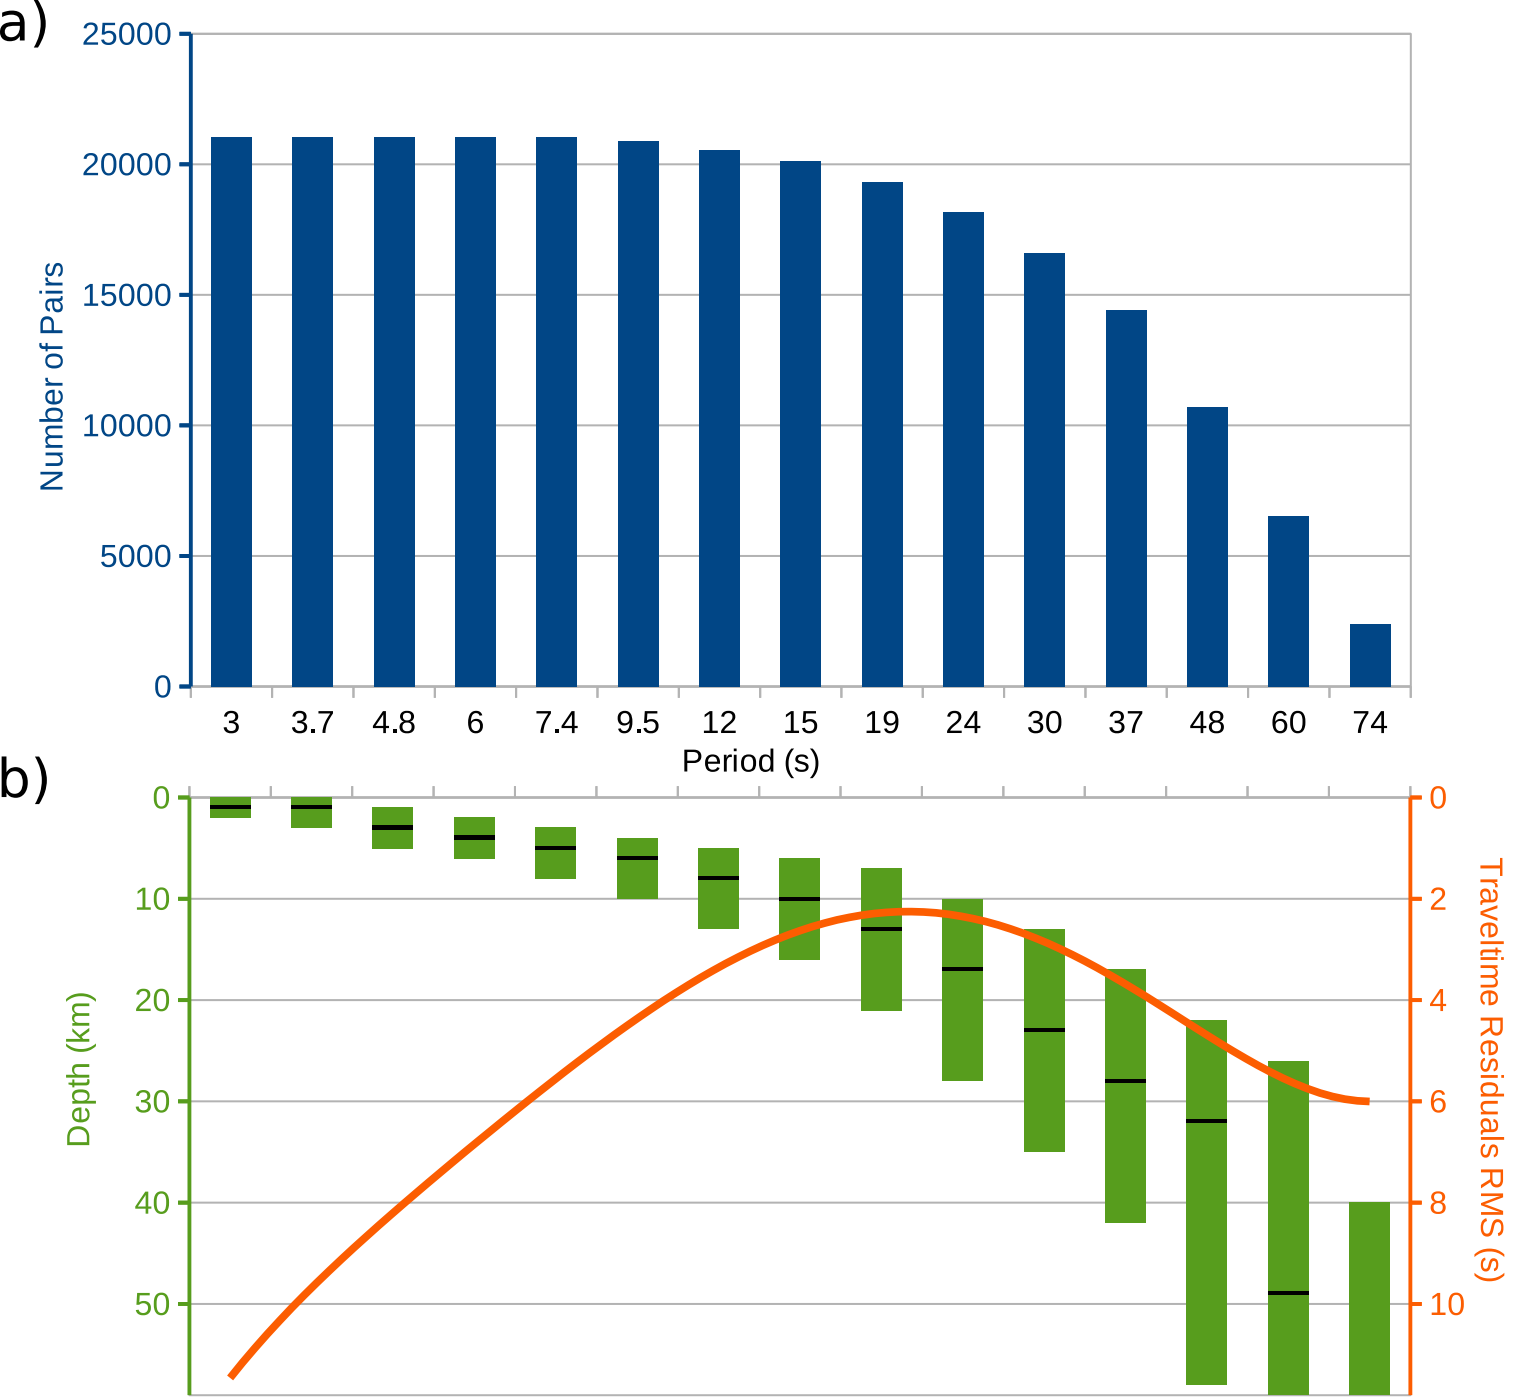

Supplement: Supplementary file 12 [file se-12-1051-2021-supplement.zip › Supplement_25.pdf]

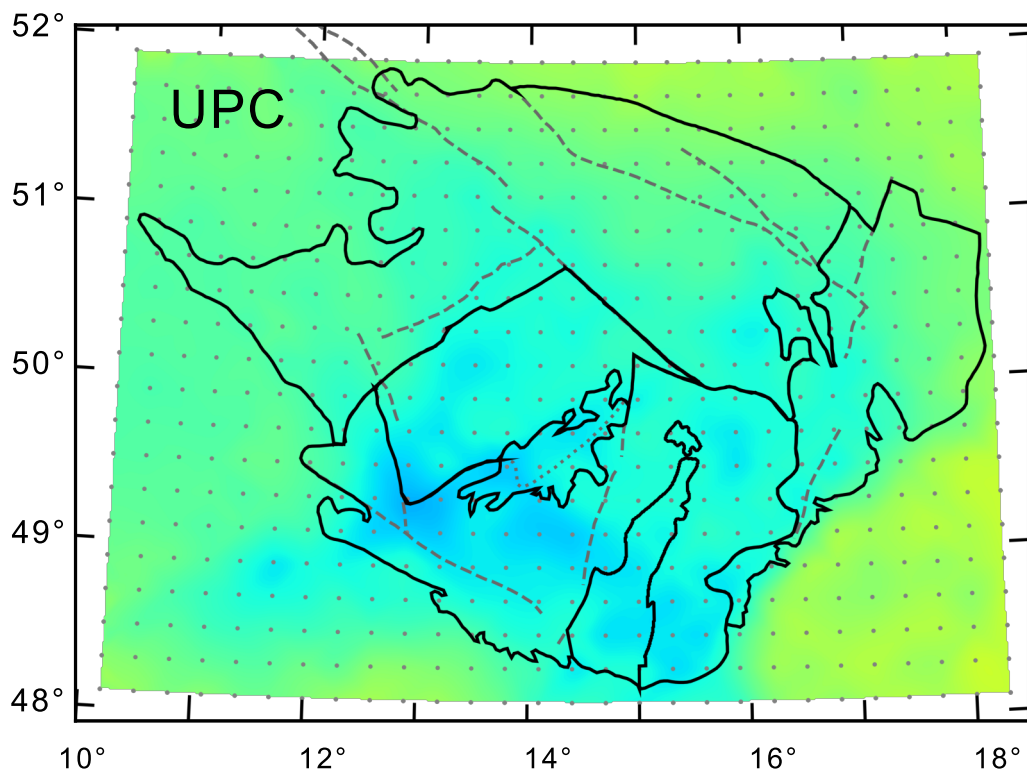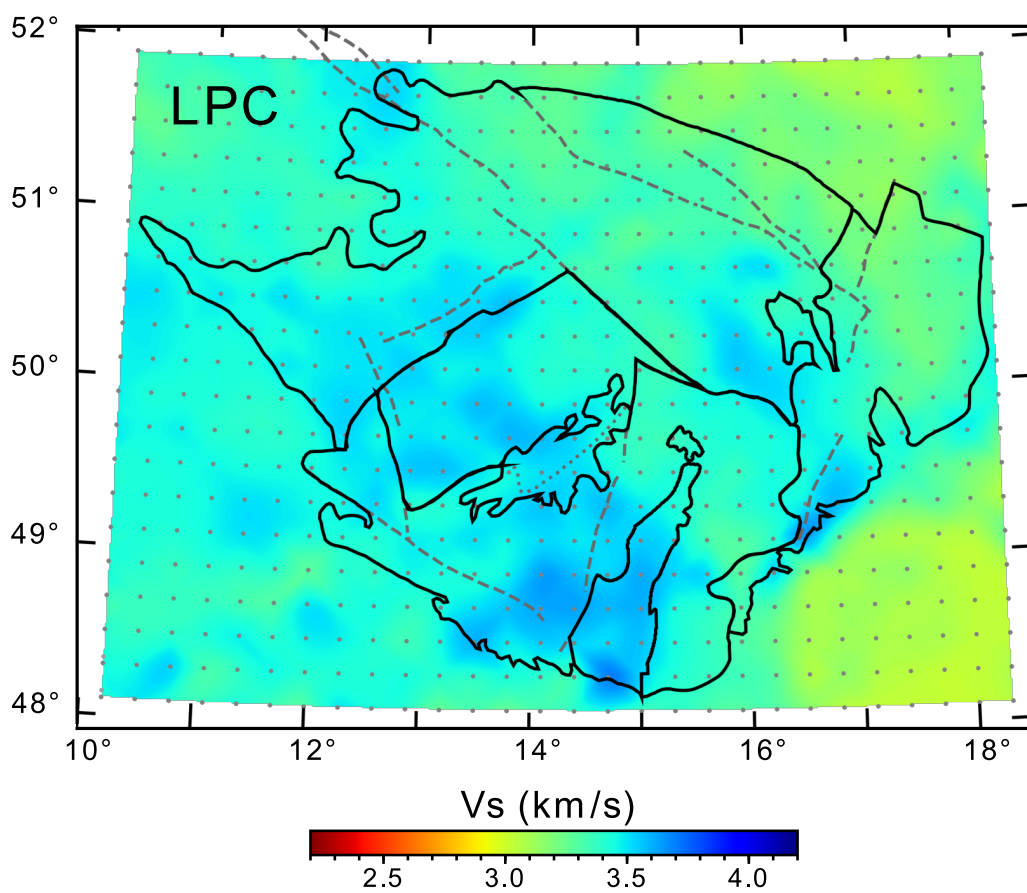

Supplement: Supplementary file 12 [file se-12-1051-2021-supplement.zip › Supplement_14.pdf]

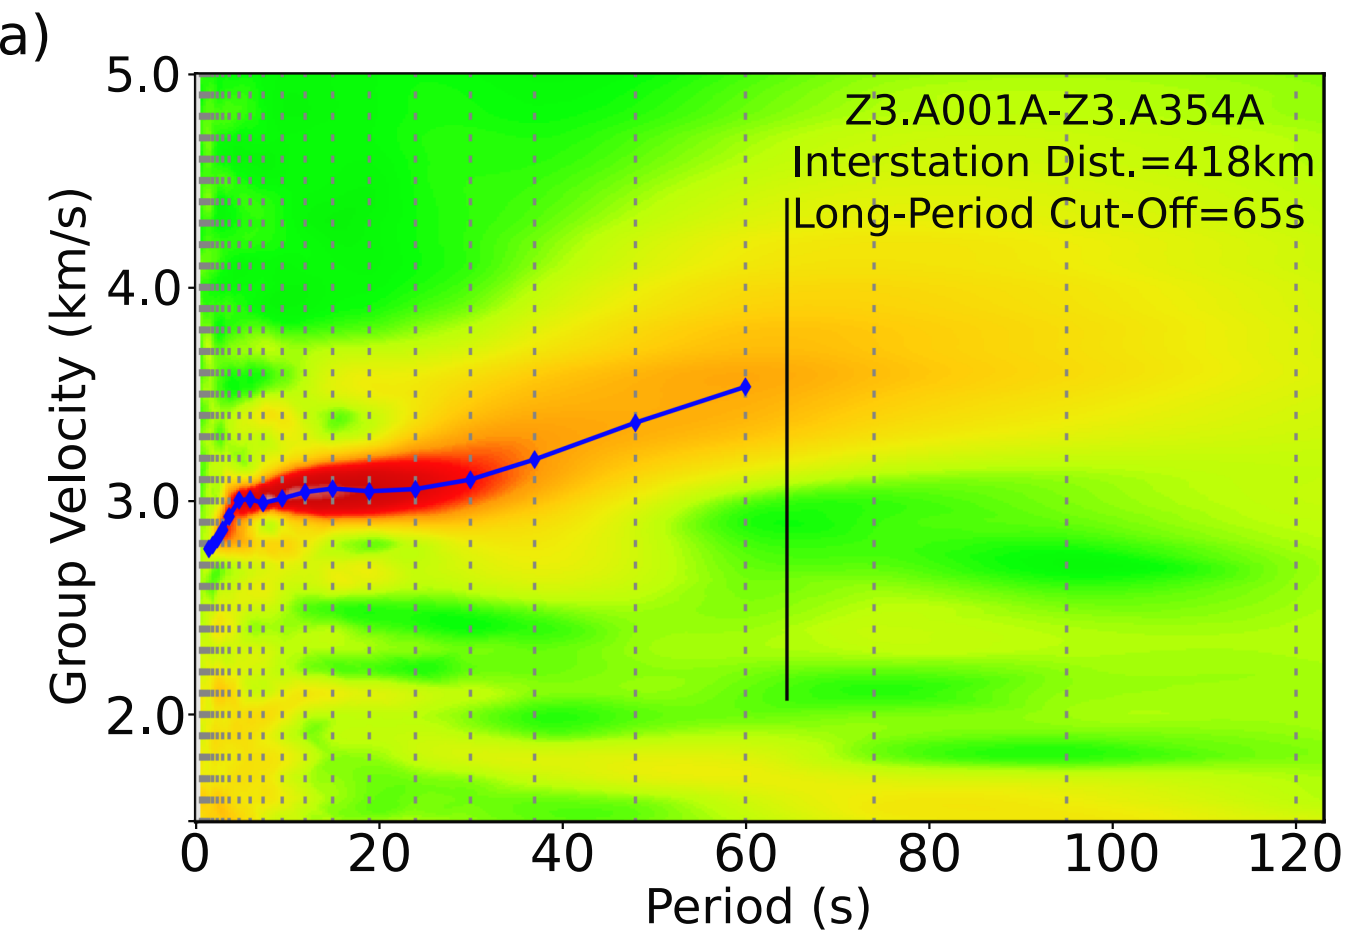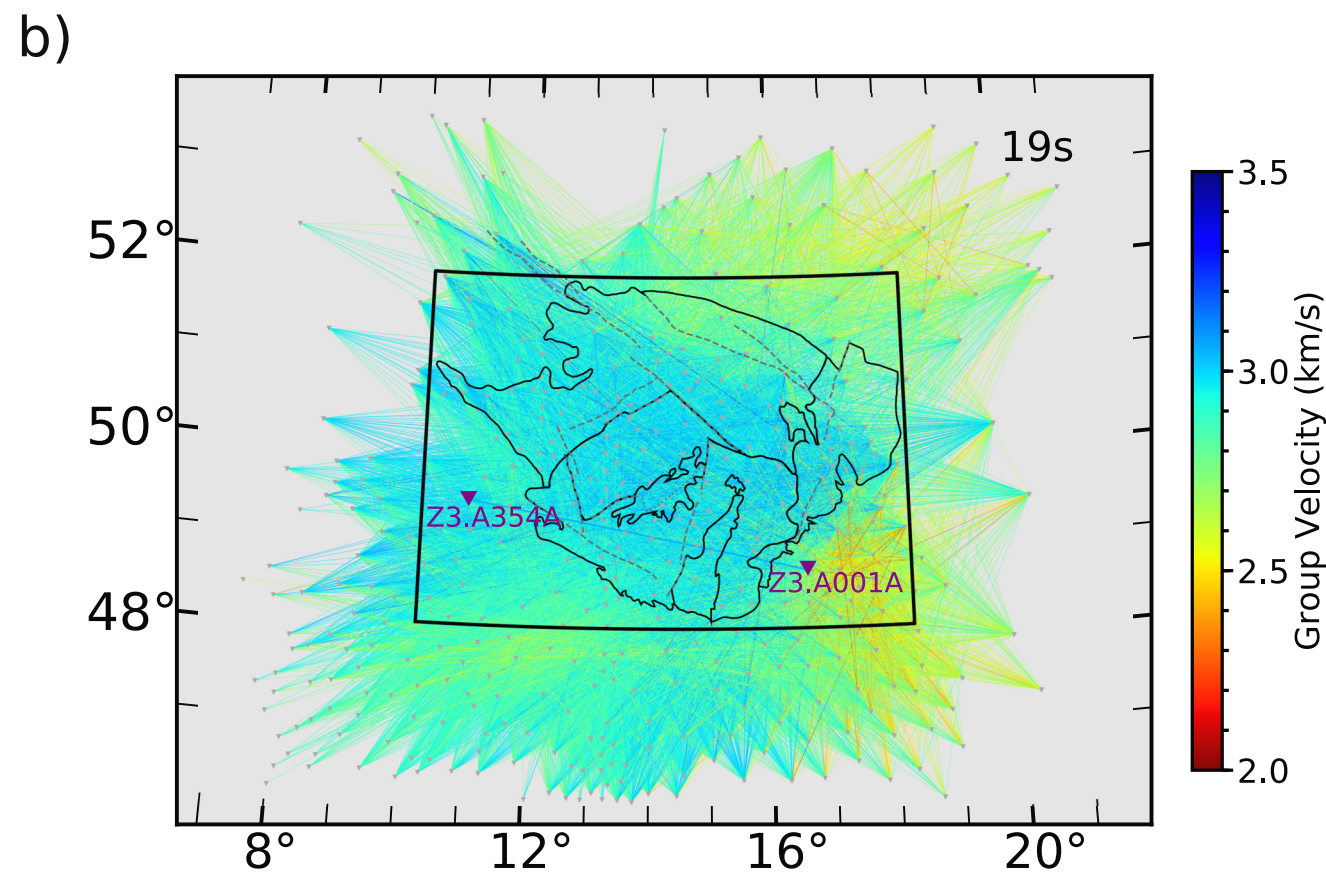

Supplement: Supplementary file 12 [file se-12-1051-2021-supplement.zip › Supplement_06.pdf]

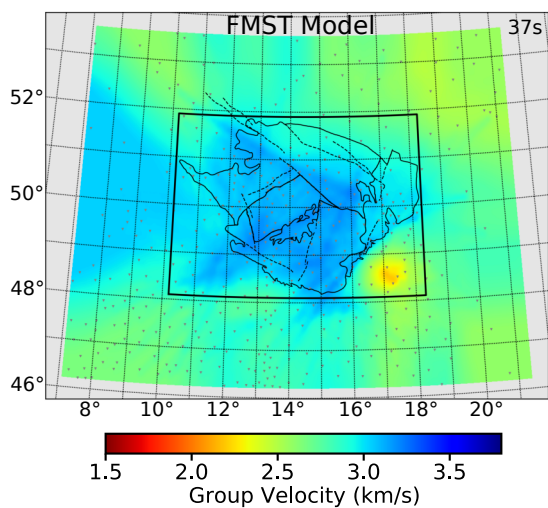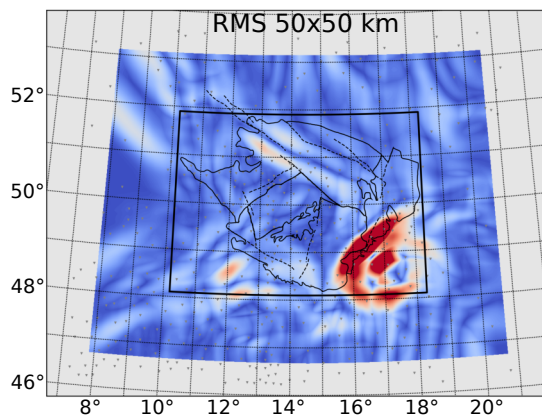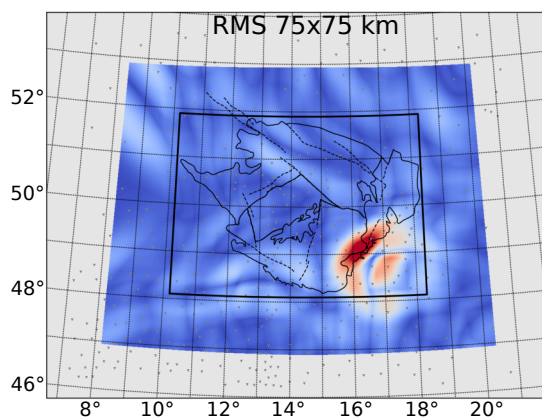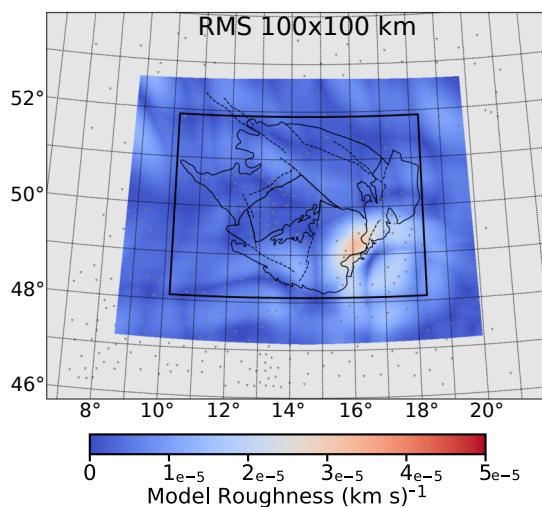

Supplement: Supplementary file 12 [file se-12-1051-2021-supplement.zip › Supplement_10.pdf]

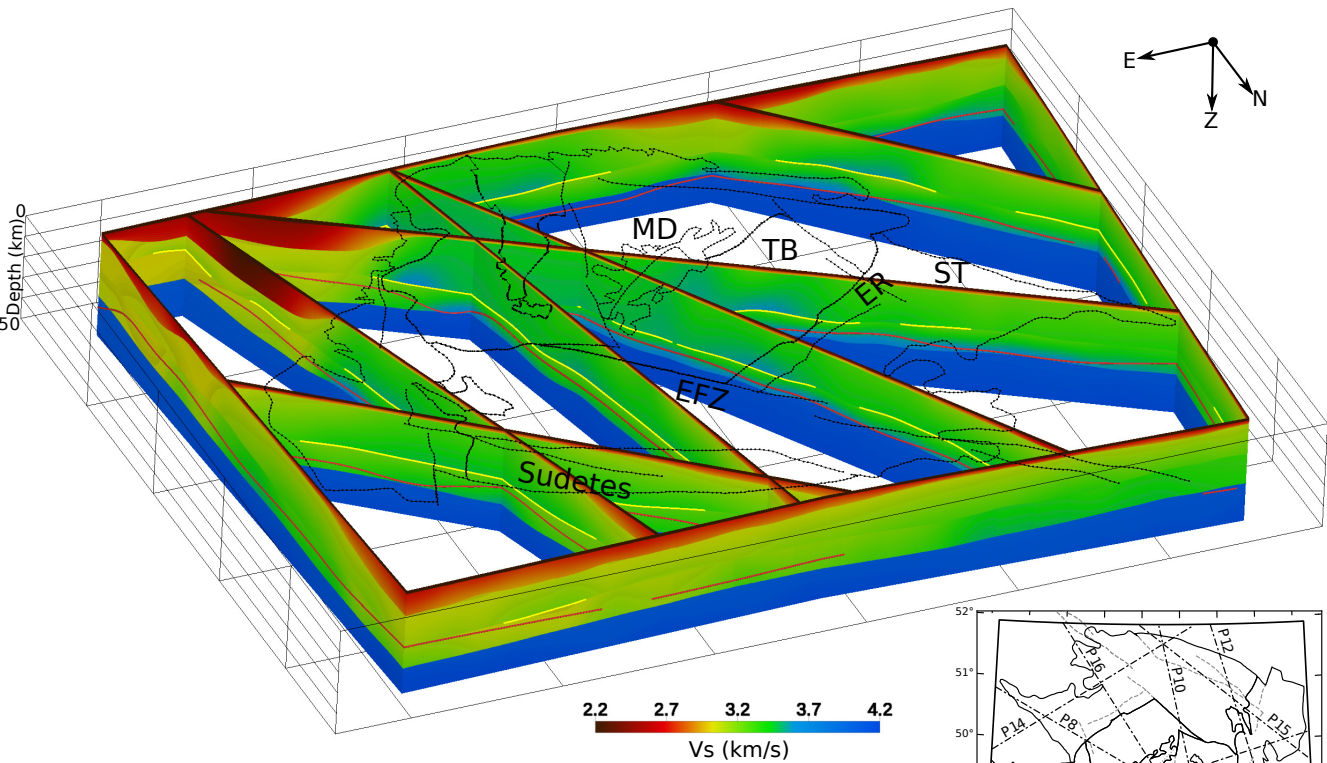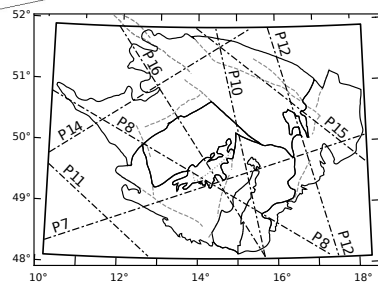

Supplement: Supplementary file 12 [file se-12-1051-2021-supplement.zip › Supplement_18.pdf]

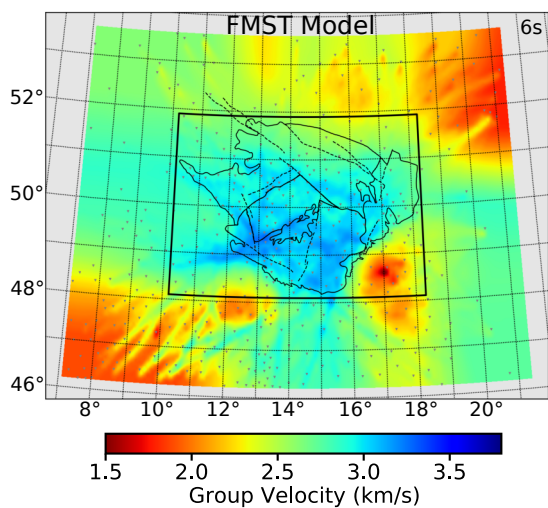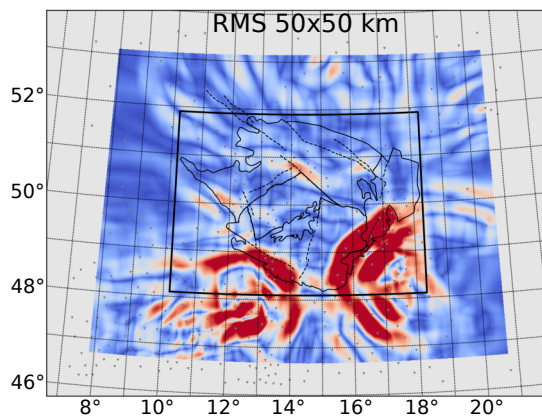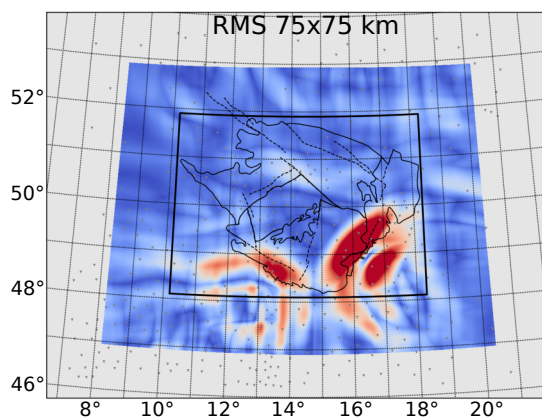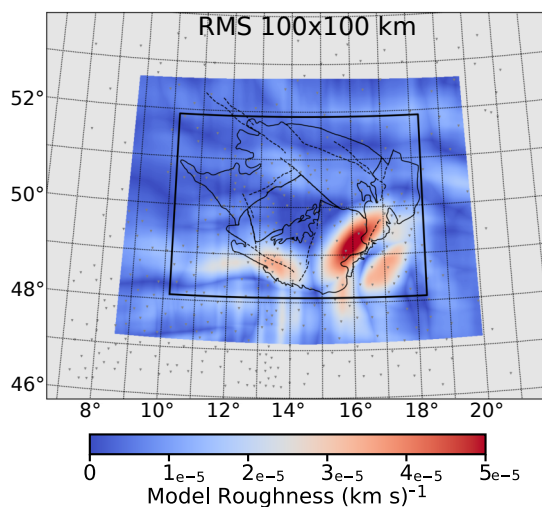

Supplement: Supplementary file 12 [file se-12-1051-2021-supplement.zip › Supplement_07.pdf]

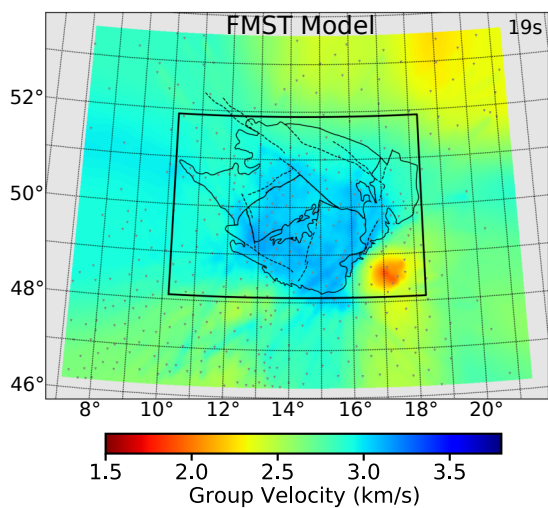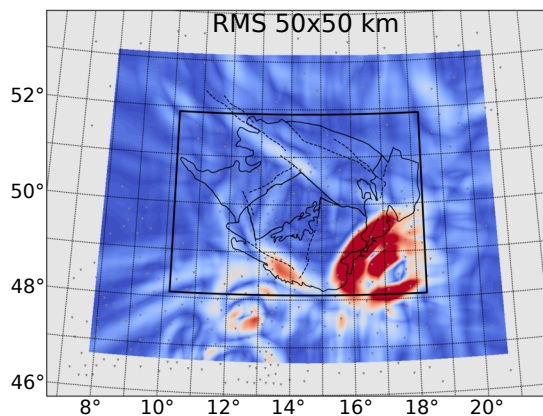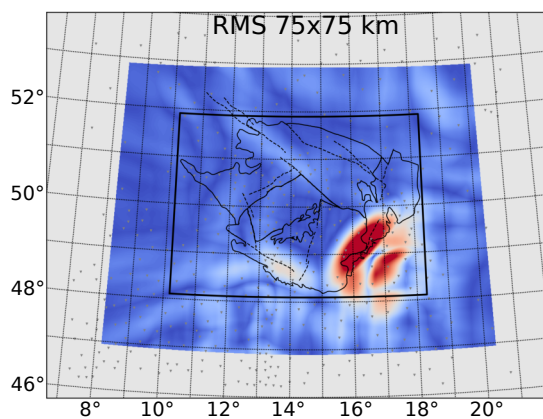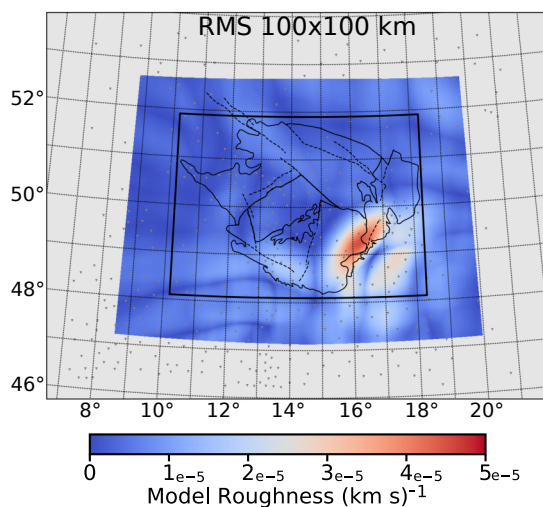

Supplement: Supplementary file 12 [file se-12-1051-2021-supplement.zip › Supplement_09.pdf]

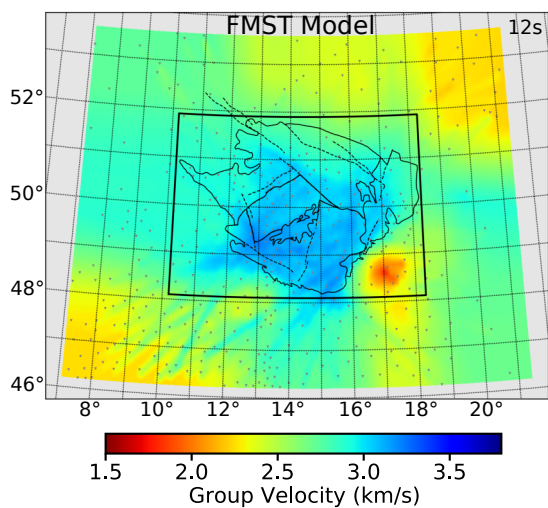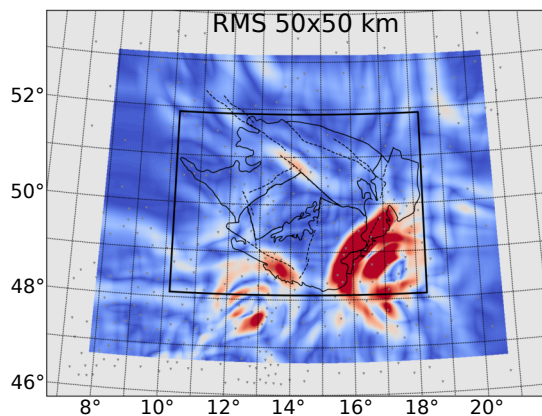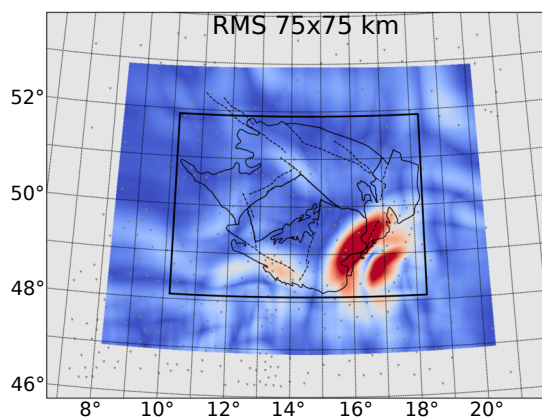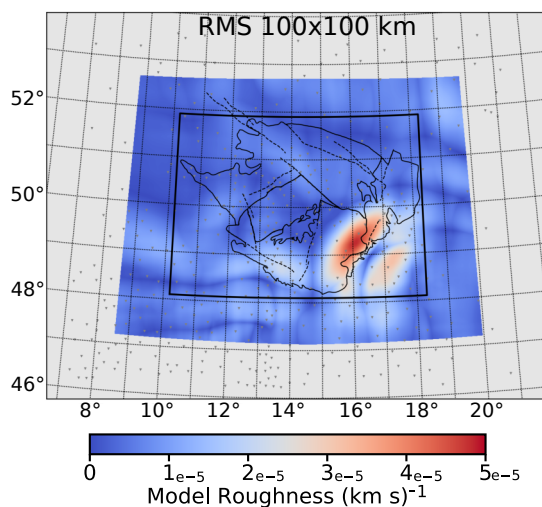

Supplement: Supplementary file 12 [file se-12-1051-2021-supplement.zip › Supplement_08.pdf]

# Band-pass filter: 43-53 s

## Summer

## Winter

a)

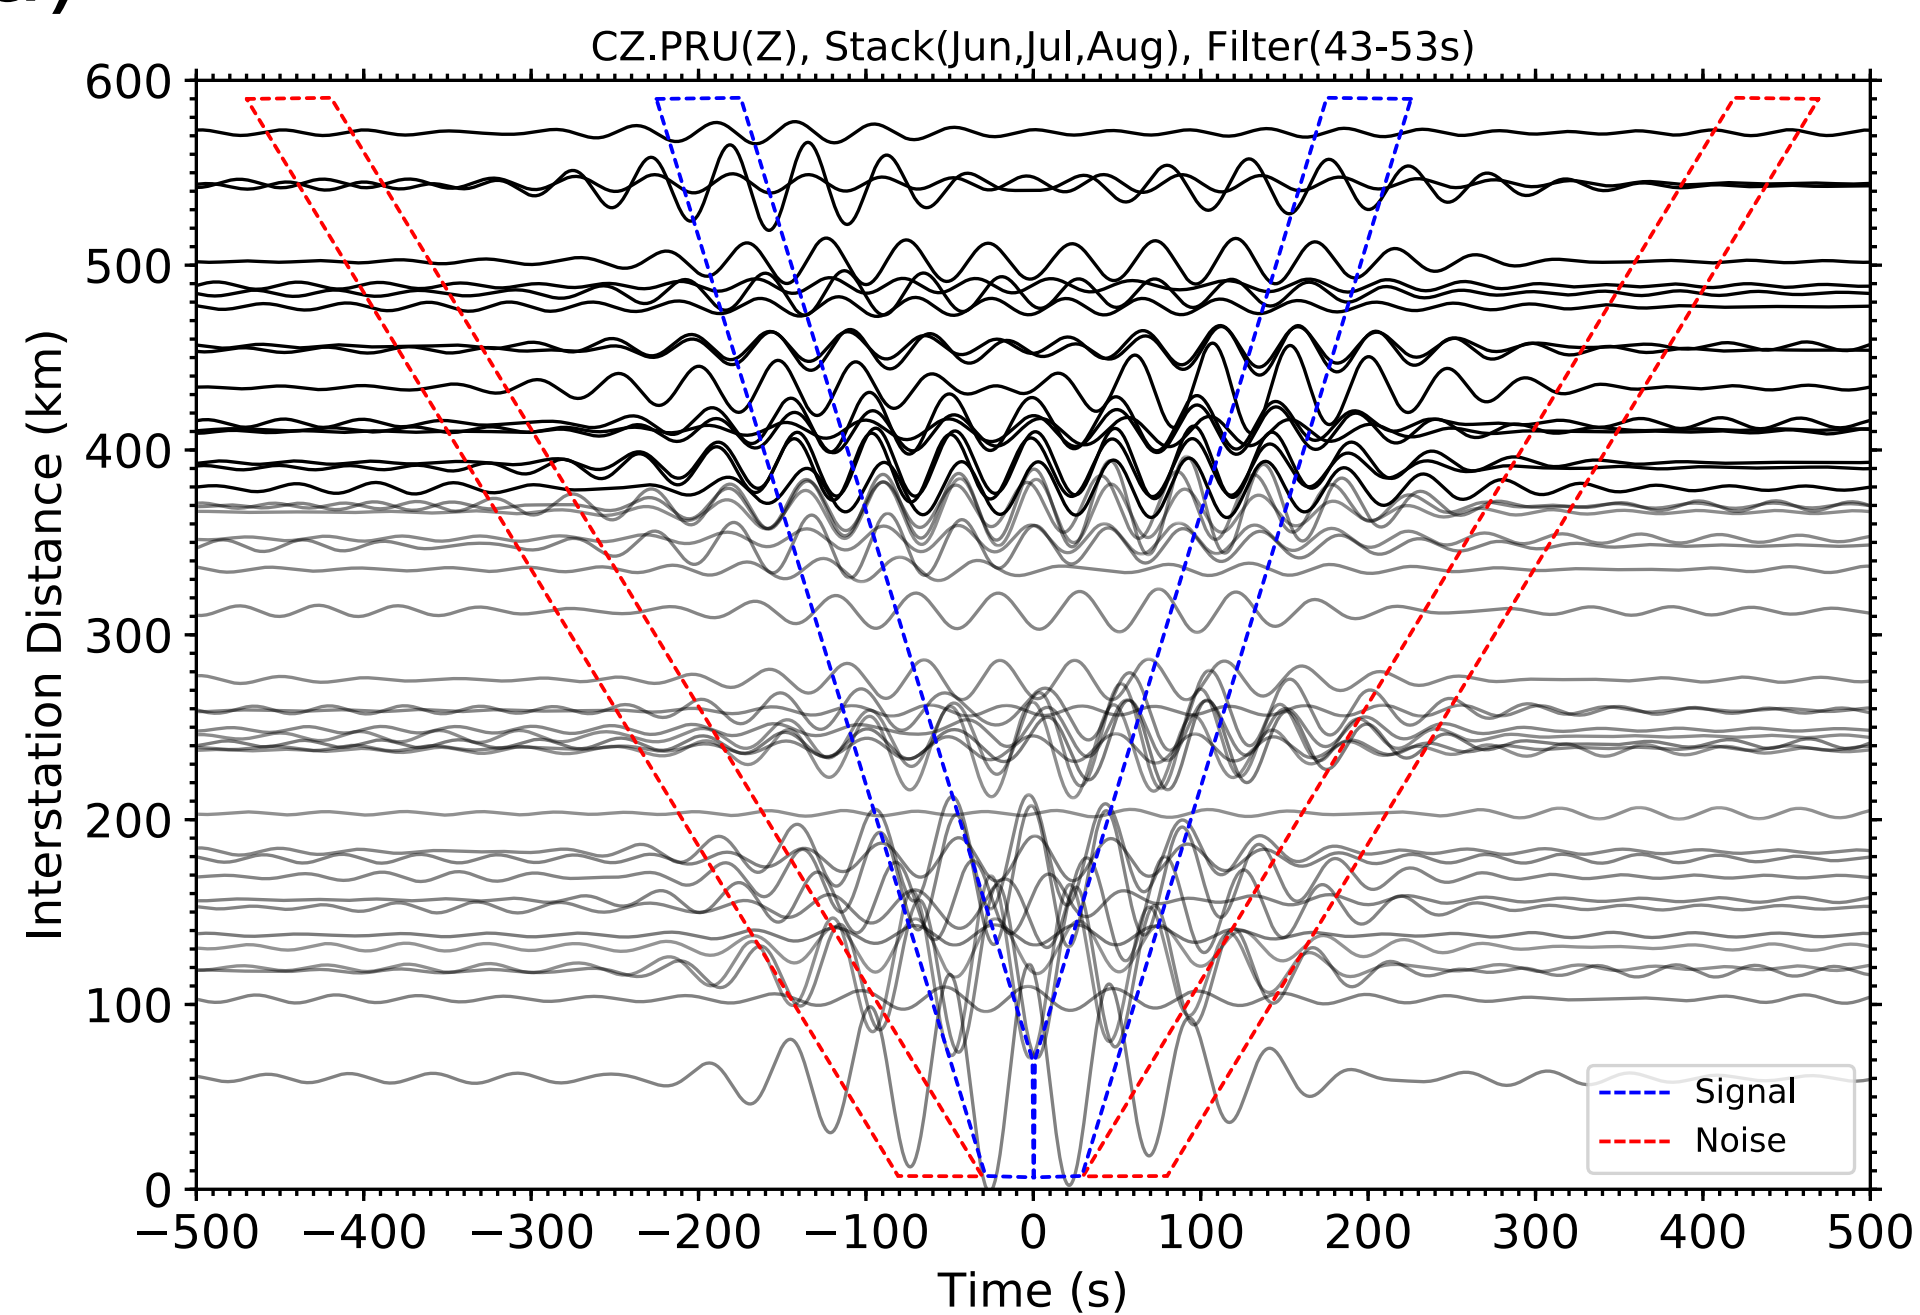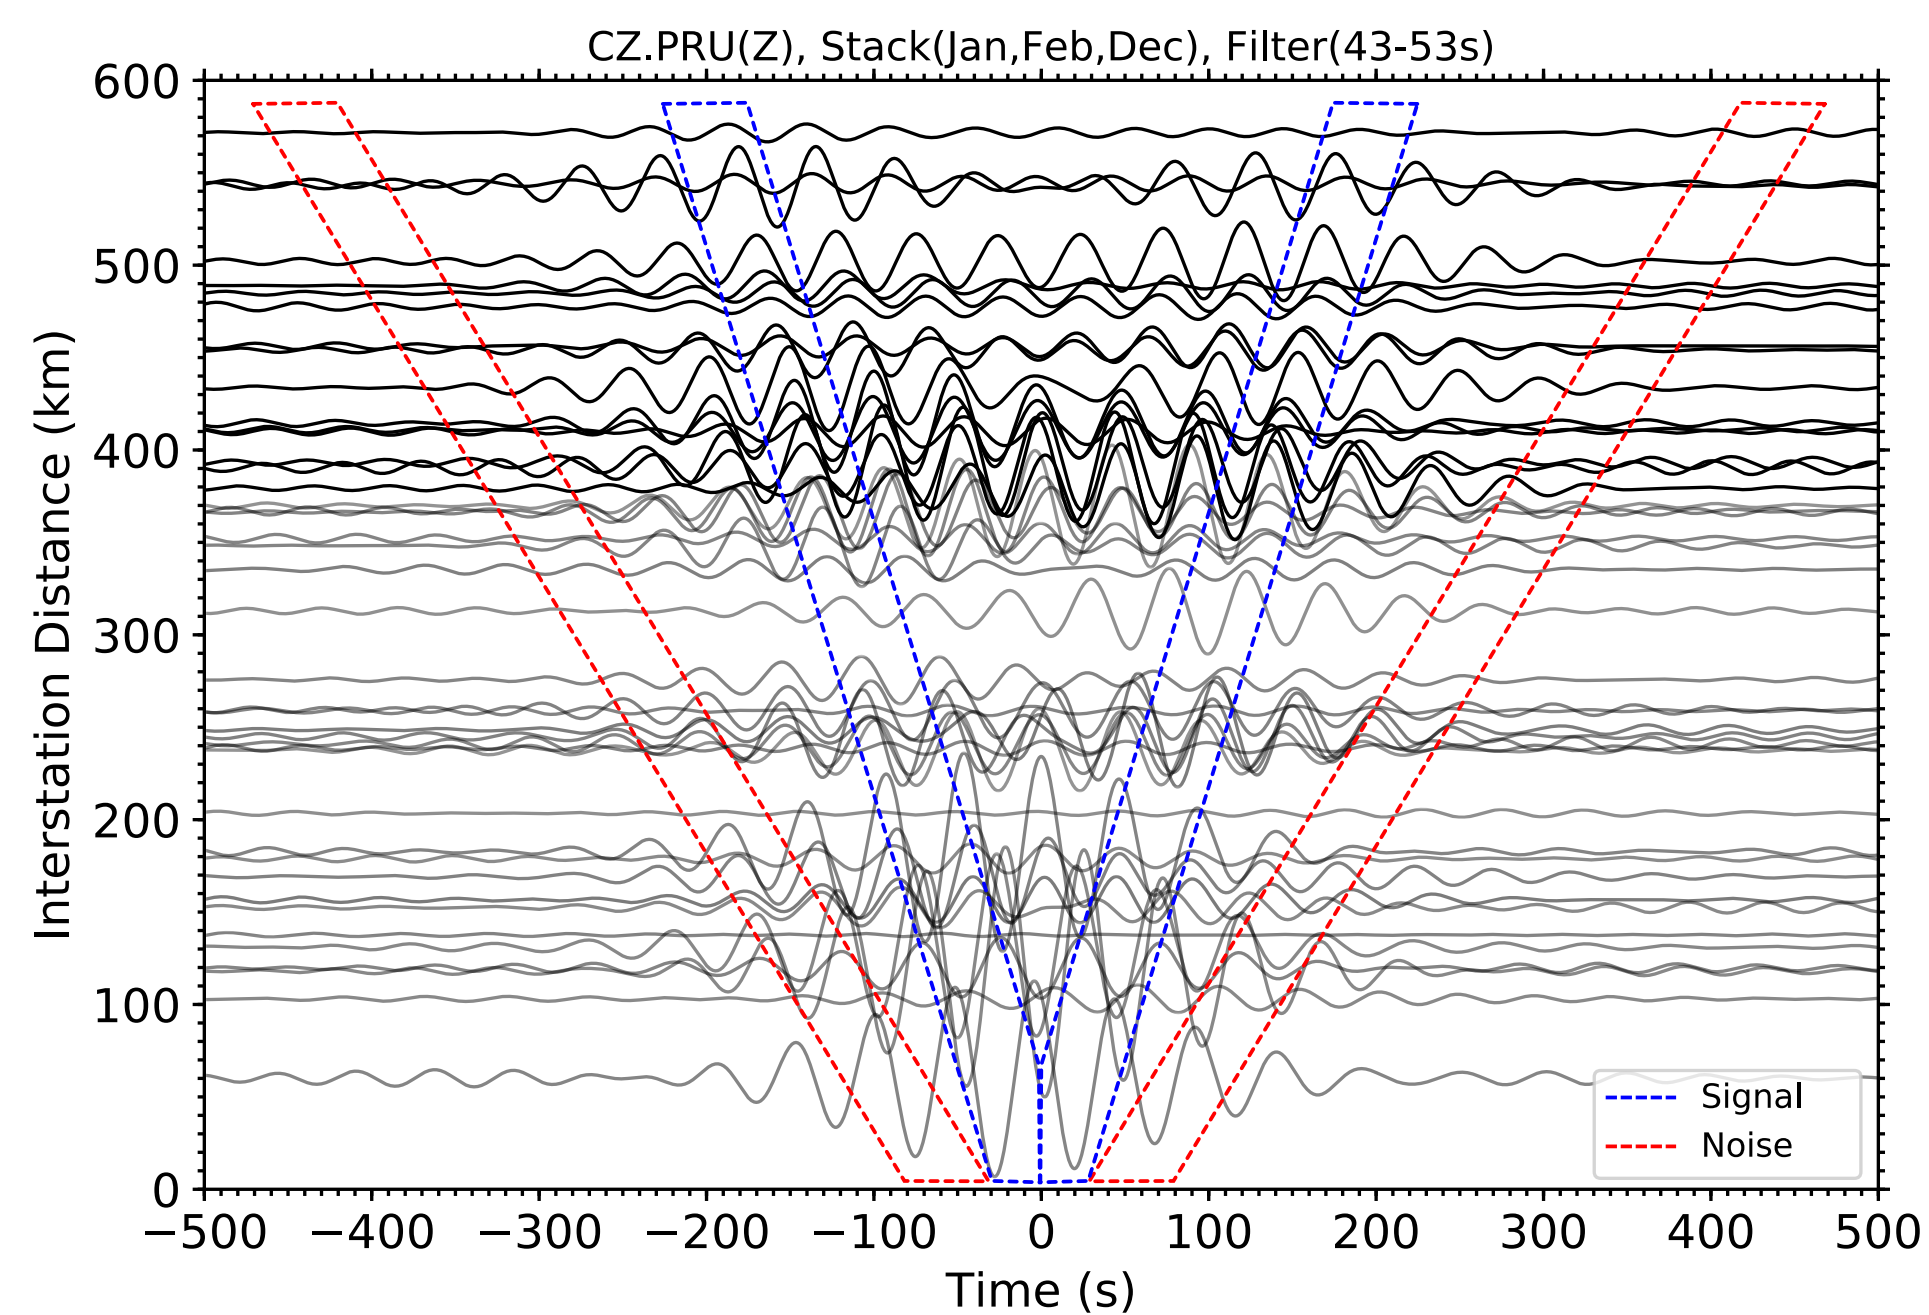

b)

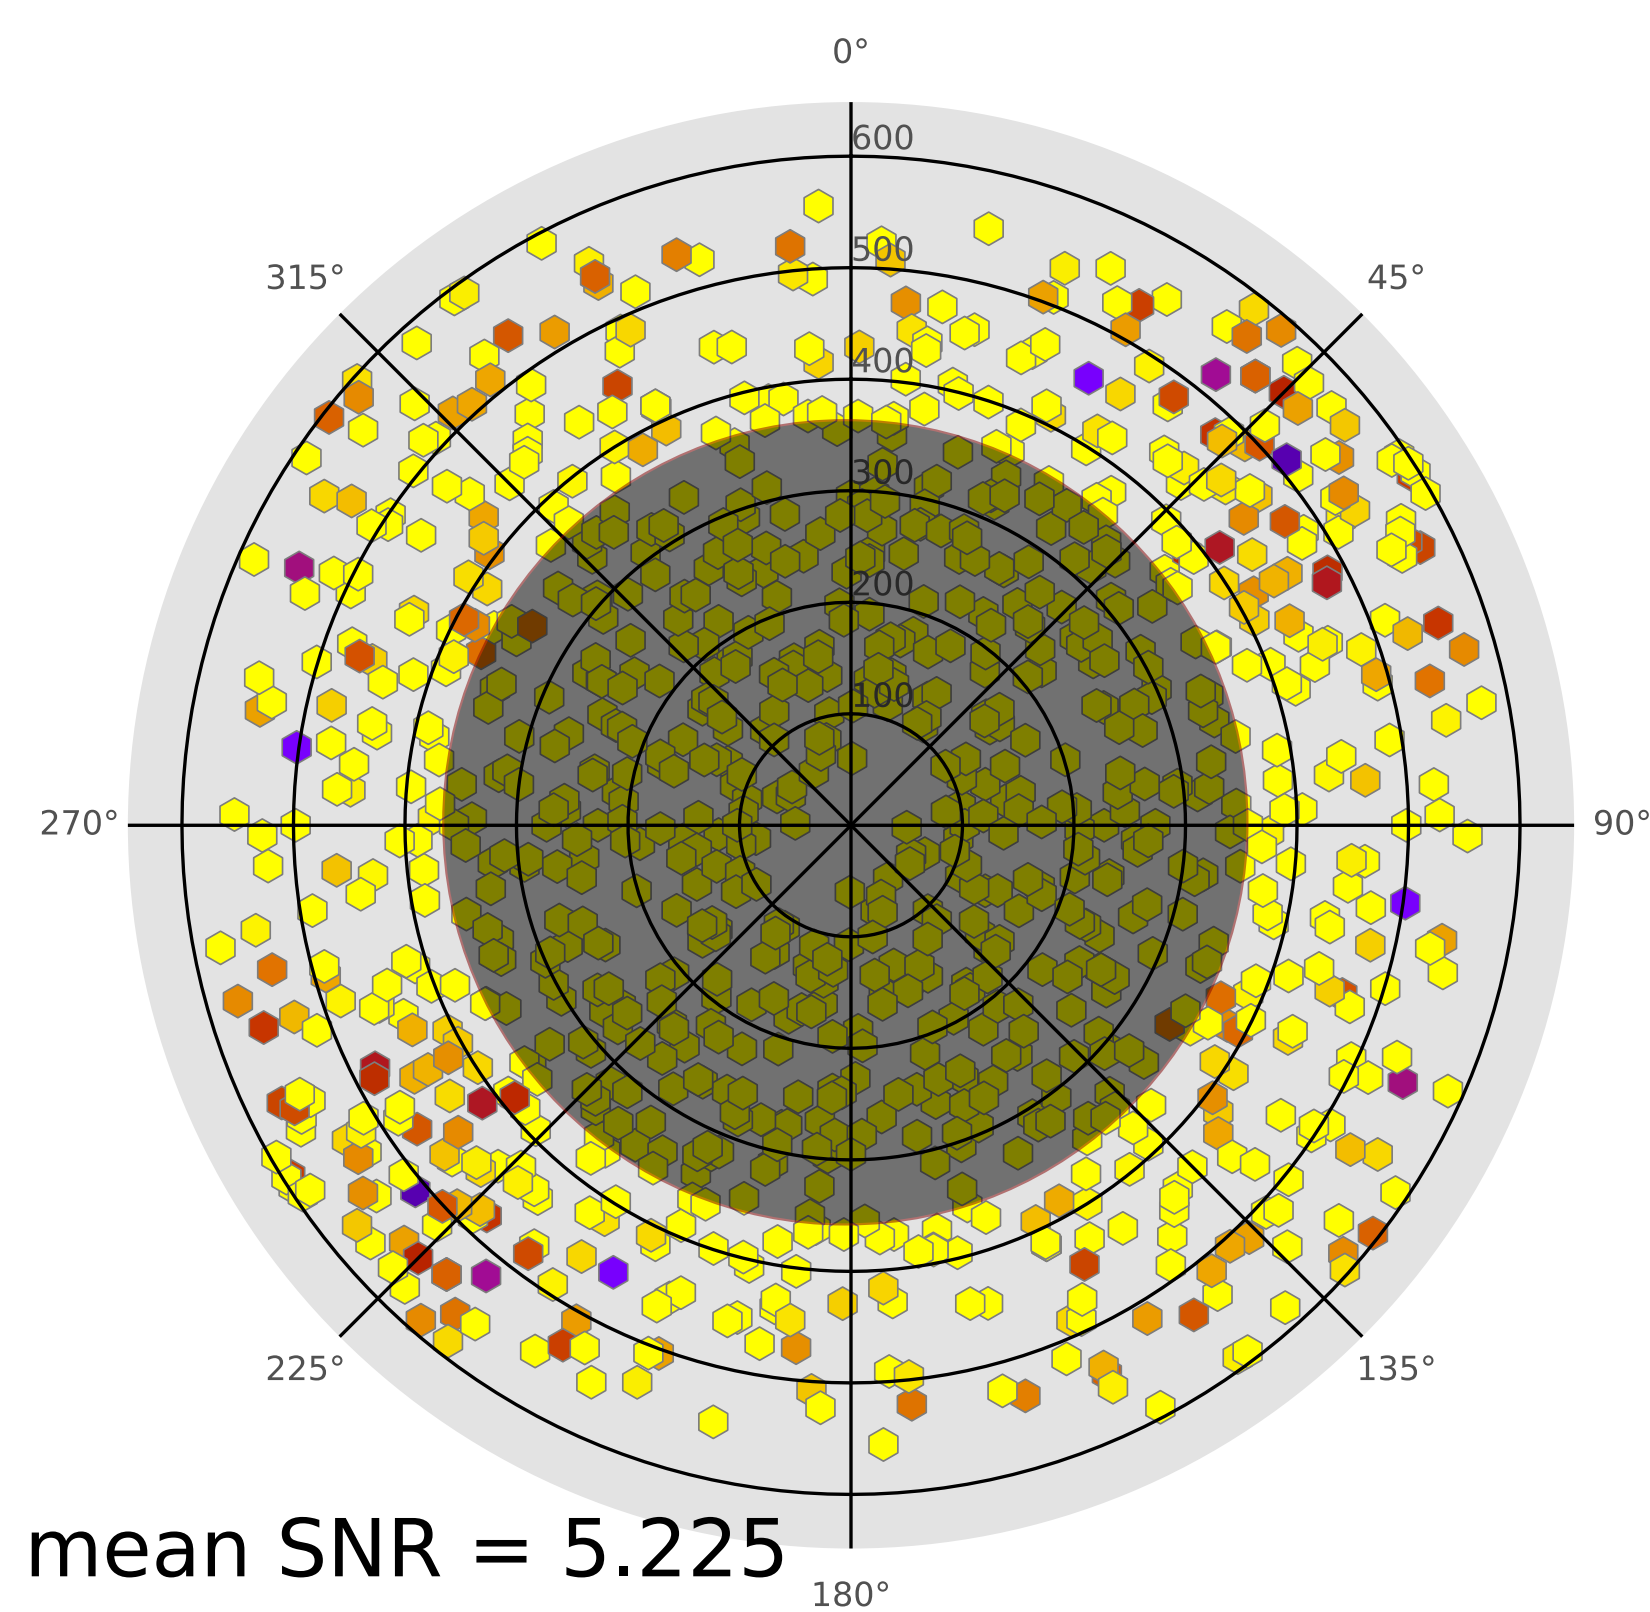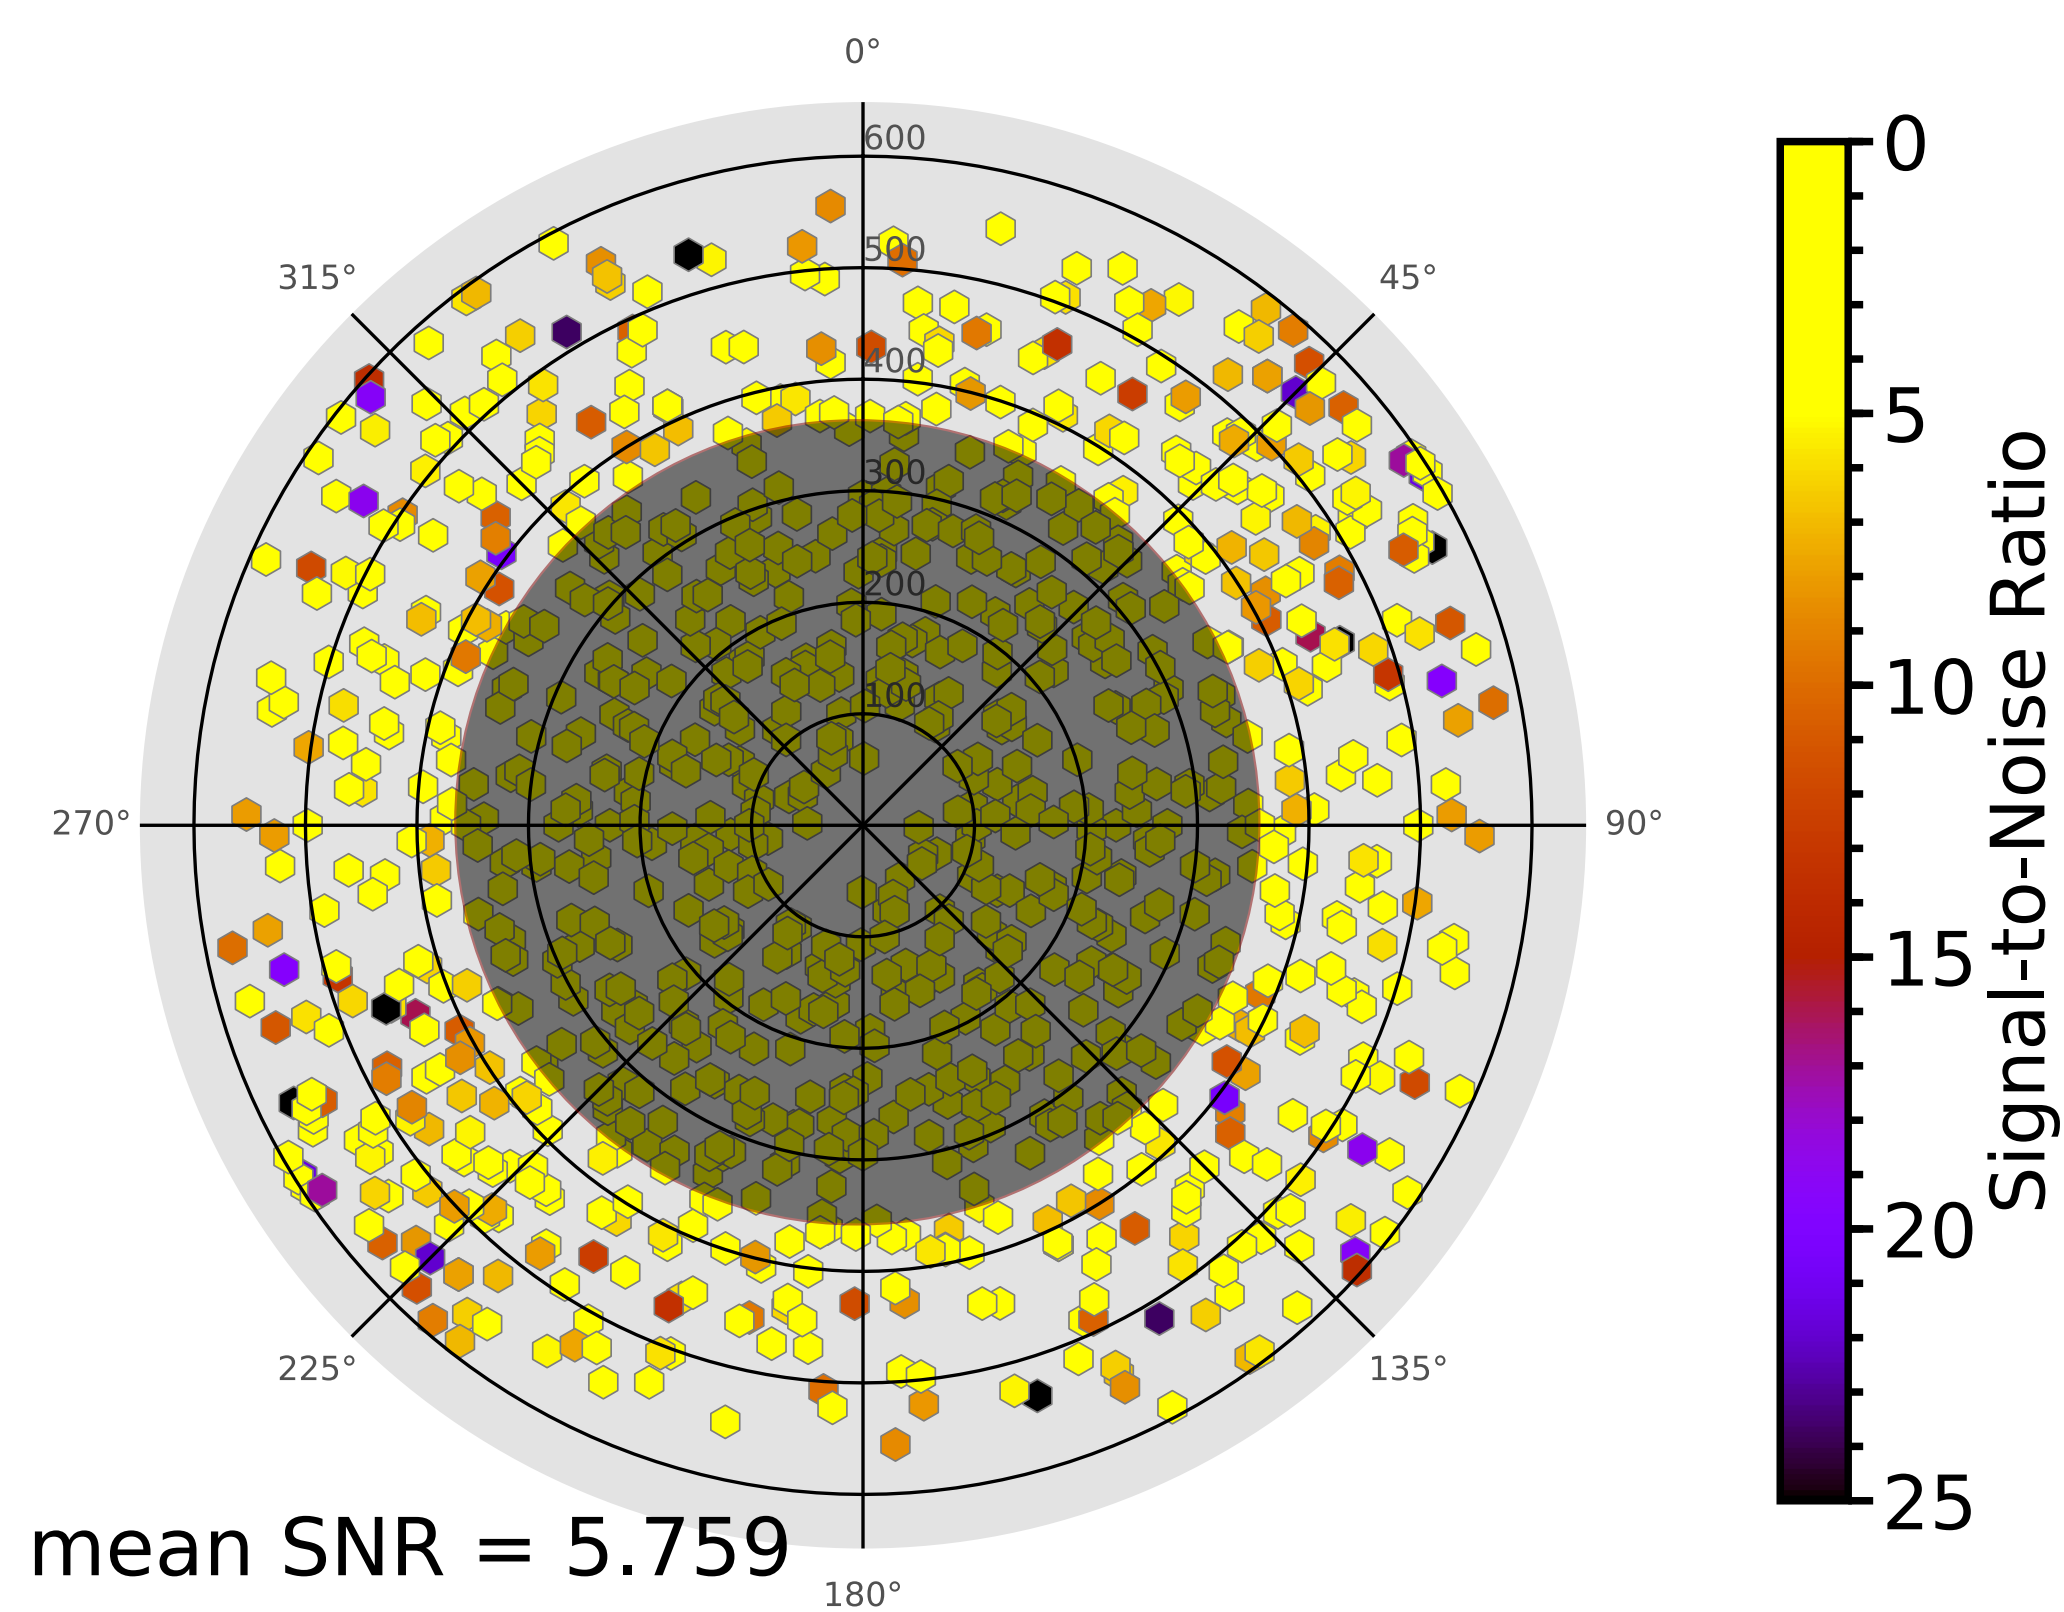

c)

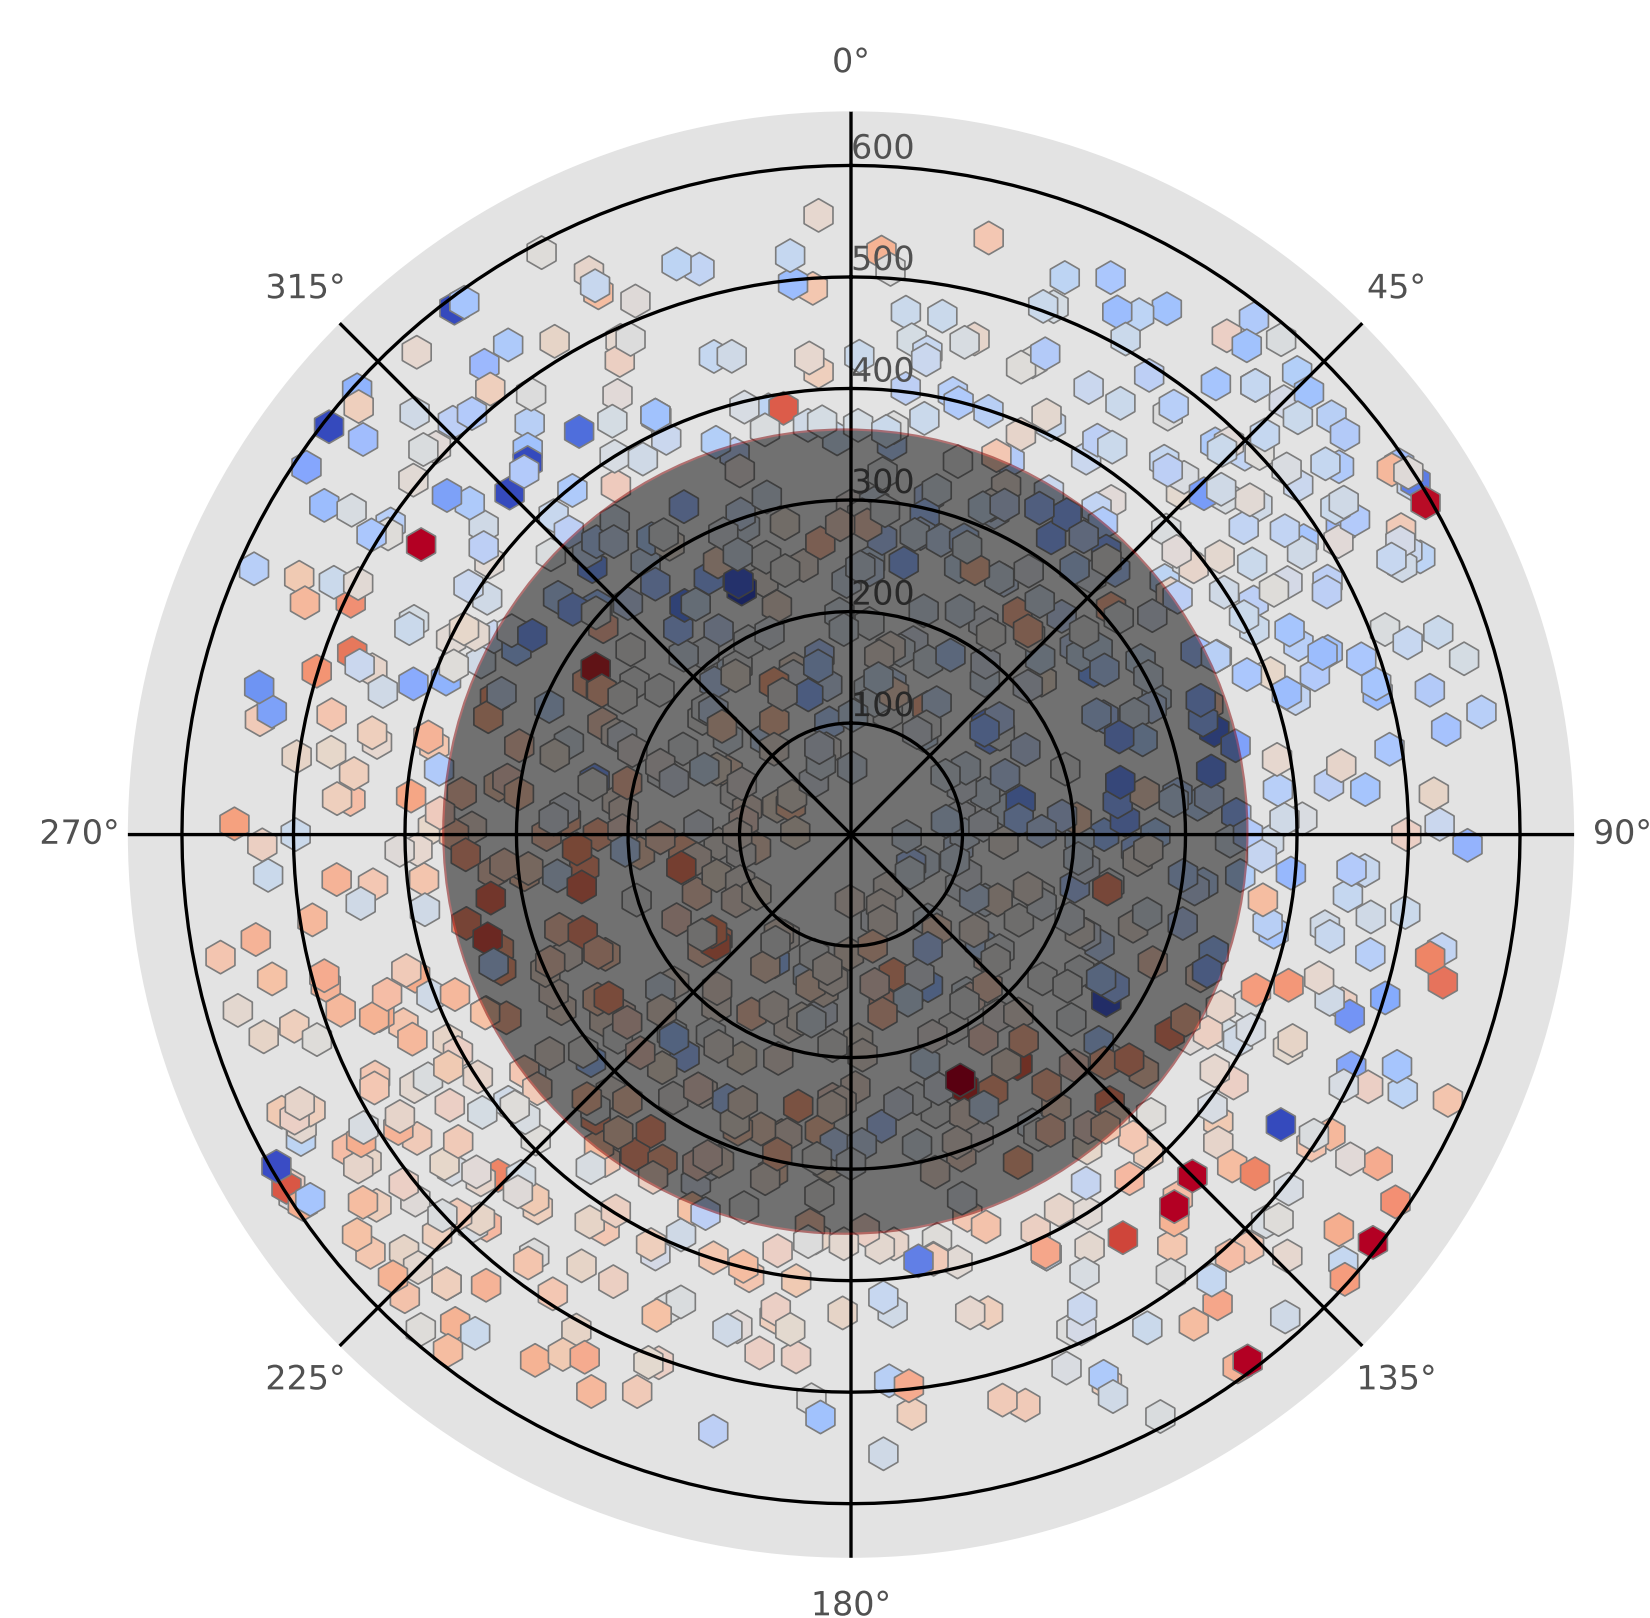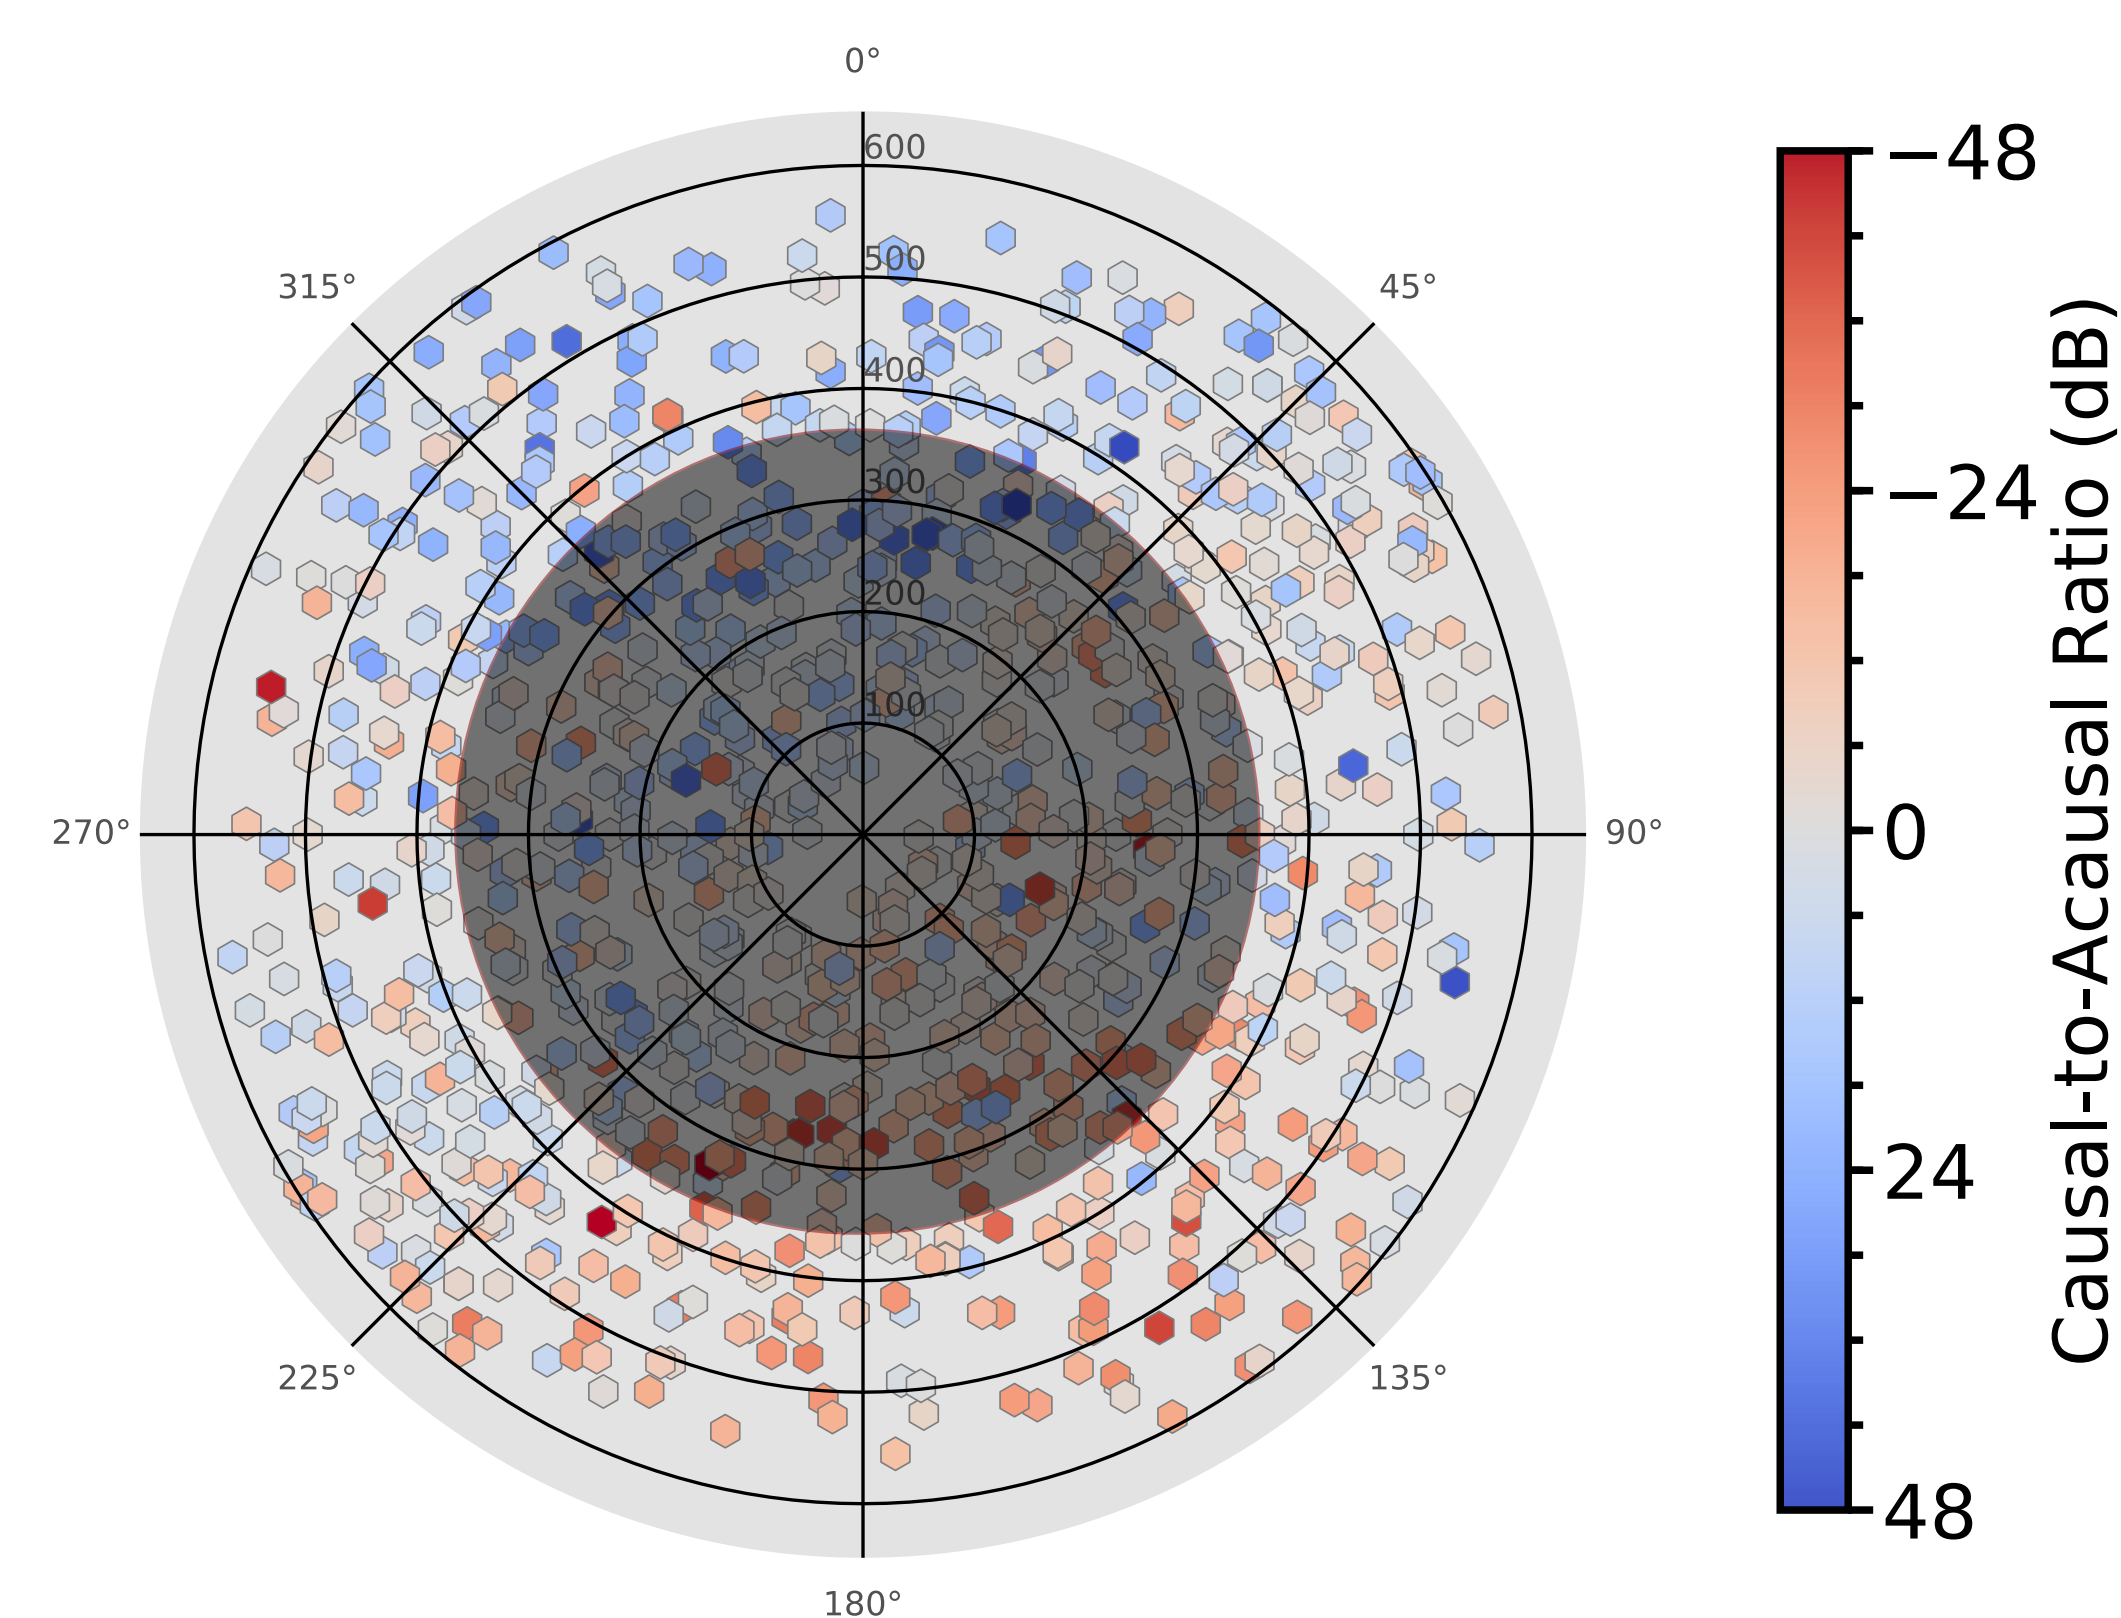

Supplement: Supplementary file 12 [file se-12-1051-2021-supplement.zip › Supplement_04_upd1.pdf]
